# 1 CD8+ lymphocytes modulate acute ZIKV viremia, innate 2 antiviral immunity and tissue dissemination in nonhuman 3 primates 4

5 Blake Schouest<sup>1,2</sup>, Marissa Fahlberg<sup>3</sup>, Elizabeth A. Scheef<sup>2</sup>, Matthew J. Ward<sup>4</sup>, Kyra Headrick<sup>4</sup>, Robert V. Blair<sup>5</sup>,  
6 Margaret H. Gilbert<sup>6</sup>, Lara A. Doyle-Meyers<sup>6</sup>, Victoria W. Danner<sup>6</sup>, Dawn M. Wesson<sup>4</sup>, Antonito T. Panganiban<sup>2,7</sup>,  
7 Nicholas J. Maness<sup>2,7\*</sup>

8 <sup>1</sup>Biomedical Sciences Training Program, Tulane University School of Medicine, New Orleans LA 70112

9 <sup>2</sup>Division of Microbiology, Tulane National Primate Research Center, Covington LA 70433

10 <sup>3</sup>Division of Immunology, Tulane National Primate Research Center, Covington LA 70433

11 <sup>4</sup>School of Public Health and Tropical Medicine, Tulane University, New Orleans LA 70112

12 <sup>5</sup>Division of Comparative Pathology, Tulane National Primate Research Center, Covington LA 70433

13 <sup>6</sup>Division of Veterinary Medicine, Tulane National Primate Research Center, Covington LA 70433

14 <sup>7</sup>Department of Microbiology and Immunology, Tulane University School of Medicine, New Orleans LA 70112

15 \*Corresponding author, Nicholas J Maness, [nmaness@tulane.edu](mailto:nmaness@tulane.edu)

16

## 17 **Abstract**

18 The critical importance of CD8+ lymphocytes during chronic viral infection is well established, but their  
19 roles in acute ZIKV infection remain incompletely explored. Importantly, antiviral CD8 responses could  
20 modulate neurological manifestations that have accompanied recent ZIKV outbreaks. The rhesus  
21 macaque model of ZIKV is a particularly valuable tool to understand immune mechanisms of ZIKV  
22 control due to similarities in immune function to humans and due to their susceptibility to infection with  
23 primary human isolates of the virus. In the present study, we infected four adult male rhesus macaques  
24 with ZIKV, two of which had been depleted of CD8+ lymphocytes prior to infection. CD8 depletion  
25 resulted in delayed viremia and a near absence of innate immune responses in the blood, demonstrated by  
26 a complete lack of neutrophil recruitment to the blood and a striking absence of transcriptional changes in  
27 type I interferon response and other key immune genes relative to non-depleted controls during acute  
28 infection. Depletion also resulted in differential patterns of monocyte expansion and reduced monocyte  
29 activation measured by CD169 expression. Notably, CD8-depleted macaques showed possible evidence  
30 of compensatory CD4 T cell responses and persistence of neutralizing antibodies at later timepoints,  
31 despite clearance of virus from serum. Neural lesions were also evident in both CD8-depleted animals.  
32 One of the depleted animals recovered CD8+ lymphocytes by 21 days post-infection and mounted a high  
33 magnitude CD8 T cell response against the virus. The other CD8-depleted animal did not recover CD8+  
34 lymphocytes over the course of the study, and post-mortem histology revealed severe brainstem  
35 encephalomalacia as well as enhanced viral dissemination in the semen and seminal vesicle. Together,  
36 these data support a potential role for CD8+ lymphocytes in control of ZIKV dissemination and in  
37 maintaining immune regulation during acute infection of rhesus macaques.

## 38 **Introduction**

39 Zika virus (ZIKV) has been a known pathogen for over half a century, but severe manifestations of  
40 disease were not directly associated with the virus for most of its history. Although recent outbreaks of  
41 ZIKV in the Western hemisphere are notorious for neurological complications including congenital Zika  
42 syndrome (CZS) and Guillain-Barré syndrome (GBS), most cases remain asymptomatic, and when  
43 symptoms arise, they are usually mild and self-limiting [1]. Differential immune responses to ZIKV  
44 infection may dictate the severity of accompanying diseases and underlie clinical outcomes.

45 As the immunological correlates of protection against ZIKV are beginning to be explored, the CD8 T cell  
46 response is emerging as an important frontline mediator of viral control, as is true with other flaviviruses.  
47 Less is known about CD4 responses in acute ZIKV infection, although a recent study found that CD4 T  
48 cells and IFN $\gamma$  signaling are indispensable for effective humoral responses to ZIKV in mice [2]. CD8+  
49 lymphocyte depletion, which is a well-established immune manipulation in rhesus macaques [3], is  
50 therefore a plausible approach to gauge how the absence of CD8+ cells impacts acute viremia and  
51 potentially induces surrogate adaptive responses.

52 CD8+ lymphocytes, including CD8 T cells and NK cells, are well known mediators of antiviral  
53 immunity, but their roles in ZIKV infection and control have only been recently addressed. Studies in  
54 mice have demonstrated CD8 T cell responses in ZIKV infection, but ZIKV-associated pathology in these  
55 models requires deficiency in type-I interferon (IFN) signaling [4, 5], which is not representative of  
56 natural ZIKV infection in humans. This is perhaps an unavoidable caveat, as ZIKV is incapable of  
57 antagonizing type-I IFN signaling in mice as it does in humans due to a lack of recognition of murine  
58 STAT2 by ZIKV NS5 [2, 6]. Disrupting IFN-I signaling, either genetically or through antibody blockade,  
59 is therefore necessary to recapitulate ZIKV neurotropism in mouse models. Importantly, these studies  
60 have identified dual protective and deleterious effects of CD8 T cell responses in ZIKV infected animals  
61 [4, 6]. While CD8+ lymphocyte infiltration of the CNS appears to reduce viral burden in the brain and  
62 spinal cord [5], CD8 influx also simultaneously promotes neural damage and hindlimb paralysis [6].  
63 However, these findings have yet to be replicated in a model sufficiently similar to humans genetically  
64 and immunologically. Given the recent development [7] and characterization [8, 9] of a rhesus macaque  
65 model for ZIKV, we sought to explore the role of CD8+ lymphocytes in acute ZIKV infection by way of  
66 CD8+ lymphocyte depletion.

67 In the present study, we infected four adult male rhesus macaques, two of which had been previously  
68 depleted of CD8+ lymphocytes, with a minimally passaged Brazilian ZIKV strain. The CD8-depleted  
69 macaques showed striking virus-response patterns that were not evident in nondepleted macaques,  
70 including delayed serum viremia, enhanced viral dissemination to peripheral tissues, and global  
71 repression of antiviral gene transcription. CD8-depleted animals also manifested brainstem lesions that  
72 were characterized by increased inflammation. Finally, the absence of CD8+ lymphocytes appeared to  
73 alter patterns of monocyte expansion and activation and induce possible compensatory CD4 T cell and  
74 humoral responses.

## 75 **Results**

### 76 **Delayed serum viremia and altered leukocyte kinetics**

77 CD8+ lymphocyte depletion commenced 14 days prior to ZIKV infection (Fig 1a), and CD8 T cells were  
78 undetectable in both treated animals as early as 11 days prior to ZIKV infection (Fig 1b). Following  
79 subcutaneous inoculation with ZIKV, nondepleted animals experienced a rapid spike in serum viremia of



80 3-4.5 logs at 1 dpi (Fig 1c), consistent with previous reports of ZIKV in rhesus macaques [7, 10].  
81 Strikingly, serum viremia in CD8-depleted macaques was delayed by one day until 2 dpi, when viral  
82 RNA was higher than in nondepleted animals (Fig 1c). For the remainder of the study, viral kinetics were  
83 similar among all animals, peaking at 3 dpi and dropping to undetectable levels by 10 dpi and beyond  
84 (Fig 1c). A previous cohort of female macaques infected with the identical strain of ZIKV demonstrated  
85 similar patterns of serum viremia to those observed in nondepleted animals (Fig S1a).

86 The previous female cohort also showed a remarkably consistent spike in neutrophil-to-lymphocyte ratio  
87 (NLR), a biomarker of inflammation [11], at 1 dpi (Fig S1c). This pattern was replicated in nondepleted  
88 animals, whereas the NLR in CD8-depleted animals did not elevate the day following infection (Fig 1d),  
89 potentially due to a slight decline in neutrophils (Fig S1d) and lymphocytes remaining stagnant in  
90 peripheral blood (Fig S1e).

91 To achieve CD8 depletion, we used an antibody targeting CD8 $\alpha$ , which is expressed on both CD8 T cells  
92 and NK cells. Thus, both cell populations were depleted in animals receiving antibody treatment. Flow  
93 cytometric analysis of NK cells in nondepleted animals revealed proliferation early in infection (Fig 1e).  
94 Intriguingly, the CD8-depleted macaque HP17 recovered NK cells and CD8 cells at later timepoints,  
95 between 15 and 21 dpi (Figs 1e & 1f).

## 96 **Quelled antiviral gene expression in whole blood**

97 To further probe innate immune responses, we analyzed antiviral responses in whole blood using a qRT-  
98 PCR array of 84 antiviral genes in the rhesus macaque genome. Relative to expression levels pre-  
99 infection, nondepleted animals showed striking upregulation of several RIG-I like receptors and type-I  
100 interferon (IFN) stimulated genes at 3 dpi, synchronous with peak serum viremia (Fig 2a). The most  
101 highly induced genes include the pattern recognition receptors TLR3, RIG-I (DDX58), and MDA5  
102 (IFIH1), as well as the IFN-stimulated genes ISG15, MX1, and OAS2. Induction of these genes at 3 dpi  
103 was generally followed by a return to near-baseline expression by 15 dpi. The gene expression profiles of  
104 both nondepleted animals were remarkably similar (Fig S2).

105 In contrast to nondepleted animals, CD8-depleted animals showed an absence of transcriptional responses  
106 in whole blood at all timepoints tested (Figs 2a and S2). However, CD86 was an exception to this pattern,  
107 which was upregulated at 1, 3, and 15 dpi in GH01 but not in HP17 (Fig S2).

108 Transcriptional analysis of whole blood revealed the general antiviral milieu in CD8-depleted and  
109 nondepleted animals, but the identity of the transcriptionally responding immune cells remained elusive.  
110 We suspected ZIKV-infected monocytes to be the main contributors to antiviral signaling owing to their  
111 reported susceptibility to infection. However, the absence of a response in CD8-depleted macaques could  
112 have been due to the lack of responding NK cells, which may contribute to antiviral signaling given their  
113 responsiveness to type-I IFNs [12].

114 To resolve the source of innate signaling, we separated the PBMCs from a nondepleted animal into CD8+  
115 from CD8- fractions and analyzed the expression of a few antiviral genes that we previously found to be  
116 expressed in whole blood. We found similar levels of gene induction among both cell fractions, although  
117 expression was slightly higher in the CD8- subset (Fig S3). Additionally, transcription of DDX58 (RIG-I)  
118 was almost exclusive to CD8- cells.

119 To further explore whether ZIKV-infected monocytes contribute to signaling within the CD8- fraction,  
120 we cultured macrophages from monocytes in vitro, infected the macrophages with ZIKV, and probed  
121 antiviral gene expression using a qRT-PCR array. We found highly overlapping transcriptional patterns to  
122 those observed in the whole blood of nondepleted animals at 3 dpi (Fig 2b).

### 123 **Altered monocyte activation and frequency**

124 The divergent transcriptional patterns in CD8-depleted and nondepleted macaques could have been due to  
125 differential monocyte phenotypes, given the susceptibility of monocytes to ZIKV infection [13, 14] and  
126 early findings that ZIKV-infected monocytes contribute to antiviral signaling [13]. To interrogate  
127 immunophenotypic effects of CD8 depletion, we developed a multicolor flow cytometry panel to track  
128 innate and adaptive immune cells over time. The resulting data were highly complex, comprising a  
129 variety of surface markers and sampling animals at multiple timepoints and with respect to different  
130 treatment groups. To survey general immune responses over time, we used viSNE [15], an adaptation of  
131 t-distributed stochastic neighbor embedding (tSNE).

132 CD8 depletion appeared to affect monocyte activation as measured by CD169 expression. Nondepleted  
133 animals showed early activation of monocytes, which peaked at 3 dpi and returned sharply to baseline by  
134 15 dpi (Fig 3a). This pattern was present in all monocyte subsets (Fig S4a-c). In contrast, CD8-depleted  
135 animals showed a more prolonged trajectory of monocyte activation, persisting beyond 15 dpi. The  
136 activation marker CD69 was also decreased on total monocytes in CD8-depleted animals early in  
137 infection (Fig S4d).

138 CD8 depletion also affected patterns of monocyte abundance. Nonclassical monocytes expanded  
139 preferentially in CD8-depleted macaques (Fig 3b), while the same was true of intermediate monocytes in  
140 nondepleted animals (Fig 3c). Nondepleted animals also showed expansion of classical monocytes at 1  
141 dpi and then again at necropsy (Fig 3d).

142 viSNE analysis revealed differential expression of CD95 (Fas) in CD8 depletion, which was found to be  
143 significantly increased on nonclassical monocytes in CD8-depleted animals (Fig S4e) and on classical  
144 monocytes in GH01 at 10-15 dpi (Fig S4f).

### 145 **Possible compensatory CD4 and humoral responses**

146 CD8 depletion also promoted differential adaptive immune responses to ZIKV. During infection,  
147 nondepleted animals showed activation of effector memory (EM) CD8 cells (Figs 4a & 4b). Meanwhile,  
148 CD8-depleted animals showed activation of EM CD4 cells (Figs 4a & 4d), a pattern not seen in  
149 nondepleted animals. Linear mixed model (LMM) analysis revealed that CD8 depletion significantly  
150 increased CD69 expression on EM CD4 cells (+25.6%, P=0.001949).

151 To further characterize CD8 responses, we performed intracellular cytokine staining (ICS) of PBMCs  
152 stimulated with peptides derived from the ZIKV proteome. Nondepleted macaques showed evidence of  
153 CD8 T cell responses, which were co-positive for perforin and IFN $\gamma$  (Fig 4c). Further supporting CD8  
154 responses in these animals, CD8 T cell frequency increased between 3 and 10 dpi (Fig 1f), which  
155 appeared to be driven by expansion of naïve and EM CD8 cells (Figs S5a-b). Intriguingly, the CD8-  
156 depleted animal HP17 also mounted a CD8 T cell response at 21 dpi (Fig 4c), soon after this animal  
157 recovered CD8 cells (Fig 1f). In all animals with CD8 cells present, CD8 T cell responses were greater at  
158 the earlier of the two timepoints tested (Fig 4c).

159 We also used ICS to explore possible compensatory CD4 responses in CD8-depleted macaques. Both  
160 depleted animals showed evidence of antigen-specific Th1 responses at necropsy, characterized by co-  
161 positivity for IFN $\gamma$  and IL-2 (Fig 4e). These responses were also antigen-specific in both macaques,  
162 preferential toward ZIKV E and NS1. GH01 exhibited moderate CD4 T cell responses at both timepoints  
163 tested (15 and 30 dpi), whereas HP17 showed a robust response at 30 dpi alone. Contrastingly,  
164 nondepleted animals showed no appreciable Th1 responses to viral peptides. Further supporting  
165 compensatory CD4 responses, CD8-depleted animals showed significantly higher proliferation of naïve  
166 CD4 cells (Fig S5e, +3.9% Ki67+ cells, P= 0.005396) and CM CD4 cells (Fig S5f, +4.97%, P= 0.003123)  
167 in addition to higher activation of CM CD4 (Fig S5f) EM CD4 cells (Fig 4d, +25.6%, P=0.001949)  
168 relative to nondepleted macaques.

169 To gauge humoral responses to ZIKV, we conducted a plaque reduction neutralization test (PRNT) to  
170 quantify neutralizing antibody titers in serum. All animals except JP58 showed evidence of neutralizing  
171 antibodies at 7 dpi, the earliest post-infection timepoint tested (Fig 4f). While all animals similarly  
172 achieved highly neutralizing titers at 15 dpi, nondepleted animals receded in their antibody concentrations  
173 beyond this timepoint. Strikingly, CD8-depleted animals retained high titers until necropsy, a finding  
174 consistent with significantly higher rates of B cell proliferation in these animals (Fig 4g, +4.0%,  
175 0.004905).

## 176 **Enhanced tissue dissemination and neuropathology**

177 Given the maintenance of highly neutralizing antibody titers in CD8-depleted macaques, we suspected  
178 that virus might be lingering in the peripheral tissues of these animals. Informed by previous reports of  
179 ZIKV tropism in rhesus macaques [16, 17], we searched for viral RNA in lymphoid, reproductive, and  
180 neural tissues.

181 CD8-depleted macaques had significantly higher levels of viral RNA in the mesenteric lymph node  
182 relative to nondepleted animals (Fig 5a). Additionally, ZIKV was detectable in the cervical and inguinal  
183 lymph nodes of all four animals but was most abundant in the CD8-depleted macaque HP17 (Fig 5a).

184 Although all animals were negative for virus in the testes and prostate, GH01 manifested a high viral load  
185 in semen at 21 dpi (Fig 5c), the final timepoint obtained. ZIKV RNA was also detected in the seminal  
186 vesicle of GH01 at necropsy (Fig 5a). HP87 showed a minor amount of virus in the semen at 10 dpi,  
187 which was cleared by 15 dpi (Fig 5c).

188 We found no ZIKV RNA in the neural tissues of any animal (Fig 5a). However, we also probed for ZIKV  
189 RNA in cerebrospinal fluid (CSF) to further explore potential neural dissemination. All animals except  
190 HP87 harbored virus in the CSF, peaking at 7-10 dpi (Fig 5b), after serum viremia had waned. Notably,  
191 the CSF viral loads in depleted macaques were over an order of magnitude greater than in nondepleted  
192 animals.

193 Although ZIKV was not detected in the CNS of any animal, CD8-depleted macaques manifested neural  
194 lesions that were not present in nondepleted animals. Most strikingly, the brainstem of GH01 showed an  
195 area of severe multifocal to coalescing malacia, characterized by vacuolation, swollen axons, and  
196 infiltration by lymphocytes and gitter cells (Fig 5d). Gitter cells are occasionally found within dilated  
197 myelin sheaths. Scant brown granular pigment (presumed hemosiderin) and a proliferative cerebral vessel  
198 adjacent to the malacia may indicate that the malacia is the result of a vascular event (thromboemboli,  
199 infarct, ischemia, etc.).

200 No gross abnormalities were noted in HP17. However, the sciatic nerve of this animal exhibited mild  
201 lymphocytic perivasculitis, and the brainstem contained a localized area of gliosis and dilated myelin  
202 sheaths (Fig 5e). A cause for these neural inflammatory lesions was not apparent by histology.

## 203 Discussion

204 Owing to the importance of CD8<sup>+</sup> T cells in control of ZIKV in mice [4, 5], our aim was to explore the  
205 consistency of these findings in rhesus macaques by way of CD8<sup>+</sup> lymphocyte depletion. Importantly, the  
206 anti-CD8 $\alpha$  monoclonal antibody used for depletion targets not only CD8<sup>+</sup> T cells but also NK cells. NK  
207 cells are well known regulators of antiviral immunity so any deficiency in host response following  
208 treatment with anti-CD8a could indicate that either or both type of cells are important for acute control of  
209 ZIKV.

210 Strikingly, CD8-depleted macaques showed a one-day delay in the establishment of serum viremia, in  
211 patent contrast to patterns of ZIKV in rhesus macaques observed by our own group (Fig S1) and others  
212 [7]. However, CD8 depletion does not appear to drastically alter viral kinetics, given that all animals  
213 exhibited similar viral kinetics at later timepoints. The mechanism underlying delayed serum viremia in  
214 the absence of CD8<sup>+</sup> lymphocytes remains to be explored. However, monocytes are known hosts of  
215 ZIKV in blood [13, 14], and there is crosstalk between NK cells and monocytes, [18] an intercellular  
216 interaction that is suspected to modulate transcriptional responses to ZIKV infection [13]. Activation  
217 signals from NK cells may induce viral replication in infected monocytes, and the absence of NK cells in  
218 CD8-depleted macaques could delay early viremia in these animals. Alternatively, NK cells in pigtail  
219 macaques are reportedly permissive to ZIKV early in infection [14], so the absence of this potential host  
220 cell may contribute to delayed viral replication.

221 CD8 depletion also appeared to affect peripheral leukocyte homing in response to ZIKV infection.  
222 Neutrophil-to-lymphocyte ratio (NLR) is a biomarker of inflammation [11], and we previously observed a  
223 highly consistent pattern of NLR spike 1 day following subcutaneous ZIKV inoculation of rhesus  
224 macaques. This pattern was replicated in nondepleted animals but not in those depleted of CD8<sup>+</sup>  
225 lymphocytes, which was an early indication of potentially altered innate immune responses.

226 Confirming dysregulated innate responses in context of CD8 depletion, these macaques showed a  
227 confounding silence of antiviral signaling in whole blood. This contrasted with standard host  
228 transcriptional responses in nondepleted animals, with robust induction of several RIG-I-like receptors  
229 (RLRs) and type-I IFN-stimulated genes early in infection, concomitant with peak serum viremia.  
230 Importantly, there is precedence for sensing of flaviviruses by RLRs [19].

231 Although we suspected ZIKV-infected monocytes to be the primary contributors to antiviral gene  
232 expression, an important caveat of probing whole blood is that the identity of the transcriptionally  
233 responding cell types is unknown. Considering that NK cells are highly responsive to type-I IFN [12] and  
234 potential targets of ZIKV [14], the absence of NK cells in CD8-depleted animals could conceivably  
235 account for the transcriptional silence in these animals. Active gene induction in purified CD8<sup>+</sup> cells from  
236 a nondepleted animal indicates that NK cells may indeed contribute to antiviral signaling in whole blood.  
237 However, antiviral signaling in the CD8<sup>-</sup> fraction from this same animal affirms an absence of  
238 transcriptional activation in CD8-depleted animals that did not simply result from a lack of NK cells.

239 Focusing on antiviral signaling in myeloid cells, we found that macrophages infected with ZIKV in vitro  
240 showed patterns of transcriptional activation largely overlapping with those observed in nondepleted  
241 animals. This suggests that ZIKV infected myeloid cell types, such as monocytes, may be driving  
242 antiviral gene induction in blood. Further, transcriptional patterns in nondepleted animals as well as in

243 cultured macrophages (Fig 3) were remarkably similar to responses previously reported in ZIKV infected  
244 primary human fibroblasts [20], supporting uniform transcriptional regulation in ZIKV-infected cells  
245 regardless of lineage.

246 Consistent with a model of monocyte-driven transcriptional responses to ZIKV infection, CD8-depleted  
247 and nondepleted macaques also differed in their patterns of monocyte frequency and activation.  
248 Strikingly, CD8-depleted macaques showed preferential expansion of nonclassical monocytes, an  
249 outcome previously observed in human patients infected with Asian-lineage ZIKV [21]. Infection and  
250 expansion of nonclassical monocytes was also previously found to be accompanied by an M2-skewed  
251 immunosuppressive phenotype [21], which may account for the absence of antiviral gene induction in  
252 CD8-depleted macaques in the present study. Future experiments will explore the possibility of  
253 immunosuppressive signaling in these animals.

254 In contrast with CD8-depleted macaques, nondepleted animals showed expansion of intermediate and  
255 classical monocyte subsets. A separate study of ZIKV in human patients in Nicaragua indicated  
256 preferential infection of intermediate monocytes [22], which are known to exhibit proinflammatory  
257 phenotypes. Preferential infection and expansion of intermediate monocytes in nondepleted animals might  
258 have contributed to the elevation of antiviral gene transcription in blood.

259 CD8 depletion also appeared to affect patterns of monocyte activation, which could have further  
260 modulated antiviral signaling. Nondepleted animals showed early activation of monocytes, consistent  
261 with recent findings of ZIKV infection in rhesus macaques [16, 23]. In contrast, CD8-depleted animals  
262 showed a more prolonged trajectory of monocyte activation, which persisted until later timepoints.  
263 CD169 (siglec-1) is a sialic acid-binding lectin known to have important roles in virus capture and  
264 transport by myeloid cells [24]. Additionally, CD169<sup>+</sup> macrophages are shown to be important in the  
265 mounting of CD8 T cell responses in viral infection [25]. Enhanced CD169 expression on monocytes in  
266 nondepleted macaques might have promoted CD8 responses in these animals.

267 Indeed, CD8 T cell responses were evident in nondepleted macaques at earlier timepoints, which is  
268 corroborated by expansion of naïve CD8 T cells and activation of EM CD8 T cells. Surprisingly, the  
269 CD8-depleted animal HP17 also mounted a CD8 T cell response immediately following recovery of  
270 CD8<sup>+</sup> lymphocytes, supporting the importance of CD8 responses in acute ZIKV infection. There is  
271 precedence for CD8 T cell responses in ZIKV-infected mice [26] and humans [27], which appears to be  
272 consistent in the rhesus macaque model.

273 Meanwhile, CD8-depleted macaques showed evidence of Th1 CD4 responses, which might have been  
274 induced to compensate for the absence of cytolytic CD8 activity in these animals. This finding too is  
275 consistent with mice, which exhibit Th1 polarization of CD4 cells on ZIKV infection [26]. Given the  
276 comparative lack of CD4 response in nondepleted animals, these findings imply that CD8 responses,  
277 when intact, are the primary mediators of adaptive cellular immunity against ZIKV; however, Th1  
278 responses may provide important second-line antiviral defense to ZIKV in rhesus macaques.

279 CD8-depleted macaques also showed possibly enhanced humoral responses relative to nondepleted  
280 animals. Humoral immunity is known to mediate protection against ZIKV in rhesus macaques, with  
281 neutralizing antibodies detected as early as 7-10 dpi [16], consistent with the present study. Interestingly,  
282 CD8-depleted animals showed persistence of neutralizing antibodies until necropsy, despite serum  
283 viremia being cleared well before this timepoint. The maintenance of high antibody titers suggested that  
284 there might be virus lingering in the peripheral tissues of these animals.



285 Indeed, viral dissemination appeared more extensive in CD8-depleted macaques by necropsy. Despite the  
286 small sample size of the present study, either of the CD8-depleted animals showed a higher level of viral  
287 RNA in the semen, seminal vesicle, cervical LN, or inguinal LN relative to nondepleted animals. Further,  
288 CD8-depleted macaques showed comparatively higher viral loads in the mesenteric lymph node and CSF.  
289 Although a previous report indicated variable tissue dissemination of ZIKV in acutely-infected rhesus  
290 macaques [17], it was encouraging to observe similar patterns of viral localization within treatment  
291 groups.

292 Despite the absence of ZIKV RNA in the brain of any animal, both CD8-depleted macaques presented  
293 with neural lesions at necropsy that were not evident in nondepleted animals. Although the lesions cannot  
294 be directly attributed to ZIKV infection, our observations are consistent with pathological manifestations  
295 of ZIKV in mice and humans. The most severe lesion was in the brainstem of GH01, the CD8-depleted  
296 animal that never recovered CD8 cells. We noted an extensive region of encephalomalacia which showed  
297 evidence of Wallerian degeneration, characterized by swollen axons and infiltration of phagocytic gitter  
298 cells. Importantly, similar manifestations have been described in ZIKV infection of human fetal brain  
299 tissue [28, 29].

300 Neural lesions in HP17 were less severe, and interestingly, this animal also recovered CD8 cells and  
301 mounted CD8 T cell responses during infection. The sciatic nerve of HP17 exhibited mild inflammation,  
302 a location that ZIKV has previously been identified in mice depleted of CD8 cells [4]. Also, the brainstem  
303 contained glial nodules, which are an indicator of CNS damage that can be seen in viral encephalitis

304 Although it is tempting to speculate that CD8 depletion in GH01 and HP17 promoted neural  
305 dissemination of ZIKV and consequent pathological sequelae, our inability to detect viral RNA precludes  
306 this conclusion. Because the virus was cleared from the CNS within 30 dpi, it is possible that these  
307 lesions could still be virus associated even if viral RNA was not detectable in these lesions at the time of  
308 necropsy. It is worth noting that CNS localization of ZIKV has been observed as early as 5 dpi in acutely  
309 infected macaques [10]. Separately, a recent study of acute ZIKV infection in rhesus macaques failed to  
310 identify ZIKV RNA in the CNS at 14 dpi, despite diffuse patterns of viral dissemination [17]. These  
311 findings establish precedence for early CNS dissemination of ZIKV in nonhuman primates, which may be  
312 cleared later in infection.

313 In CD8-depleted animals, the absence of NK and CD8 T cell surveillance could have facilitated ZIKV  
314 infection of neural tissues, but infection might have been transient due to the eventual priming of CD4  
315 and humoral responses or other immune responses. Additionally, ZIKV is shown to localize as discrete  
316 foci in rhesus macaque tissues [23], complicating the detection of sparse viral lesions within organs. The  
317 absence of antiviral gene induction and IFN signaling in CD8-depleted macaques could have also  
318 contributed to viral dissemination, given that type-I IFN signaling may limit ZIKV neurotropism [6, 31].

319 In summary, the present study illustrates a pliable dynamic between ZIKV and its hosts. CD8 depletion  
320 appears to alter patterns of innate immune activation and regulation, possibly disrupting patterns of  
321 antiviral signaling. CD8 T cells may provide default adaptive immune responses to ZIKV, and their  
322 absence may induce compensatory CD4 and humoral responses. Finally, CD8+ lymphocytes appear to  
323 constitute frontline defenses to ZIKV, potentially limiting viral dissemination to lymphoid tissues,  
324 reproductive organs, and the CNS.

## 325 **Methods**

### 326 **Animal experiments**

327 The four adult male Indian origin rhesus macaques (*Macaca mulatta*) utilized in this study were housed at  
328 the Tulane National Primate Research Center (TNPRC). The TNPRC is fully accredited by AAALAC  
329 International (Association for the Assessment and Accreditation of Laboratory Animal Care), Animal  
330 Welfare Assurance No. A3180-01. Animals were cared for in accordance with the NRC Guide for the  
331 Care and Use of Laboratory Animals and the Animal Welfare Act. Animal experiments were approved by  
332 the Institutional Animal Care and Use Committee of Tulane University (protocol P0367).

333 Two animals (GH01 and HP17) were depleted of CD8<sup>+</sup> lymphocytes by administration of the anti-CD8 $\alpha$   
334 antibody MT807R1 (NHP Reagent Resource; <https://www.nhpreagents.org>) [3]. Four administrations of  
335 5-10 mg/kg were given subcutaneously or intravenously at days 14, 11, 7, and 10 days pre-infection, as  
336 per the distributor's protocol. All four animals were subcutaneously infected with 10<sup>4</sup> PFU of a Brazilian  
337 ZIKV isolate at 0 dpi (Fig 1a). For data comparison, we included viral loads and CBC data from a  
338 previous cohort of 4 non-pregnant female rhesus macaques (CJ89, GA04, HE78, and JD24) that were  
339 similarly infected with the same dose of the same Brazilian ZIKV isolate as was used in this study.

340 Whole blood, CSF, and semen were obtained from animals at the indicated timepoints. Peripheral blood  
341 mononuclear cells (PBMCs) were isolated using SepMate tubes (Stemcell Technologies) according to the  
342 manufacturer's protocol. At necropsy, the indicated tissues were collected and snap-frozen.

### 343 **Virus quantification**

344 Viral RNA (vRNA) was extracted from serum and CSF using the High Pure Viral RNA Kit (Roche).  
345 Semen, as well as the indicated lymphoid, reproductive, and neural tissues were homogenized in Qiazol  
346 (Qiagen) using disposable tissue grinders (Fisherbrand), and RNA was isolated using the RNeasy Lipid  
347 Tissue Mini Kit (Qiagen). vRNA from body fluids and tissues was quantified using qRT-PCR as  
348 described previously [8].

### 349 **Antiviral gene expression assays**

350 2.5 ml whole blood was drawn from each animal at 0, 1, 3, and 15 dpi into PAXgene blood RNA tubes  
351 (PreAnalytiX) and equilibrated to -80°C as per the manufacturer's protocol. RNA was extracted from  
352 blood samples using the PAXgene blood RNA kit (PreAnalytiX), and cDNA was synthesized using the  
353 RT2 First Strand Kit (Qiagen). The rhesus macaque antiviral response was analyzed by way of qRT-PCR  
354 using RT2 Profiler PCR Arrays (Qiagen).

355 To identify cells contributing to antiviral signaling in blood, the CD8 microbead kit (Miltenyi Biotec) was  
356 used to separate CD8<sup>+</sup> from CD8<sup>-</sup> fractions in PBMCs from the nondepleted animal JP58 at peak  
357 transcriptional activity (3 dpi). RNA was isolated from cell fractions using the RNeasy Mini Kit (Qiagen),  
358 and cDNA was synthesized using the RT2 First Strand Kit (Qiagen). RT2 qPCR Primer Assays (Qiagen)  
359 were used to analyze expression of ISG15, OAS2, and DDX58 relative to b-actin (ACTB) in CD8<sup>+</sup> and  
360 CD8<sup>-</sup> fractions.

361 To characterize antiviral signaling in myeloid cells, PBMCs were isolated from the whole blood of 4  
362 naïve colony rhesus macaques as described above, and CD14 microbeads (Miltenyi Biotec) were used to  
363 isolate monocytes. Monocytes were cultured at 1 × 10<sup>6</sup> cells/ml in RPMI-1640 medium supplemented  
364 with 1% human AB serum (Sigma), 20 ng/ml M-CSF (Peprotech), 1% L-glutamine, and 1%  
365 penicillin/streptomycin. After 7 days of culture, monocytes were sufficiently differentiated into

366 macrophages and were infected with the same Brazilian ZIKV isolate described above. At 24 hpi, RNA  
367 was extracted using the RNeasy Mini Kit (Qiagen), and qRT-PCR arrays were used to analyze rhesus  
368 antiviral signaling as described previously.

### 369 Flow cytometry and gating strategy

370 PBMCs from the indicated timepoints were thawed, washed, and stained using Live/Dead Fixable Aqua  
371 Dead Cell Stain Kit (Invitrogen). PBMCs were then stained for the surface markers CD16 (AL488;  
372 BioLegend), CD169 (PE; BioLegend), CD28 (PECF594; BD Biosciences), CD95 (PCP-Cy5.5;  
373 BioLegend), CD3 (PE-Cy7; BD Biosciences), CD8 (PacBlue; BioLegend), CD14 (BV605; BD  
374 Biosciences), HLA-DR (BV650; BioLegend), NKG2A (APC; Beckman Coulter), and CD4 (APC-H7;  
375 BD Biosciences). Cells were subsequently fixed in FluoroFix buffer (BioLegend), permeabilized using  
376 Perm/Wash buffer (BioLegend), and stained intracellularly for CD69 (BV711; BD Biosciences) and Ki67  
377 (AL700; BD Biosciences). Flow cytometry was performed on a BD LSRII instrument and data were  
378 analyzed using FlowJo (vX.10.4.2) and viSNE (Cytobank) softwares.

379 Cytometry data were first gated for lymphocytes, singlets, and live cells. NK cells were considered as  
380 CD8<sup>+</sup>/CD16<sup>+</sup>. CD4 T cells (CD3<sup>+</sup>/CD4<sup>+</sup>) and CD8 T cells (CD3<sup>+</sup>/CD8<sup>+</sup>) were gated into naïve  
381 (CD28<sup>+</sup>/CD95<sup>-</sup>), central memory (CD28<sup>+</sup>/CD95<sup>+</sup>), and effector memory (CD28<sup>-</sup>/CD95<sup>+</sup>) subsets. CD3-  
382 cells were divided into B cells (DR<sup>+</sup>/CD14<sup>-</sup>/CD16<sup>-</sup>) and monocytes (classical, CD14<sup>++</sup>/CD16<sup>-</sup>;  
383 intermediate, CD14<sup>+</sup>/CD16<sup>+</sup>; nonclassical, CD14<sup>low</sup>/CD16<sup>+</sup>). Cell subsets were analyzed with respect to  
384 frequency, proliferation (Ki67<sup>+</sup>) and activation (CD69<sup>+</sup> or CD169<sup>+</sup>).

### 385 Intracellular cytokine staining

386 PBMCs from the indicated timepoints were thawed and rested overnight prior to stimulation with peptide  
387 pools comprising ZIKV C, M, E, and NS1 (BEI Resources). On peptide stimulation, cells were also  
388 treated with brefeldin A (BioLegend), GolgiStop (BD Biosciences), anti-CD28 (NHP Reagent Reference  
389 Program, [www.nhpreagents.org/](http://www.nhpreagents.org/)), anti-CD49d (BioLegend), and anti-CD107a (AL700; BD Biosciences).  
390 24 hours post-stimulation, cells were stained for the surface markers CD3 (PE-Cy7; BD Biosciences),  
391 CD8 (PacBlue; BioLegend), and CD4 (APC-H7; BD Biosciences). Cells were also fixed and  
392 permeabilized as described above and stained intracellularly for perforin (FITC; Mabtech), granzyme B  
393 (PE; Invitrogen), CD69 (PE-CF594; BD Biosciences), IL-2 (PCP-Cy5.5; BD Biosciences), and IFN $\gamma$   
394 (AL647; BioLegend). Flow cytometry was performed on a BD LSRII instrument and data were analyzed  
395 using FlowJo software (vX.10.4.2).

### 396 Plaque reduction neutralization tests

397 ZIKV PRNTs were conducted according to previously published protocols [32, 33]. Briefly, ZIKV MEX-  
398 I-44 isolated in Tapachula, Mexico in 2016 was obtained from The University of Texas Medical Branch,  
399 Galveston, TX and cultured to passage 8 in Vero cells. Serum specimens were incubated for one hour at  
400 serial dilutions of 1:10, 1:20... 1:320 with previously frozen virus stock of known plaque forming unit  
401 (PFU). Samples were then inoculated in duplicate onto a mono-layer of Vero cells grown on 6-well  
402 plates and allowed to incubate for an additional hour. Infectious material was then removed and replaced  
403 with a 1:1 mixture of Vero media and Avicel® before being incubated for 4 days. To read plaques, the  
404 Avicel® layer was fixed with 10% neutral buffered formalin. Finally, the formalin-Avicel® layer was  
405 removed and the monolayer was stained with crystal violet, washed with tap water and allowed to dry  
406 before plaques were counted manually.

407 Percent reduction in observed plaques and a PRNT90 cutoff were used for interpretation. A PRNT90 titer  
408 is the dilution of a sample at which a 90% reduction in possible plaques is observed. The maximum

409 number of potential plaques was obtained for each run using a corresponding back-titration and a linear  
410 model was fit to the observed number of plaques for each dilution. A PRNT90 titer was derived for each  
411 sample using the linear model and the equation for a straight line in the statistical program R [34]. For  
412 samples that were positive but above the resolution of the PRNT assay the value of the greatest number of  
413 possible plaques for that run, as determined by the back titration, was assigned for each dilution for use  
414 with the linear model.

## 415 Histology

416 Tissues samples collected at necropsy were fixed in Z-Fix (Anatech), embedded in paraffin and 5  $\mu$  m  
417 thick sections were cut, adhered to charged glass slides, and either stained routinely with hematoxylin and  
418 eosin or Prussian blue.

## 419 Statistical analysis

420 For viral loads, Mann-Whitney U tests were performed using GraphPad Prism v6.07 (GraphPad  
421 Software). For immune cell phenotyping, linear mixed model analyses were performed using R statistical  
422 computing [34] with the *lme4* package [35]. Animal variation was considered a random effect, while  
423 fixed effects included CD8 depletion, dpi, and expression level of the marker in question. P-values were  
424 calculated using likelihood ratio tests of the full model against a reduced model lacking the effect of CD8  
425 depletion.

## 426 Figure legends

### 427 Fig 1

428 Delayed serum viremia and altered leukocyte kinetics in CD8-depleted macaques. **(A)** Study design; of  
429 the 4 adult male rhesus macaques used in the study, 2 (GH01 and HP17) were depleted of CD8+  
430 lymphocytes, while the other 2 animals (HP87 and JP58) were not. All animals were infected with a  
431 Brazilian isolate of ZIKV, and viremia was tracked over 30 days. **(B)** Total CD8 T cell counts in blood, as  
432 determined by flow cytometry. **(C)** Viral RNA in serum over infection. **(D)** Neutrophil-to-lymphocyte ratio  
433 (NLR), derived using total neutrophil and lymphocyte counts in blood from complete blood count data.  
434 **(E)** NK cell proliferation, as measured by Ki67 expression over time. **(F)** Frequency of CD8 T cells over the  
435 course of the study.

### 436 Fig 2

437 Quelled antiviral gene expression in whole blood of CD8-depleted macaques. **(A)** Quantification of  
438 antiviral gene transcription in whole blood of nondepleted and CD8-depleted animals, using a qRT-PCR  
439 array of 84 genes in the rhesus macaque genome. Fold regulation at 1, 3, and 15 dpi was determined  
440 relative to day 0. **(B)** Comparison of antiviral signaling in cultured ZIKV-infected macrophages and the  
441 whole blood of nondepleted animals at 3 dpi.

### 442 Fig 3

443 Altered patterns of monocyte activation and frequency in CD8-depleted macaques. **(A)** viSNE analysis of  
444 monocyte activation, as measured by CD169 expression. The viSNE clustering profile of monocyte  
445 subsets (*left*) and corresponding CD169 heatmaps in nondepleted and CD8-depleted macaques over  
446 time (*center*), with line graph summary (*right*). **(B-D)** Frequencies of nonclassical (B), intermediate (C),  
447 and classical (D) monocyte subsets over infection.

#### 448 Fig 4

449 Possible compensatory CD4 and humoral responses in CD8-depleted macaques. **(A)** viSNE analysis of T  
450 cell activation, as measured by CD69 expression. The viSNE clustering profile of CD4 and CD8 T cell  
451 subsets (*left*) and corresponding CD69 heatmaps in nondepleted and CD8-depleted macaques over  
452 infection (*right*). Circled populations indicate effector memory (EM) CD8 cells in nondepleted animals  
453 and EM CD4 cells in CD8-depleted animals. **(B)** Kinetics of EM CD8 activation, as measured by CD69  
454 expression. **(C)** CD8 T cell responses, as determined by intracellular cytokine staining (ICS) of PBMCs  
455 stimulated with viral peptides derived from the indicated ZIKV proteins. CD8 T cell responses were  
456 identified by co-positivity for perforin and IFN $\gamma$ . **(D)** Kinetics of EM CD4 activation, as measured by CD69  
457 expression. Linear mixed model (LMM) analysis:  $P = 0.001949$ . **(E)** Th1 responses, determined by ICS for  
458 IL-2 and IFN $\gamma$ . *Inset*: representative antigen-specific cytometry plots for HP17 at 30 dpi. **(F)** Neutralizing  
459 antibody titers in serum, represented as PRNT90. **(G)** Kinetics of B cell proliferation, measured by Ki67  
460 expression. LMM analysis:  $P = 0.004905$ .

#### 461 Fig 5

462 Enhanced viral dissemination and neuropathology in CD8-depleted macaques. **(A-C)** Viral loads in  
463 lymphatic, neural, reproductive tissues (A), CSF (B), and semen (C). **(D)** GH01 brainstem  
464 encephalomalacia. *Top left* and *top right*: area of encephalomalacia (dotted region). Adjacent to the area  
465 of malacia a cerebral vessel exhibits medial thickening (arrow). *Bottom left* and *bottom right*: within the  
466 area of malacia, swollen axons (spheroids, arrowhead) are seen within dilated myelin sheaths. In some  
467 myelin sheaths, axons are absent with infiltration by gitter cells (digestion chamber formation,  
468 asterisks). Gitter cells occasionally contain golden brown cytoplasmic pigment (arrow). **(E)** HP17 sciatic  
469 nerve and brainstem lesions. *Top left*: small vessels within the sciatic nerve are surrounded by low  
470 numbers of lymphocytes (arrows). H&E, 40x, bar = 20  $\mu$ m. *Top right*: a focal glial nodule is present within  
471 the gray matter of the brainstem (arrow). H&E, 10x, bar = 100  $\mu$ m. *Bottom left*: there is dilation of  
472 adjacent myelin sheaths and spheroid formation (arrowhead). H&E, 20x, bar = 50  $\mu$ m. *Bottom right*:  
473 zoom in from bottom left. H&E, 40x, =20  $\mu$ m.

#### 474 Fig S1

475 Comparison of viral loads and CBC data to previous female cohort. Data from previous cohort is shown  
476 in gray, and data from the present study is overlaid. **(A)** Viral RNA in serum over infection. **(B)** Viral loads  
477 in CSF. **(C)** NLR, derived using total neutrophil and lymphocyte counts in blood from CBC data. **(D)**  
478 Characteristic spike of neutrophils in nondepleted animals at 1 dpi. **(E)** Characteristic reduction of  
479 circulating lymphocytes in nondepleted animals at 1 dpi.

#### 480 Fig S2

481 Animal-specific transcriptional responses. Patterns of antiviral gene induction in whole blood at 1, 3, and  
482 15 dpi are represented for each animal individually.

#### 483 Fig S3

484 Comparison of antiviral gene expression in CD8+ and CD8- fractions of PBMC. Induction of the antiviral  
485 genes ISG15, OAS2, and DDX58 was analyzed in sorted CD8+ and CD8- fractions of PBMCs from a  
486 nondepleted animal at peak transcriptional activity. Graph indicates fold regulation relative to b-actin.



## 487 Fig S4

488 Modulation of monocyte phenotype by CD8 depletion. **(A-C)** Kinetics of monocyte activation, as  
489 measured by CD169 expression in classical (A), intermediate (B), and nonclassical (C) subsets. **(D)** Overall  
490 monocyte activation, as measured by CD69 expression. **(E-F)** Kinetics of monocyte CD95 MFI in  
491 nonclassical (E) and classical (F) subsets.

## 492 Fig S5

493 Adaptive immune cell immunophenotyping. **(A)** Frequencies of EM, central memory (CM), and naïve CD8  
494 subsets over infection. **(B)** Naïve CD8 cell activation (DR+) and proliferation (Ki67+). **(C)** Kinetics of CD8 $\alpha$   
495 MFI in total CD8 cells. **(D)** Frequencies of EM, CM, and naïve CD4 subsets over infection. **(E)** Naïve CD4  
496 cell activation (DR+) and proliferation (Ki67+). For Ki67 expression, LMM analysis:  $P = 0.005396$ . **(F)** CM  
497 CD4 cell activation (DR+) and proliferation (Ki67+). LMM analysis of Ki67:  $P = 0.003123$ . **(G)** Frequencies  
498 of total CD4 T cells over infection.

## 499 Bibliography

- 500 1. Plourde AR, Bloch EM. A Literature Review of Zika Virus. *Emerg Infect Dis.* 2016;22(7):1185-92.  
501 Epub 2016/04/14. doi: 10.3201/eid2207.151990. PubMed PMID: 27070380; PubMed Central PMCID:  
502 PMC4918175.
- 503 2. Lucas CGO, Kitoko JZ, Ferreira FM, Suzart VG, Papa MP, Coelho SVA, et al. Critical role of CD4+ T  
504 cells and IFN $\gamma$  signaling in antibody-mediated resistance to Zika virus infection. *Nat Commun.* 2018;9.  
505 doi: 10.1038/s41467-018-05519-4. PubMed PMID: 30087337; PubMed Central PMCID:  
506 PMC6081430.
- 507 3. Schmitz JE, Simon MA, Kuroda MJ, Lifton MA, Ollert MW, Vogel CW, et al. A nonhuman primate  
508 model for the selective elimination of CD8+ lymphocytes using a mouse-human chimeric monoclonal  
509 antibody. *Am J Pathol.* 1999;154(6):1923-32. doi: 10.1016/S0002-9440(10)65450-8. PubMed PMID:  
510 10362819; PubMed Central PMCID: PMC1866630.
- 511 4. Elong Ngonu A, Vizcarra EA, Tang WW, Sheets N, Joo Y, Kim K, et al. Mapping and Role of the  
512 CD8(+) T Cell Response During Primary Zika Virus Infection in Mice. *Cell Host Microbe.* 2017;21(1):35-46.  
513 Epub 2017/01/13. doi: 10.1016/j.chom.2016.12.010. PubMed PMID: 28081442; PubMed Central PMCID:  
514 PMC5234855.
- 515 5. Huang H, Li S, Zhang Y, Han X, Jia B, Liu H, et al. CD8+ T Cell Immune Response in  
516 Immunocompetent Mice during Zika Virus Infection. *J Virol.* 2017;91(22). doi: 10.1128/jvi.00900-17.  
517 PubMed PMID: 28835502; PubMed Central PMCID: PMC5660488.
- 518 6. Jurado KA, Yockey LJ, Wong PW, Lee S, Huttner AJ, Iwasaki A. Antiviral CD8 T cells induce Zika-  
519 virus-associated paralysis in mice. *Nat Microbiol.* 2018;3(2):141-7. Epub 2017/11/20. doi:  
520 10.1038/s41564-017-0060-z. PubMed PMID: 29158604; PubMed Central PMCID: PMC5780207.
- 521 7. Dudley DM, Aliota MT, Mohr EL, Weiler AM, Lehrer-Brey G, Weisgrau KL, et al. A rhesus  
522 macaque model of Asian-lineage Zika virus infection. *Nat Commun.* 2016;7:12204. Epub 2016/06/28.  
523 doi: 10.1038/ncomms12204. PubMed PMID: 27352279; PubMed Central PMCID: PMC4931337.
- 524 8. Magnani DM, Rogers TF, Maness NJ, Grubaugh ND, Beutler N, Bailey VK, et al. Fetal demise and  
525 failed antibody therapy during Zika virus infection of pregnant macaques. *Nat Commun.* 2018;9(1):1624.  
526 Epub 2018/04/24. doi: 10.1038/s41467-018-04056-4. PubMed PMID: 29691387; PubMed Central  
527 PMCID: PMC5915455.
- 528 9. Best K, Guedj J, Madelain V, de Lamballerie X, Lim SY, Osuna CE, et al. Zika plasma viral dynamics  
529 in nonhuman primates provides insights into early infection and antiviral strategies. *Proc Natl Acad Sci U*

- 530 S A. 2017;114(33):8847-52. Epub 2017/08/01. doi: 10.1073/pnas.1704011114. PubMed PMID:  
531 28765371; PubMed Central PMCID: PMC5565429.
- 532 10. Osuna CE, Lim SY, Deleage C, Griffin BD, Stein D, Schroeder LT, et al. Zika viral dynamics and  
533 shedding in rhesus and cynomolgus macaques. *Nat Med*. 2016;22(12):1448-55. Epub 2016/10/03. doi:  
534 10.1038/nm.4206. PubMed PMID: 27694931; PubMed Central PMCID: PMC5293594.
- 535 11. Gao Y, Wang WJ, Zhi Q, Shen M, Jiang M, Bian X, et al. Neutrophil/lymphocyte ratio is a more  
536 sensitive systemic inflammatory response biomarker than platelet/lymphocyte ratio in the prognosis  
537 evaluation of unresectable pancreatic cancer. *Oncotarget*. 2017;8(51):88835-44. Epub 2017/09/27. doi:  
538 10.18632/oncotarget.21340. PubMed PMID: 29179480; PubMed Central PMCID: PMC5687650.
- 539 12. Martinez J, Huang X, Yang Y. Direct action of type I IFN on NK cells is required for their activation  
540 in response to vaccinia viral infection in vivo. *J Immunol*. 2008;180(3):1592-7. PubMed PMID: 18209055.
- 541 13. Lum FM, Lee D, Chua TK, Tan JLL, Lee CYP, Liu X, et al. Zika Virus Infection Preferentially  
542 Counterbalances Human Peripheral Monocyte and/or NK Cell Activity. *mSphere*. 2018;3(2). Epub  
543 2018/03/28. doi: 10.1128/mSphereDirect.00120-18. PubMed PMID: 29600283; PubMed Central PMCID:  
544 PMC5874443.
- 545 14. O'Connor MA, Tisoncik-Go J, Lewis TB, Miller CJ, Bratt D, Moats CR, et al. Early cellular innate  
546 immune responses drive Zika viral persistence and tissue tropism in pigtail macaques. *Nat Commun*.  
547 2018;9(1):3371. Epub 2018/08/22. doi: 10.1038/s41467-018-05826-w. PubMed PMID: 30135445;  
548 PubMed Central PMCID: PMC6105614.
- 549 15. Amir e-A, Davis KL, Tadmor MD, Simonds EF, Levine JH, Bendall SC, et al. viSNE enables  
550 visualization of high dimensional single-cell data and reveals phenotypic heterogeneity of leukemia. *Nat*  
551 *Biotechnol*. 2013;31(6):545-52. Epub 2013/05/19. doi: 10.1038/nbt.2594. PubMed PMID: 23685480;  
552 PubMed Central PMCID: PMC4076922.
- 553 16. Hirsch AJ, Smith JL, Haese NN, Broeckel RM, Parkins CJ, Kreklywich C, et al. Zika Virus infection of  
554 rhesus macaques leads to viral persistence in multiple tissues. *PLoS Pathog*. 2017;13(3):e1006219. Epub  
555 2017/03/09. doi: 10.1371/journal.ppat.1006219. PubMed PMID: 28278237; PubMed Central PMCID:  
556 PMC5344528.
- 557 17. Coffey LL, Pesavento PA, Keesler RI, Singapuri A, Watanabe J, Watanabe R, et al. Zika Virus  
558 Tissue and Blood Compartmentalization in Acute Infection of Rhesus Macaques. *PLoS One*.  
559 2017;12(1):e0171148. Epub 2017/01/31. doi: 10.1371/journal.pone.0171148. PubMed PMID: 28141843;  
560 PubMed Central PMCID: PMC5283740.
- 561 18. Michel T, Hentges F, Zimmer J. Consequences of the crosstalk between  
562 monocytes/macrophages and natural killer cells. *Front Immunol*. 2012;3:403. Epub 2013/01/04. doi:  
563 10.3389/fimmu.2012.00403. PubMed PMID: 23316194; PubMed Central PMCID: PMC3539656.
- 564 19. Muñoz-Jordán JL, Fredericksen BL. How flaviviruses activate and suppress the interferon  
565 response. *Viruses*. 2010;2(2):676-91. Epub 2010/02/23. doi: 10.3390/v2020676. PubMed PMID:  
566 21994652; PubMed Central PMCID: PMC3185611.
- 567 20. Hamel R, Dejarnac O, Wichit S, Ekchariyawat P, Neyret A, Luplertlop N, et al. Biology of Zika Virus  
568 Infection in Human Skin Cells. *J Virol*. 2015;89(17):8880-96. Epub 2015/06/17. doi: 10.1128/JVI.00354-  
569 15. PubMed PMID: 26085147; PubMed Central PMCID: PMC4524089.
- 570 21. Foo SS, Chen W, Chan Y, Bowman JW, Chang LC, Choi Y, et al. Asian Zika virus strains target  
571 CD14+ blood monocytes and induce M2-skewed immunosuppression during pregnancy. *Nat Microbiol*.  
572 2017;2(11):1558-70. doi: 10.1038/s41564-017-0016-3. PubMed PMID: 28827581; PubMed Central  
573 PMCID: PMC5678934.
- 574 22. Michlmayr D, Andrade P, Gonzalez K, Balmaseda A, Harris E. CD14+CD16+ monocytes are the  
575 main target of Zika virus infection in peripheral blood mononuclear cells in a paediatric study in  
576 Nicaragua. *Nat Microbiol*. 2017;2(11):1462-70. doi: 10.1038/s41564-017-0035-0. PubMed PMID:  
577 28970482; PubMed Central PMCID: PMC5997390.

- 578 23. Hirsch AJ, Roberts VHJ, Grigsby PL, Haese N, Schabel MC, Wang X, et al. Zika virus infection in  
579 pregnant rhesus macaques causes placental dysfunction and immunopathology. *Nat Commun.*  
580 2018;9(1):263. Epub 2018/01/17. doi: 10.1038/s41467-017-02499-9. PubMed PMID: 29343712; PubMed  
581 Central PMCID: PMC5772047.
- 582 24. Sewald X, Ladinsky MS, Uchil PD, Beloor J, Pi R, Herrmann C, et al. Retroviruses use CD169-  
583 mediated trans-infection of permissive lymphocytes to establish infection. *Science.* 2015;350(6260):563-  
584 7. Epub 2015/10/01. doi: 10.1126/science.aab2749. PubMed PMID: 26429886; PubMed Central PMCID:  
585 PMC4651917.
- 586 25. van Dinther D, Veninga H, Iborra S, Borg EGF, Hoogterp L, Olesek K, et al. Functional CD169 on  
587 Macrophages Mediates Interaction with Dendritic Cells for CD8. *Cell Rep.* 2018;22(6):1484-95. doi:  
588 10.1016/j.celrep.2018.01.021. PubMed PMID: 29425504.
- 589 26. Pardy RD, Rajah MM, Condotta SA, Taylor NG, Sagan SM, Richer MJ. Analysis of the T Cell  
590 Response to Zika Virus and Identification of a Novel CD8+ T Cell Epitope in Immunocompetent Mice.  
591 *PLoS Pathog.* 2017;13(2):e1006184. Epub 2017/02/23. doi: 10.1371/journal.ppat.1006184. PubMed  
592 PMID: 28231312; PubMed Central PMCID: PMC5322871.
- 593 27. Grifoni A, Pham J, Sidney J, O'Rourke PH, Paul S, Peters B, et al. Prior Dengue virus exposure  
594 shapes T cell immunity to Zika virus in humans. *J Virol.* 2017. Epub 2017/10/04. doi: 10.1128/JVI.01469-  
595 17. PubMed PMID: 28978707; PubMed Central PMCID: PMC5709580.
- 596 28. Vesnaver TV, Tul N, Mehrabi S, Parissone F, Štrafela P, Mlakar J, et al. Zika virus associated  
597 microcephaly/micrencephaly-fetal brain imaging in comparison with neuropathology. *BJOG.*  
598 2017;124(3):521-5. Epub 2016/11/24. doi: 10.1111/1471-0528.14423. PubMed PMID: 27885789.
- 599 29. Driggers RW, Ho CY, Korhonen EM, Kuivanen S, Jääskeläinen AJ, Smura T, et al. Zika Virus  
600 Infection with Prolonged Maternal Viremia and Fetal Brain Abnormalities. *N Engl J Med.*  
601 2016;374(22):2142-51. Epub 2016/03/30. doi: 10.1056/NEJMoa1601824. PubMed PMID: 27028667.
- 602 30. Garman RH. Histology of the central nervous system. *Toxicol Pathol.* 2011;39(1):22-35. Epub  
603 2010/11/30. doi: 10.1177/0192623310389621. PubMed PMID: 21119051.
- 604 31. Cumberworth SL, Barrie JA, Cunningham ME, de Figueiredo DPG, Schultz V, Wilder-Smith AJ, et  
605 al. Zika virus tropism and interactions in myelinating neural cell cultures: CNS cells and myelin are  
606 preferentially affected. *Acta Neuropathol Commun.* 2017;5(1):50. Epub 2017/06/23. doi:  
607 10.1186/s40478-017-0450-8. PubMed PMID: 28645311; PubMed Central PMCID: PMC5481922.
- 608 32. Lieberman MM, Nerurkar VR, Luo H, Cropp B, Carrion R, de la Garza M, et al. Immunogenicity  
609 and protective efficacy of a recombinant subunit West Nile virus vaccine in rhesus monkeys. *Clin Vaccine*  
610 *Immunol.* 2009;16(9):1332-7. Epub 2009/07/29. doi: 10.1128/00119-09. PubMed PMID: 19641099;  
611 PubMed Central PMCID: PMC2745014.
- 612 33. Ward MJ, Alger J, Berrueta M, Bock H, Buekens P, Cafferata ML, et al. Zika Virus and the World  
613 Health Organization Criteria for Determining Recent Infection Using Plaque Reduction Neutralization  
614 Testing. *Am J Trop Med Hyg.* 2018;99(3):780-2. Epub 2018/06/21. doi: 10.4269/ajtmh.18-0237. PubMed  
615 PMID: 29943723.
- 616 34. R Core Team. R: A language and environment for statistical computing. Vienna, Austria: R  
617 Foundation for Statistical Computing; 2018.
- 618 35. Bates D, Maechler M, Bolker B, Walker S. Fitting Linear Mixed-Effects Models Using lme4.  
619 *Journal of Statistical Software*; 2015.

# Figure 1: Delayed serum viremia and altered leukocyte kinetics in CD8-depleted macaques

bioRxiv preprint doi: <https://doi.org/10.1101/475418>; this version posted November 20, 2018. The copyright holder for this preprint (which was not certified by peer review) is the author/funder, who has granted bioRxiv a license to display the preprint in perpetuity. It is made available under aCC-BY-NC-ND 4.0 International license.

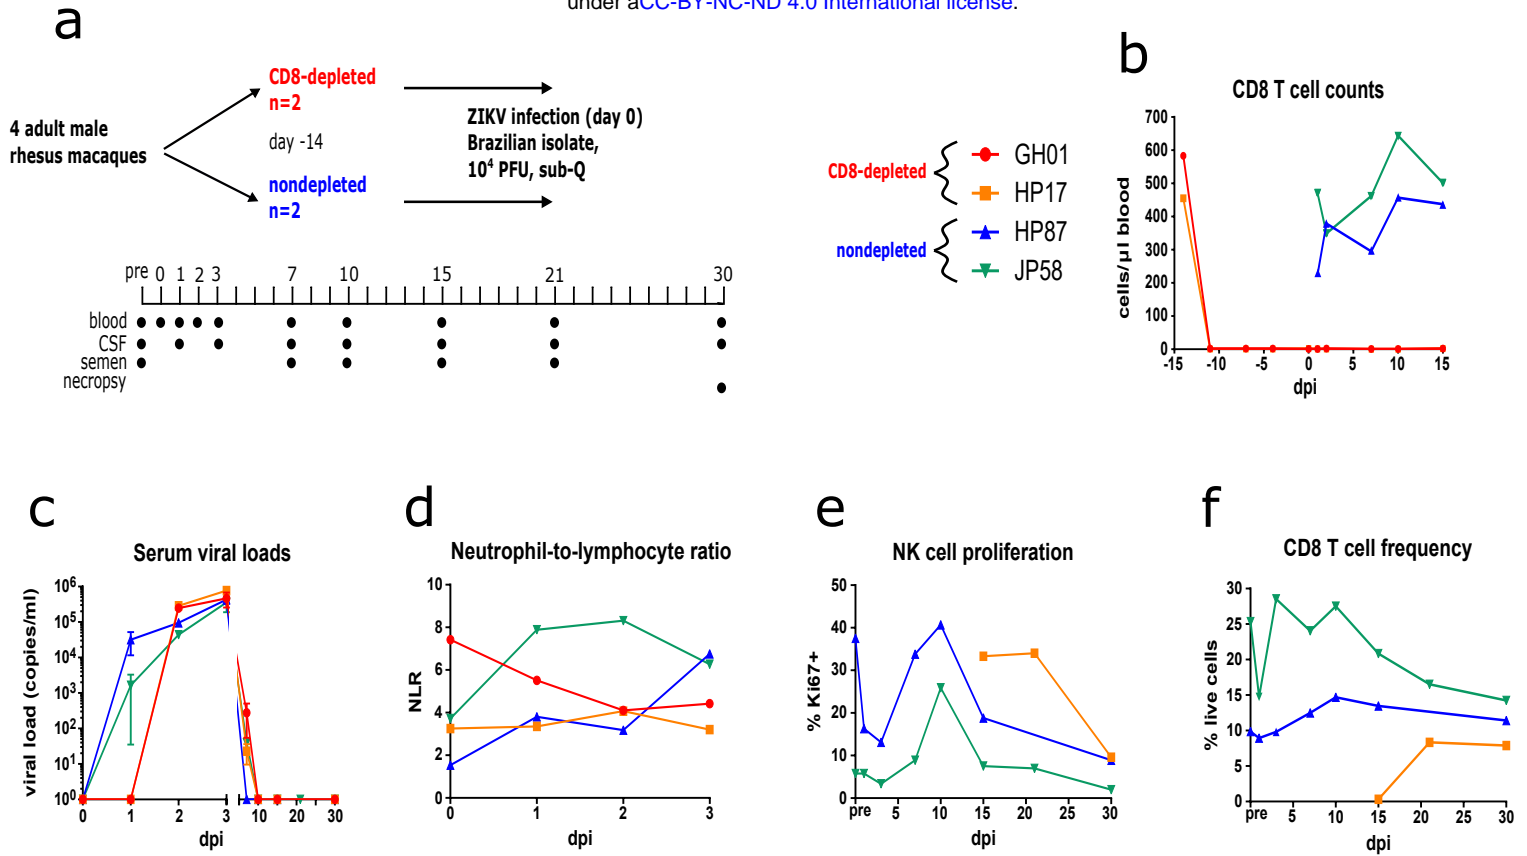

# Fig 2: Quelled antiviral gene expression in whole blood of CD8-depleted macaques

bioRxiv preprint doi: <https://doi.org/10.1101/475418>; this version posted November 20, 2018. The copyright holder for this preprint (which was not certified by peer review) is the author/funder, who has granted bioRxiv a license to display the preprint in perpetuity. It is made available under aCC-BY-NC-ND 4.0 International license.

a

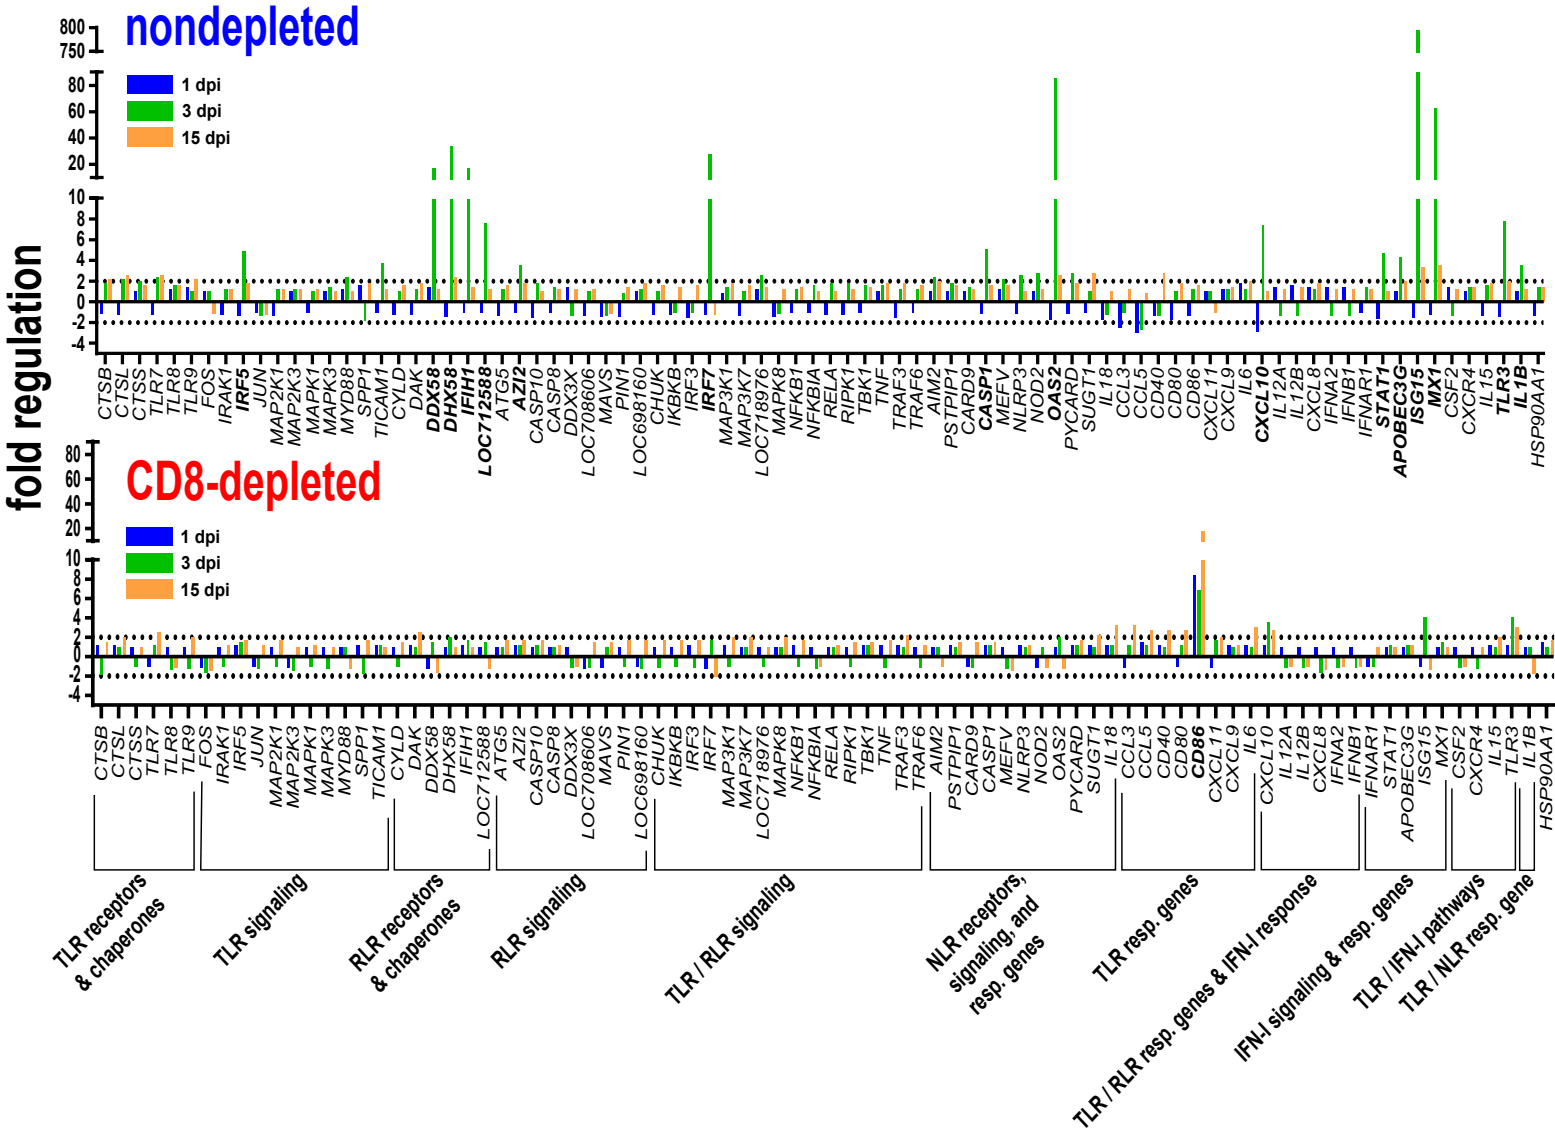

b

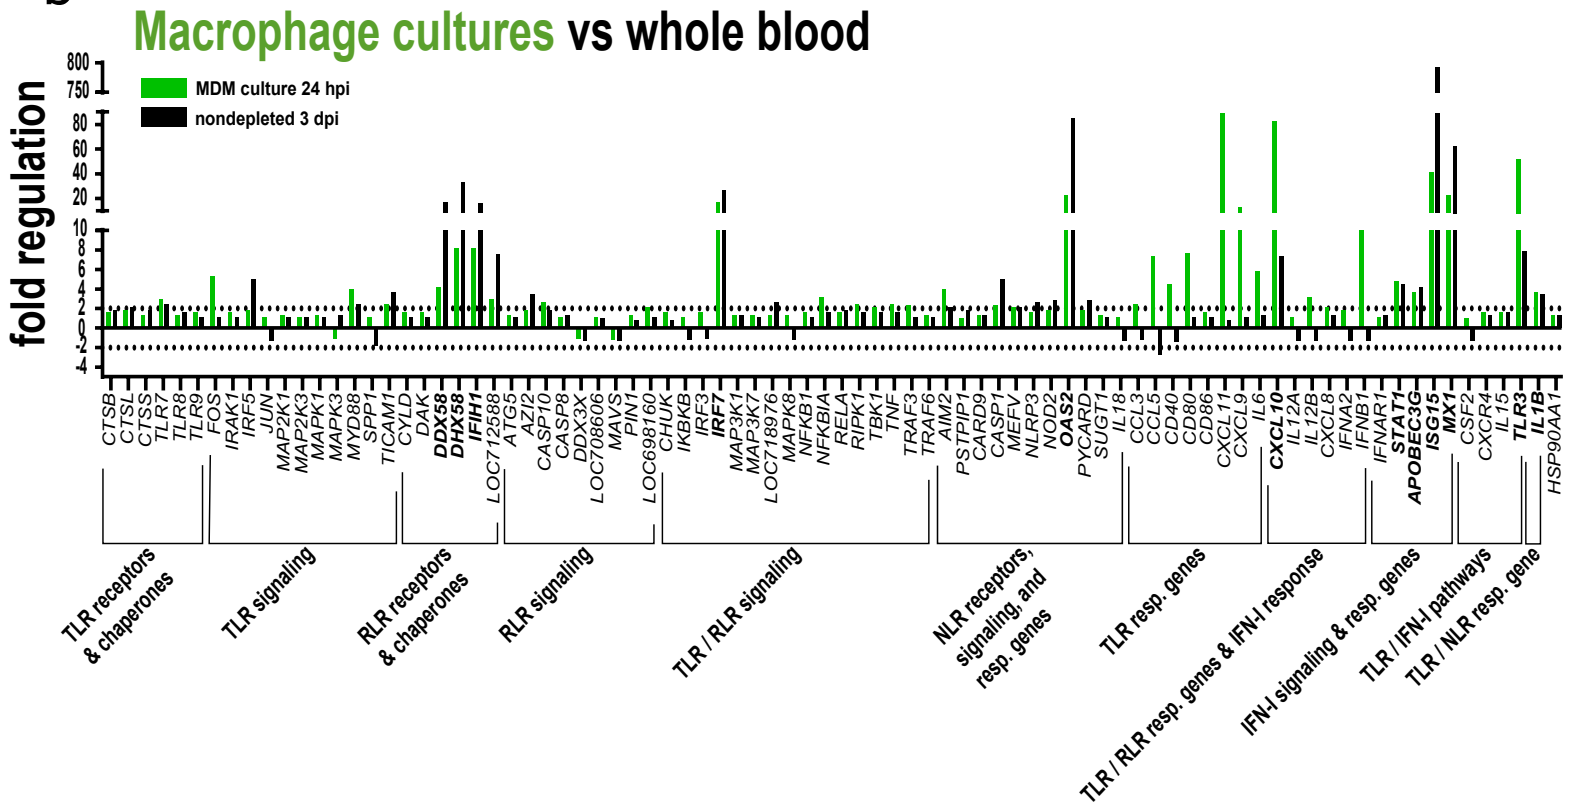



# Fig 3: Altered patterns of monocyte activation and frequency in CD8-depleted macaques

bioRxiv preprint doi: <https://doi.org/10.1101/475418>; this version posted November 20, 2018. The copyright holder for this preprint (which was not certified by peer review) is the author/funder, who has granted bioRxiv a license to display the preprint in perpetuity. It is made available under aCC-BY-NC-ND 4.0 International license.

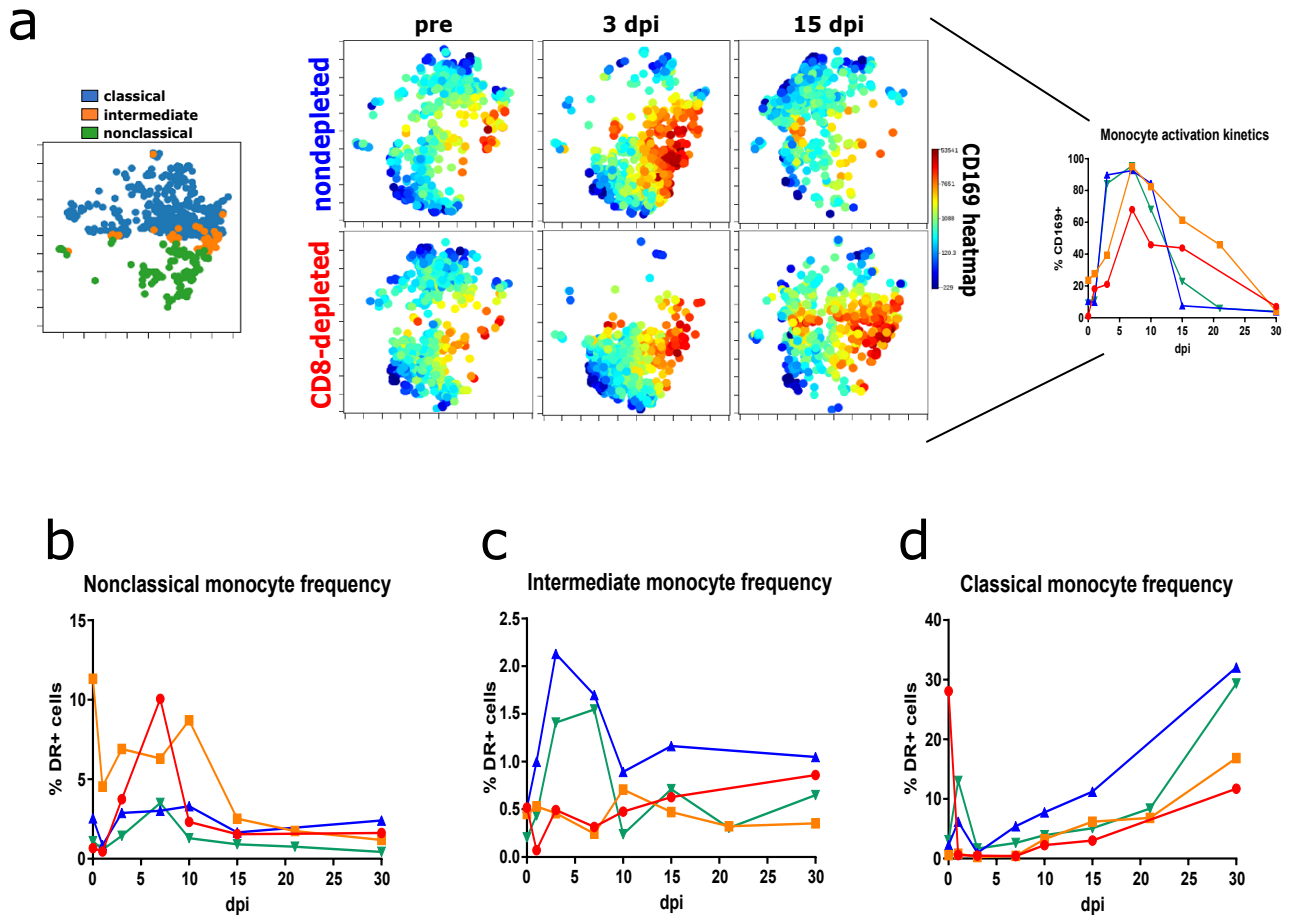

# Fig 4: Possible compensatory CD4 and humoral responses in CD8-depleted macaques

bioRxiv preprint doi: <https://doi.org/10.1101/475418>; this version posted November 20, 2018. The copyright holder for this preprint (which was not certified by peer review) is the author/funder, who has granted bioRxiv a license to display the preprint in perpetuity. It is made available under aCC-BY-NC-ND 4.0 International license.

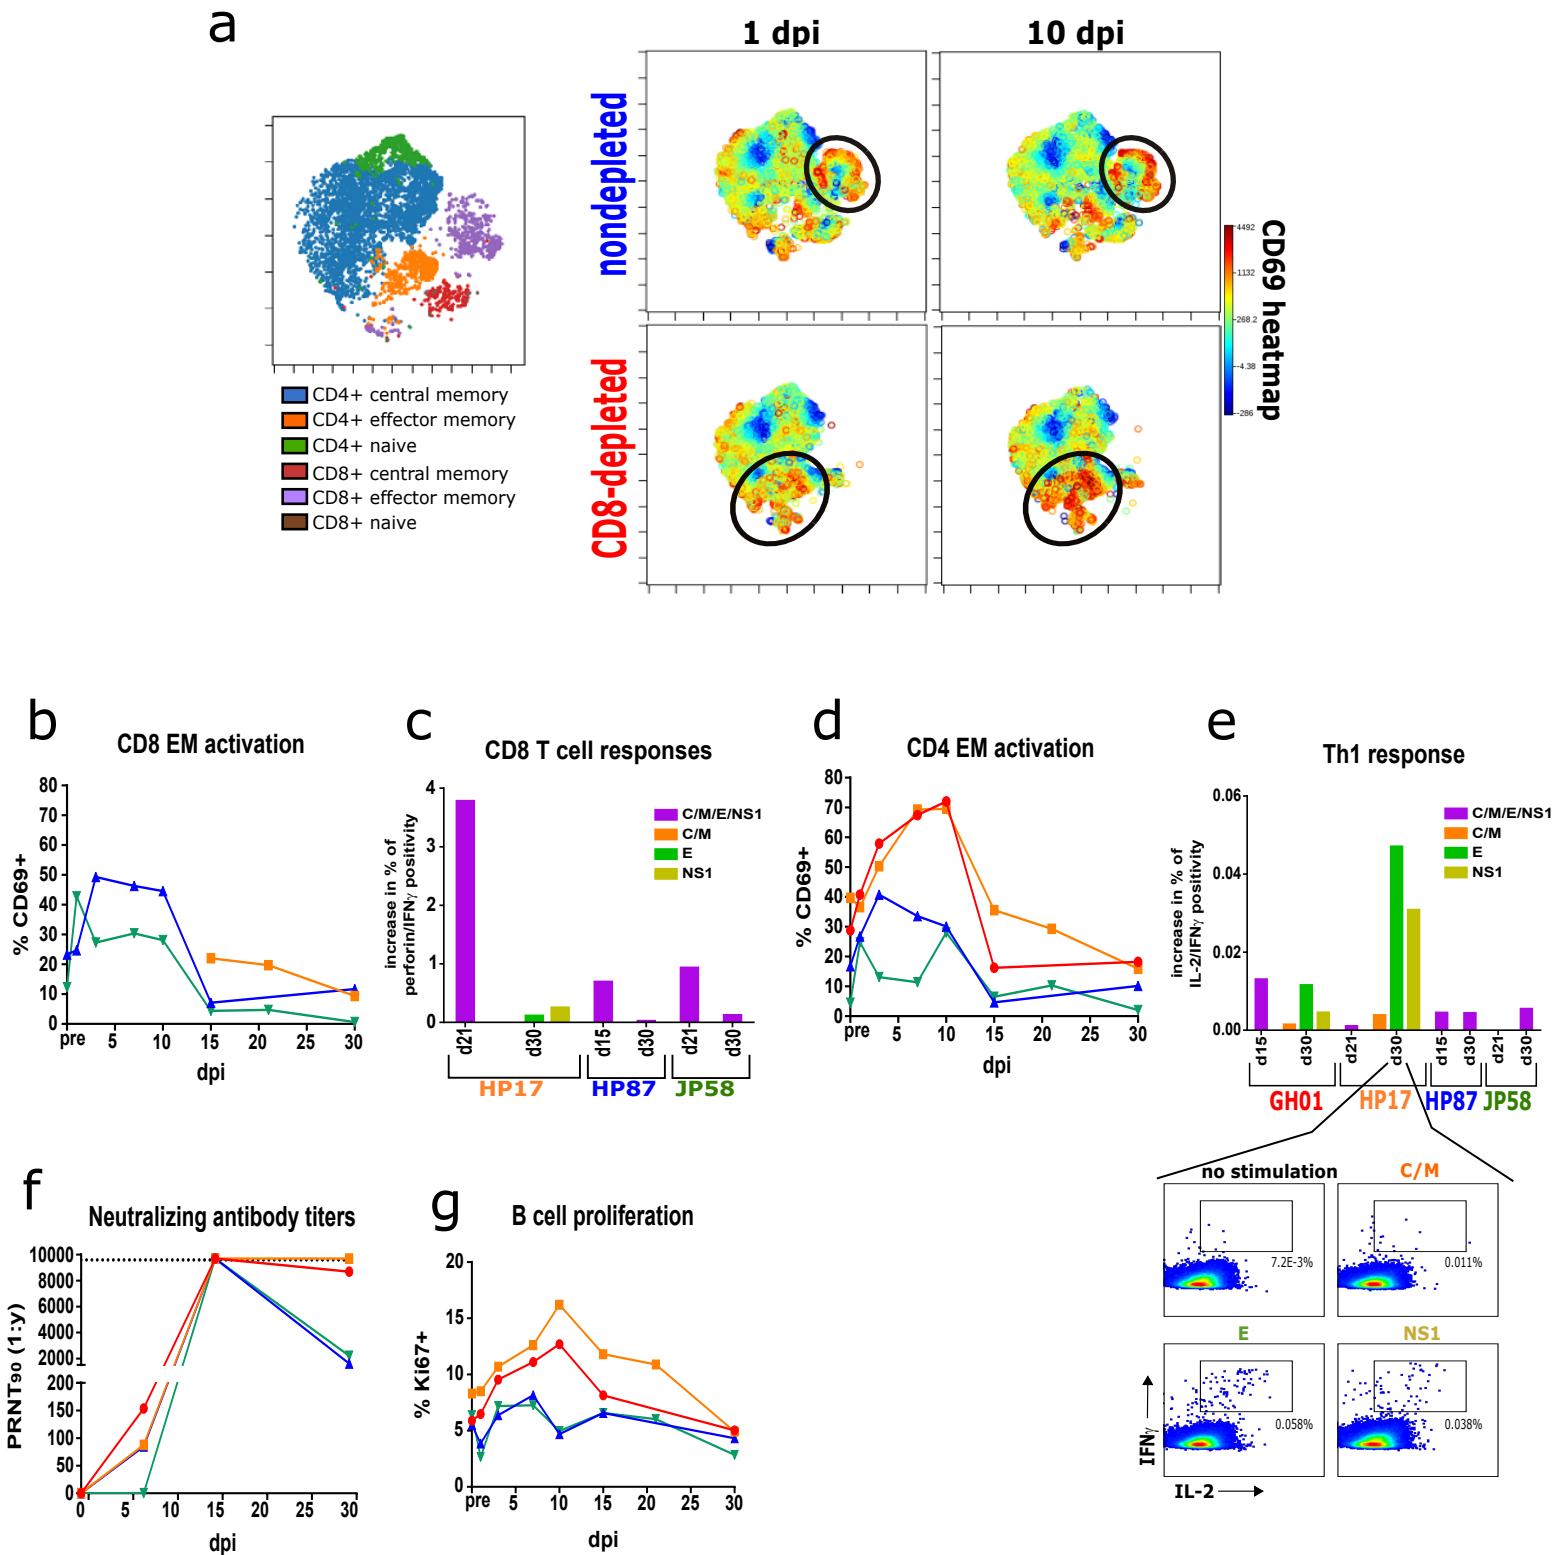

# Fig 5: Enhanced viral dissemination and neuropathology in CD8-depleted macaques

bioRxiv preprint doi: <https://doi.org/10.1101/475418>; this version posted November 20, 2018. The copyright holder for this preprint (which was not certified by peer review) is the author/funder, who has granted bioRxiv a license to display the preprint in perpetuity. It is made available under aCC-BY-NC-ND 4.0 International license.

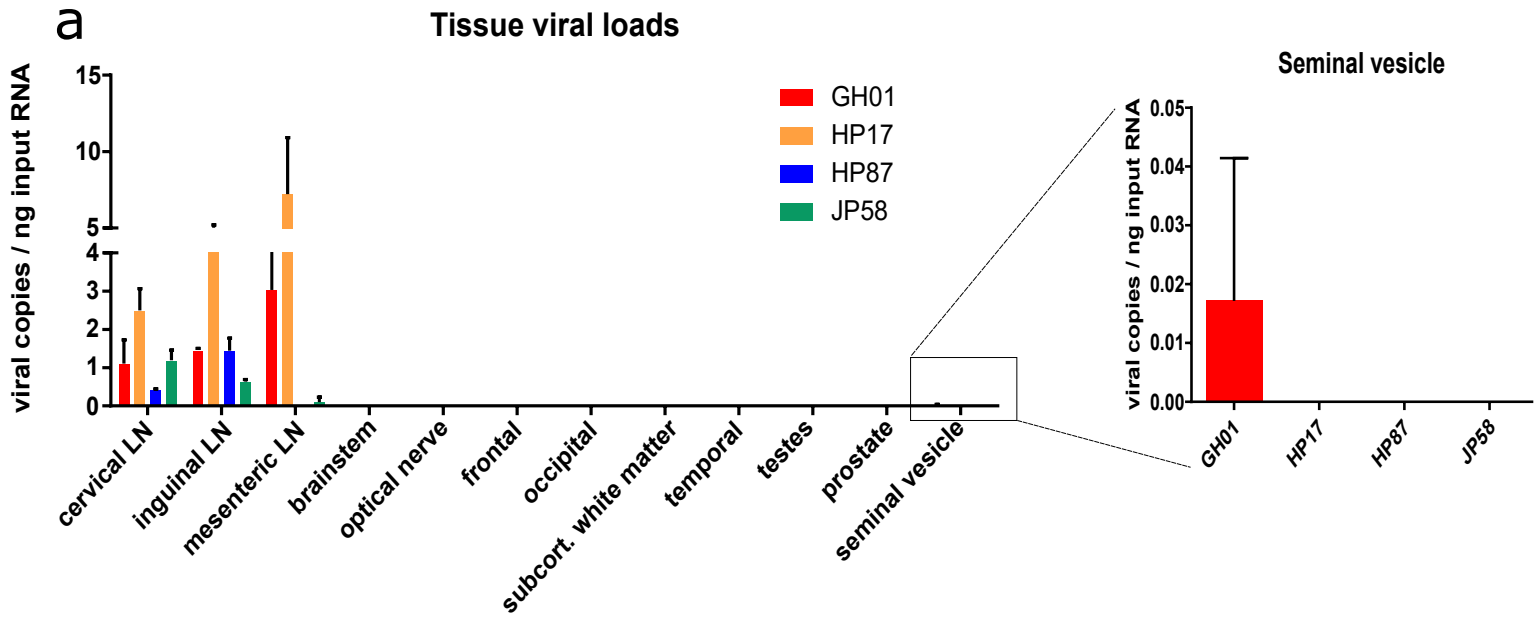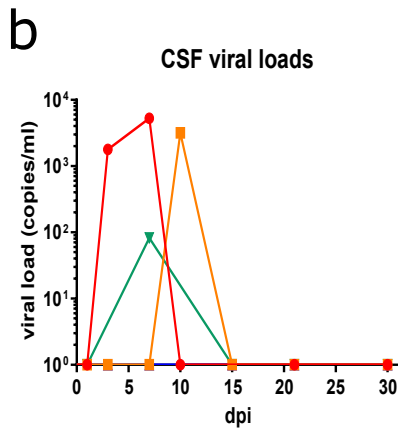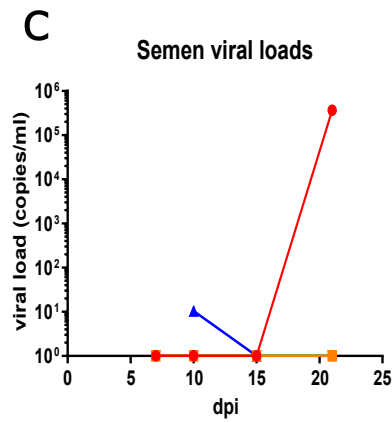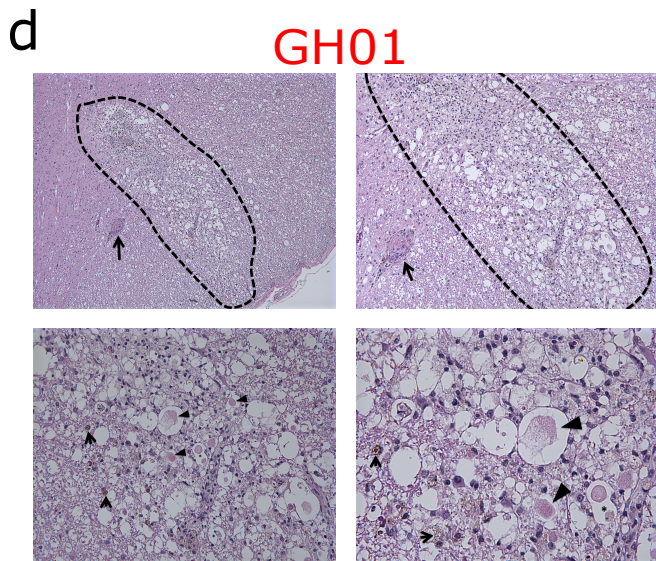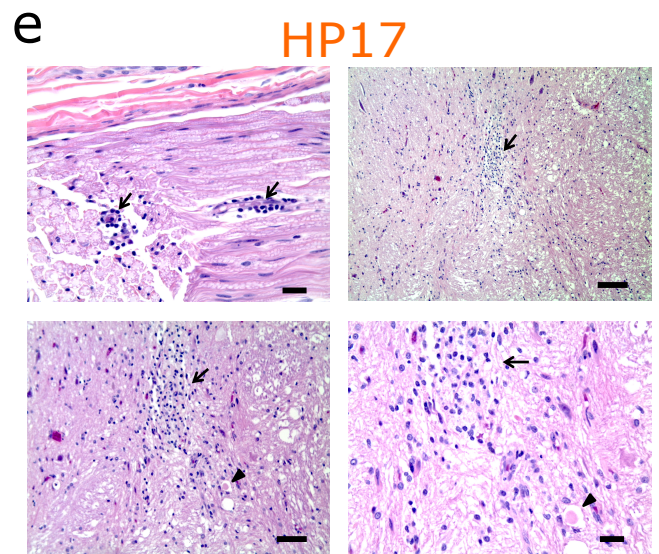

Source: https://www.biorxiv.org/content/10.1101/475418v1.full.pdf
