1 CD8+ lymphocytes modulate Zika virus dynamics and tissue dissemination and orchestrate antiviral immunity

2

3

4 Blake Schouest<sup>1,2</sup>, Marissa Fahlberg<sup>3</sup>, Elizabeth A. Scheef<sup>2</sup>, Matthew J. Ward<sup>4</sup>, Kyra Headrick<sup>4</sup>, Dawn M. Szeltner<sup>2</sup>,  
5 Robert V. Blair<sup>5</sup>, Margaret H. Gilbert<sup>6</sup>, Lara A. Doyle-Meyers<sup>6</sup>, Victoria W. Danner<sup>6</sup>, Myrna C. Bonaldo<sup>7</sup>, Dawn M.  
6 Wesson<sup>4</sup>, Antonito T. Panganiban<sup>2,8</sup>, Nicholas J. Maness<sup>2,8\*</sup>

7

8

9 <sup>1</sup>Biomedical Sciences Training Program, Tulane University School of Medicine, New Orleans LA 70112

10 <sup>2</sup>Division of Microbiology, Tulane National Primate Research Center, Covington LA 70433

11 <sup>3</sup>Division of Immunology, Tulane National Primate Research Center, Covington LA 70433

12 <sup>4</sup>School of Public Health and Tropical Medicine, Tulane University, New Orleans LA 70112

13 <sup>5</sup>Division of Comparative Pathology, Tulane National Primate Research Center, Covington LA 70433

14 <sup>6</sup>Division of Veterinary Medicine, Tulane National Primate Research Center, Covington LA 70433

15 <sup>7</sup>Laboratório de Biologia Molecular de Flavivírus, Instituto Oswaldo Cruz, Fiocruz, Rio de Janeiro, RJ, Brazil

16 <sup>8</sup>Department of Microbiology and Immunology, Tulane University School of Medicine, New Orleans LA 70112

17 \*Corresponding author, Nicholas J Maness, [nmaness@tulane.edu](mailto:nmaness@tulane.edu)

18

19

## 20 **Abstract**

21 CD8+ lymphocytes are critically important in the control of viral infections, but their roles in acute Zika  
22 virus (ZIKV) infection remain incompletely explored in a model sufficiently similar to humans  
23 immunologically. Here, we use CD8+ lymphocyte depletion to dissect acute immune responses in adult  
24 male rhesus and cynomolgus macaques infected with ZIKV. CD8 depletion delayed serum viremia and  
25 dysregulated patterns of innate immune cell homing and monocyte-driven transcriptional responses in the  
26 blood. CD8-depleted macaques also showed evidence of compensatory adaptive immune responses, with  
27 elevated Th1 activity and persistence of neutralizing antibodies beyond the clearance of serum viremia.  
28 The absence of CD8+ lymphocytes increased viral burdens in lymphatic tissues, semen, and cerebrospinal  
29 fluid, and neural lesions were also evident in both CD8-depleted rhesus macaques. Together, these data  
30 support a role for CD8+ lymphocytes in the control of ZIKV dissemination and in maintaining immune  
31 regulation during acute infection of nonhuman primates.

32

## 33 Introduction

34 ZIKV has been a known pathogen for over half a century <sup>1</sup>, but severe manifestations of the disease were  
35 not directly associated with the virus for most of its history. Although recent outbreaks of ZIKV in the  
36 Western hemisphere are notorious for neurological complications including congenital Zika syndrome  
37 (CZS) and Guillain-Barré syndrome (GBS), most cases remain asymptomatic, and when symptoms arise,  
38 they are usually mild and self-limiting <sup>2</sup>. Differential immune responses to ZIKV infection may dictate the  
39 severity of accompanying diseases and underlie clinical outcomes.

40 As the immunological correlates of protection against ZIKV are beginning to be explored, the CD8 T cell  
41 response is emerging as an important mediator of viral control, as is true with other flaviviruses <sup>3</sup>. Studies  
42 in mice have identified CD8 T cell responses to ZIKV infection, but the induction of ZIKV-associated  
43 pathology in these models requires deficiency in type-I interferon (IFN) signaling <sup>4,5</sup>, which is not  
44 representative of natural ZIKV infection in humans. This is perhaps an unavoidable caveat, as ZIKV is  
45 incapable of antagonizing type-I IFN signaling in mice as it does in humans due to a lack of recognition  
46 of murine STAT2 by ZIKV NS5 <sup>6</sup>. Disrupting IFN-I signaling, either genetically or through antibody  
47 blockade is, therefore, necessary to recapitulate ZIKV neurotropism in mouse models. Importantly, these  
48 studies have described dual protective and deleterious effects of CD8 T cell responses in ZIKV infected  
49 mice. While CD8+ lymphocyte infiltration appears to reduce viral burdens in the brain, spinal cord and  
50 lymphatic tissue <sup>4,5</sup>, under certain circumstances, CD8+ influx may also promote immunopathology,  
51 evidenced by neural damage and paralysis <sup>7</sup>. However, these findings have yet to be replicated in a model  
52 sufficiently similar to humans genetically and immunologically. Given the recent development of rhesus  
53 <sup>8-12</sup> and cynomolgus <sup>12,13</sup> macaque models of ZIKV infection, we sought to explore the role of CD8+  
54 lymphocytes in acute ZIKV infection by way of CD8+ lymphocyte depletion. CD8+ depletion is a well-  
55 established immune manipulation in nonhuman primates <sup>14</sup> and is thus a plausible approach to gauge how  
56 the absence of CD8+ cells impacts acute viremia and potentially modulates adaptive responses.

57 In the present study, we infected four adult male rhesus macaques and five adult male cynomolgus  
58 macaques with a minimally passaged Brazilian ZIKV strain. Prior to infection, two animals of each  
59 species were depleted of CD8<sup>+</sup> lymphocytes, including CD8 T cells and NK cells. The absence of CD8<sup>+</sup>  
60 lymphocytes resulted in striking virus-response patterns that were not evident in nondepleted macaques,  
61 including delayed serum viremia, enhanced viral dissemination to peripheral tissues, and global  
62 repression of antiviral gene transcription. CD8-depleted rhesus macaques also manifested brainstem  
63 lesions that were characterized by increased inflammation. Finally, the absence of CD8<sup>+</sup> lymphocytes  
64 appeared to alter patterns of monocyte expansion and activation and induce compensatory adaptive  
65 responses, characterized by enhanced Th1 phenotypes and prolonged neutralizing antibody production.

## 66 **Results**

### 67 **Delayed serum viremia and altered leukocyte kinetics**

68 CD8<sup>+</sup> lymphocyte depletion commenced 14 days prior to ZIKV infection (Fig. 1a), and CD8 T cells were  
69 undetectable in all depleted animals well before infection (Fig. 1b). To achieve CD8 depletion, we used  
70 the MT807R1 antibody<sup>14</sup> to target CD8 $\alpha$ , effectively depleting CD8 T cells (Fig. 1b & Supplementary  
71 Fig. 1a), CD8<sup>+</sup>/CD4<sup>+</sup> double-positive T cells (Supplementary Fig. 1b), and NK cells (Fig. 1c) but not  
72 CD4 T cells (Supplementary Fig. 1c) from the blood of all treated animals. As MT807R1 targets NK cells  
73 in addition to CD8<sup>+</sup> lymphocytes, any deficiency in host response following treatment with anti-CD8 $\alpha$   
74 could indicate that either or both types of cells are important for acute control of ZIKV. Flow cytometric  
75 analysis of NK cell frequency in nondepleted animals revealed expansion early in infection (Fig. 1c).  
76 Intriguingly, the CD8-depleted macaque R64357 recovered NK cells and CD8 T cells at later timepoints,  
77 between 15 and 21 days post-infection (dpi) (Fig. 1c & Supplementary Fig. 1a).  
78 Following subcutaneous inoculation with ZIKV, nondepleted animals and a single CD8-depleted  
79 cynomolgus macaque experienced rapid serum viremia of 3-4.5 logs at 1 dpi (Fig. 1d), consistent with  
80 previous reports of ZIKV in both rhesus and cynomolgus macaques<sup>8,13,15</sup>. Strikingly, serum viremia in 3

81 of 4 CD8-depleted macaques was delayed until 2 dpi, when viral RNA was higher than in nondepleted  
82 animals (Fig. 1d). Viremia was also delayed until 3 dpi in C46456 (Fig. 1d), a nondepleted cynomolgus  
83 macaque that had been previously splenectomized. Perhaps importantly, the spleen is a major site of  
84 replication and spread of the related mosquito-borne flaviviruses dengue virus (DENV)<sup>16</sup> and West Nile  
85 virus (WNV)<sup>17</sup> and is also an immense reservoir of monocytes<sup>18</sup>, which are permissive to ZIKV  
86 replication in humans<sup>19</sup> and macaques<sup>20</sup>. The lack of a spleen in C46456 might have precluded ZIKV  
87 replication in this important target organ, thereby delaying viral kinetics.

88 By 7 dpi, serum viremia persisted in the CD8-depleted cynomolgus macaques in addition to the mock-  
89 depleted control, while viremia was undetected in both nondepleted animals of the cohort (Fig. 1d). For  
90 the remainder of the study, viral kinetics were similar among cohorts and treatment conditions, peaking at  
91 3 dpi and dropping to undetectable levels by 10 dpi and beyond (Fig. 1d). This was again in exception to  
92 C46456, which showed a small viral rebound at 10 dpi. A previous cohort of female macaques infected  
93 with the identical strain of ZIKV demonstrated similar patterns of serum viremia to those observed in  
94 nondepleted animals (Supplementary Fig. 2a).

95 The previous female cohort also showed consistent patterns of innate immune cell recruitment in the  
96 blood one day following ZIKV infection, summarized by the biomarker neutrophil-to-lymphocyte ratio  
97 (NLR)<sup>21</sup>. Patterns of leukocyte mobilization included a spike in neutrophil frequency (Supplementary  
98 Fig. 2c) and a simultaneous drop in lymphocyte frequency (Supplementary Fig. 2d), resulting in an  
99 elevated NLR at 1 dpi (Supplementary Fig. 2e). These findings were generally recapitulated in  
100 nondepleted animals but not in CD8-depleted animals (Figs. 1e-f and Supplementary Figs. 2c-e),  
101 potentially linking NLR and acute serum viremia. This association is strengthened by prototypical  
102 patterns of leukocyte homing in C78777 (Fig. 1e), the only CD8-depleted macaque with serum viremia at  
103 1 dpi (Fig. 1d).

## 104 **Differential monocyte-driven transcriptional profiles**

105 To characterize immune responses that might be differentiating patterns of viremia and leukocyte  
106 mobilization, we used the NanoString platform to quantify the expression of macaque immune-related  
107 genes in whole blood. CD8-depleted and nondepleted animals showed highly divergent profiles in genes  
108 related to IFN $\alpha$  signaling (Fig. 2a) and leukocyte homing (Supplementary Fig. 3a), resulting in the robust  
109 induction of disease-related pathways in nondepleted macaques that failed to activate in animals lacking  
110 CD8+ lymphocytes (Supplementary Fig. 3b). To confirm the transcriptional quiescence evident in CD8-  
111 depleted macaques, we used a quantitative real-time PCR (qRT-PCR) array of 84 antiviral genes in the  
112 rhesus macaque genome. Consistent with the NanoString results, nondepleted rhesus and cynomolgus  
113 macaques showed strong induction of several RIG-I like receptors (RLRs) and type-I IFN stimulated  
114 genes (ISGs) at 3 dpi, synchronous with peak serum viremia (Fig. 2b). The most highly induced genes  
115 include the pattern recognition receptors *TLR3*, *DDX58* (also known as *RIG-I*), and *IFIH1* (also known as  
116 *MDA5*), as well as the ISGs *ISG15*, *MX1*, and *OAS2*. Principal component analysis (PCA) of antiviral  
117 signaling further discriminated the transcriptional phenotypes in CD8-depleted and nondepleted animals  
118 (Fig. 2c). The induction of antiviral genes in nondepleted rhesus macaques was highest at 3 dpi and was  
119 generally followed by a return to near-baseline expression by 15 dpi (Supplementary Fig. 3c). In contrast  
120 to nondepleted animals, CD8-depleted macaques showed a virtual absence of transcriptional responses in  
121 whole blood at all timepoints tested (Figs. 2a-b and Supplementary Fig. 3d).

122 Although we suspected monocytes to be driving antiviral gene expression owing to their susceptibility to  
123 ZIKV infection<sup>19,20</sup>, an important caveat of probing whole blood is that the identity of the  
124 transcriptionally responsive cell types is unknown. To resolve cell populations contributing to antiviral  
125 signaling in blood, we sorted CD14+ monocytes from peripheral blood mononuclear cells (PBMCs) at 3  
126 dpi and profiled their expression of immune genes. Probe hybridization revealed selective antiviral gene  
127 expression in the monocytes of a nondepleted macaque and showed that even purified and sorted PBMCs  
128 from a CD8-depleted animal fail to establish transcriptional responses at peak serum viremia (Fig. 2d).

129 These findings were verified by qRT-PCR (Fig. 2e). Nonetheless, it remained possible that the lack of a  
130 transcriptional response in CD8-depleted macaques could have been attributed in part to an absence of  
131 otherwise responding NK cells. Sorting transcriptionally responsive PBMCs from a nondepleted rhesus  
132 macaque into CD8<sup>+</sup> and CD8<sup>-</sup> fractions, we found similar levels of gene induction in both populations,  
133 although expression was marginally higher in the CD8<sup>-</sup> subset, and transcription of *DDX58* was almost  
134 exclusive to CD8<sup>-</sup> cells (Fig. 2f). Gene induction in CD8<sup>+</sup> cells indicates that NK cells may indeed  
135 contribute to antiviral signaling, but similar transcriptional activation in the CD8<sup>-</sup> fraction affirms that the  
136 absence of transcriptional activation in CD8-depleted animals was not simply the product of a lack of NK  
137 cells.

138 To further explore innate immune activation in ZIKV-infected myeloid cells, we cultured monocyte-  
139 derived macrophages (MDMs) from ZIKV-naïve rhesus macaques *in vitro*, infected the macrophages  
140 with ZIKV, and profiled antiviral gene expression using qRT-PCR. We found highly overlapping  
141 transcriptional patterns to those observed in the blood of nondepleted macaques at 3 dpi (Fig. 2g),  
142 suggesting that ZIKV-permissive myeloid cells may be driving antiviral gene induction *in vivo*.

### 143 **Altered monocyte activation and frequency**

144 Divergent transcriptional patterns in CD8-depleted and nondepleted macaques could be induced by  
145 differentially responding monocytes, given that monocytes are known targets of ZIKV infection<sup>20,22</sup> and  
146 contribute to antiviral signaling during ZIKV infection<sup>22</sup>. To interrogate the immunophenotypic effects of  
147 CD8 depletion, we developed a multicolor flow cytometry panel to track innate and adaptive immune  
148 cells over time. The resulting data were highly dimensional, comprising a variety of surface markers and  
149 sampling animals at multiple timepoints and with respect to different treatment groups. To survey general  
150 immune responses over time, we used an adaptation of t-distributed stochastic neighbor embedding  
151 (tSNE), viSNE<sup>23</sup>.

152 In both rhesus and cynomolgus macaques, CD8 depletion dysregulated the kinetics of monocyte  
153 activation as measured by CD169 (siglec-1) expression. Nondepleted rhesus and cynomolgus macaques  
154 showed early activation of monocytes, peaking at 3 dpi and returning sharply to baseline by 14-15 dpi  
155 (Figs. 3a-c). Upregulation of CD169 in nondepleted animals was affirmed at the RNA level (Fig. 2a).  
156 Although patterns of CD169 induction were consistent in all monocyte subsets (Supplementary Figs. 4a-  
157 c), viSNE analysis indicated that CD169 was most highly expressed on intermediate and nonclassical  
158 monocytes in both cohorts (Figs. 3a-b). Contrasting nondepleted animals, CD8-depleted rhesus and  
159 cynomolgus macaques showed less well-defined monocyte activation at 3 dpi, which was accompanied in  
160 rhesus macaques by prolonged monocyte activation beyond 15 dpi (Figs. 3a-c & Supplementary Figs. 4a-  
161 d). These findings were consistent transcriptionally, as whole blood from CD8-depleted animals had  
162 muted expression of genes related to myeloid cell activation (Fig. 3d). Monocyte subsets showed  
163 additional nuances in phenotype that appeared dependent on CD8 depletion: In rhesus macaques, CD95  
164 (Fas) was increased on classical monocytes in CD8-depleted animals (Supplementary Fig. 4e) and on  
165 nonclassical monocytes in nondepleted animals (Supplementary Fig. 4f).  
166 CD8 depletion also differentially modulated the abundance of monocyte subsets in blood. One day  
167 following ZIKV infection, classical monocytes expanded immediately in nondepleted animals of both  
168 cohorts (Fig. 3e). During acute infection (3-7 dpi), the frequency of nonclassical monocytes increased  
169 preferentially in CD8-depleted rhesus macaques and in nondepleted cynomolgus macaques (Fig. 3f).  
170 Nondepleted rhesus macaques showed an expansion of intermediate monocyte frequency at 3-7 dpi (Fig.  
171 3g), although a CD8-dependent effect on intermediate monocyte frequency was not evident in  
172 cynomolgus monkeys.

### 173 **Compensatory adaptive immune responses**

174 Adaptive immune responses to ZIKV were also differentially modulated by CD8 depletion, with apparent  
175 compensatory responses in CD8-depleted macaques of both cohorts. Nondepleted rhesus and cynomolgus  
176 macaques consistently induced CD8 T cell responses 7-10 dpi, which were characterized by proliferation



177 (Ki67) and activation (CD69) of effector memory (EM), central memory (CM), and naïve CD8 T cell  
178 subsets (Figs. 4a-c & Supplementary Figs 5a-e). These responses were antigen-specific and functional,  
179 given that CD8 T cells stimulated with ZIKV peptides produced IFN $\gamma$  and contained perforin by  
180 intracellular cytokine staining (ICS) (Fig. 4e). Intriguingly, the CD8-depleted rhesus macaque R64357  
181 also showed evidence of a CD8 T cell response at 21 dpi (Figs. 4c & 4e), concomitant with the recovery  
182 of CD8+ lymphocytes in this animal (Supplementary Fig. 1a).

183 The absence of CD8 T cells in depleted rhesus and cynomolgus macaques appeared to promote the  
184 reciprocal activation and expansion of CD4 T cell subsets (Figs. 4a-b, 4d and Supplementary Figs. 5f-j),  
185 mirroring the kinetics of CD8 T cell activation in nondepleted animals. CD4 T cell responses were Th1 in  
186 functionality, characterized by co-positivity for IL-2 and IFN $\gamma$ , and were also antigen-specific for E and  
187 NS1 peptides in both CD8-depleted rhesus macaques (Fig. 4f).

188 To gauge humoral responses to ZIKV, we conducted a plaque reduction neutralization test (PRNT) using  
189 rhesus macaque sera to quantify neutralizing antibody titers. All animals except R20865 showed evidence  
190 of neutralizing antibodies at 7 dpi, the earliest post-infection timepoint tested (Fig. 4g). While highly  
191 neutralizing titers were present in all animals at 15 dpi, antibody concentrations declined in nondepleted  
192 animals, but not in CD8-depleted animals, beyond this timepoint. Strikingly, depleted rhesus macaques  
193 retained highly neutralizing antibody titers until necropsy, a finding consistent with elevated B cell  
194 proliferation (Fig. 4h) and activation (Fig. 4i) in these animals.

## 195 **Enhanced tissue dissemination and neuropathology**

196 Given the persistence of high neutralizing antibody titers in CD8-depleted rhesus macaques, we suspected  
197 that virus might be lingering in the peripheral tissues of these animals. The duration of infection before  
198 necropsy differed among the rhesus (30 dpi) and cynomolgus (14 dpi) macaque cohorts to identify  
199 patterns of viral dissemination and clearance over time. Informed by previous reports of ZIKV tropism in

200 macaques<sup>10,15,24</sup>, we searched for viral RNA in lymphoid, neural, gastrointestinal (GI), and reproductive  
201 tissues, as well as in semen and cerebrospinal fluid (CSF) to evaluate viral distribution in these sites.

202 Relative to nondepleted animals, CD8-depleted cynomolgus macaques had markedly higher levels of  
203 ZIKV RNA in the inguinal, mesenteric, and colonic lymph nodes, as well as in the spleen and jejunum  
204 (Figs. 5a and 5c). All cynomolgus monkeys except C91638 harbored virus in the rectum without an  
205 obvious difference among treatment groups. Notably, the trend of higher viral burdens in the lymphatic  
206 tissues of CD8-depleted animals was consistent in rhesus macaques (Fig. 5f). CD8 depletion also  
207 appeared to promote ZIKV dissemination in the semen, with both CD8-depleted cynomolgus macaques  
208 presenting semen viral loads and no viral RNA detected in nondepleted animals of the same cohort (Fig.  
209 5d). Intriguingly, the nondepleted macaque C84545 showed the highest level of viral RNA in the prostate  
210 and was the only animal to present virus in the testes (Fig. 5c), yet no ZIKV was detected in the semen of  
211 this animal (Fig. 5d). These findings too were consistent in rhesus macaques, with virus detected in the  
212 semen (Fig. 5g) and seminal vesicle (Fig. 5f) of a CD8-depleted animal and only a miniscule quantity of  
213 viral RNA detected in the semen of a nondepleted animal (Fig. 5g).

214 ZIKV RNA was detected in the brainstem and subcortical white matter of C84545 (Fig. 5b), and this  
215 animal also presented a high magnitude viral load in the CSF early in infection, which persisted until  
216 necropsy (Fig. 5e). Exclusive of C84545, CD8-depleted cynomolgus and rhesus macaques manifested  
217 CSF viral loads at least an order of magnitude greater than nondepleted animals (Figs. 5e and 5h).

218 Although ZIKV was not detected in the CNS of any rhesus macaque, R25671 and R64357 manifested  
219 neural lesions at necropsy that were not present in nondepleted animals. Most strikingly, the brainstem of  
220 R25671 showed an area of severe multifocal to coalescing encephalomalacia which showed evidence of  
221 Wallerian degeneration, characterized by vacuolation, swollen axons, and infiltration by lymphocytes and  
222 phagocytic gitter cells (Fig. 5i). Gitter cells are occasionally found within dilated myelin sheaths. Scant  
223 brown granular pigment (presumed hemosiderin) and a proliferative cerebral vessel adjacent to the  
224 malacia may indicate that the malacia is the result of a vascular event (thromboembolism, infarct,

225 ischemia, etc.). Additionally, lymphocytic infiltrate was present in the meninges surrounding the lumbar  
226 spinal cord (Fig. 5i). No gross abnormalities were noted in R64357, although the sciatic nerve exhibited  
227 mild lymphocytic perivasculitis. The sciatic nerve is a known site of ZIKV replication in mice depleted of  
228 CD8 cells<sup>4</sup>. Further, the brainstem contained a localized area of gliosis, an indicator of CNS damage<sup>25</sup>,  
229 and dilated myelin sheaths (Fig. 5j). A cause for these neural inflammatory lesions was not apparent by  
230 histology.

## 231 Discussion

232 Owing to the importance of CD8<sup>+</sup> T cells in the control of ZIKV in mice<sup>4,5</sup>, our aim was to explore  
233 whether these findings are consistent in nonhuman primates. The absence of CD8<sup>+</sup> lymphocytes  
234 prompted immediately observable host responses that diverged from previously consistent patterns of  
235 viremia and immunity. The delay of serum viremia in CD8-depleted macaques stood in patent contrast to  
236 patterns of acute ZIKV infection observed by our own group (Supplementary Fig. 2a) and others<sup>8</sup>.  
237 Although a mechanism underlying the delayed serum viremia remains obscure, it is possible that a lack of  
238 NK cell stimulation in CD8-depleted animals may be misfiring viral replication in what would otherwise  
239 be readily permissive monocytes. Indeed, monocytes engage in intercellular crosstalk with NK cells<sup>26,27</sup>,  
240 and IFN $\gamma$  is shown to support ZIKV replication<sup>28</sup>. NK cell-derived IFN $\gamma$  may activate ZIKV infected  
241 myeloid cells in nondepleted animals, promoting an inflammatory milieu that favors early viral  
242 replication. Alternatively, NK cells are shown to be minor reservoirs of ZIKV RNA in infected humans<sup>19</sup>  
243 and pigtail macaques<sup>20</sup>, so the absence of this potential target cell may contribute to the delayed serum  
244 viremia in CD8-depleted animals.

245 CD8 depletion also impacted the mobilization of leukocyte populations acutely following infection,  
246 contrasting patterns reliably observed by our own group (Figs S2c-e) and others<sup>15</sup>. Macaques depleted of  
247 CD8 T cells and NK cells show little fluctuation in the biomarker of inflammation NLR, indicating  
248 altered innate immune responses immediately following infection. In line with these observations, mice

249 lacking NK cells exhibit altered neutrophil recruitment in a variety of infectious and noninfectious  
250 conditions <sup>29</sup>. Neutrophil effector functions are modulated by NK cell-derived cytokines <sup>29</sup>, a signaling  
251 axis which might have been disrupted by the depletion of NK cells in macaques.

252 Confirming miscommunication within the innate immune system of CD8-depleted macaques, these  
253 animals presented largely muted transcriptional activity in key virus response pathways during acute  
254 infection. In nondepleted macaques, antiviral gene expression was driven principally by circulating  
255 monocytes, which stood in sharp contrast to the transcriptional void evident in CD8-depleted animals.

256 Intercellular crosstalk between monocytes and NK cells affects transcriptional responses to ZIKV  
257 infection <sup>22</sup>, so the absence of NK cells in CD8-depleted macaques might have permitted the infection to  
258 evade transcriptional induction in monocytes, complementing the delayed viremia in these animals.

259 Consistent with a model of monocyte-dependent outcomes in acute ZIKV infection, CD8-depleted and  
260 nondepleted macaques also differed in the magnitude and phenotype of their monocyte responses during  
261 acute infection. Intermediate and nonclassical monocytes showed the greatest degree of activation,  
262 agreeing with recent findings that these subsets are primary targets of ZIKV in the blood <sup>19,30,31</sup>. CD8  
263 depletion also impacted the activation of monocytes temporally, further underscoring dysregulated innate  
264 responses in depleted animals. CD169 (siglec-1) is a sialic acid-binding lectin previously found to be  
265 upregulated in acute ZIKV infection in rhesus macaques <sup>24,32</sup>. CD169 has important roles in virus capture  
266 by myeloid cells <sup>33</sup> and in the mounting of CD8 T cell responses in viral infection <sup>34</sup>, so the robust  
267 induction of CD169 in nondepleted animals might have promoted sufficient CD8 T cell responses. CD8  
268 depletion also affected monocyte frequency, possibly contributing to differential transcriptional  
269 responses. The transient increase in classical monocytes of both cohorts may be analogous to the  
270 monocytosis that accompanies acute ZIKV replication in human patients <sup>19</sup>. The increase in CD16+  
271 nonclassical monocytes in CD8-depleted rhesus macaques is an outcome also observed in ZIKV infection  
272 of human blood <sup>30</sup>, and the expansion of intermediate monocytes in nondepleted animals resembles ZIKV

273 infection in Nicaraguan patients<sup>19</sup>. Our data support a CD8+ lymphocyte-dependent effect in these  
274 transitions, possibly accounting for divergent transcriptional responses in blood.

275 In addition to modulating innate immune responses, the depletion of CD8+ lymphocytes also promoted  
276 compensatory adaptive responses to ZIKV in both cohorts. Nondepleted animals and even the CD8-  
277 recovering rhesus macaque R64357 mounted robust CD8 T cell responses, affirming the importance of  
278 CD8+ lymphocytes in acute infection. There is precedence for CD8 T cell responses to ZIKV in mice<sup>4,5,35</sup>  
279 and humans<sup>36,37</sup>, which appears to be consistent in nonhuman primates. Meanwhile, the presence of Th1  
280 responses and prolonged humoral responses in CD8-depleted animals possibly compensate for the  
281 absence of CD8 surveillance. Such adaptive responses are reported in mice, as Th1 polarization<sup>35</sup>, and  
282 CD4-driven humoral responses<sup>38</sup> are important for controlling infection. Our data support the importance  
283 of these adaptive responses in nonhuman primates, especially when the CD8 arm of adaptive immunity is  
284 compromised.

285 The persistence of high neutralizing antibody titers until necropsy in CD8-depleted rhesus macaques also  
286 suggested that there might be virus lingering in the peripheral tissues of these animals. Indeed, ZIKV  
287 RNA was generally more abundant in the lymphatic tissues, semen and CSF of CD8-depleted rhesus and  
288 cynomolgus macaques relative to nondepleted animals, implying the importance of CD8+ lymphocytes in  
289 limiting ZIKV dissemination and/or persistence in tissues. Tissue viral loads were also consistently higher  
290 in cynomolgus compared to rhesus macaques, possibly reflecting the abbreviated time of infection before  
291 necropsy. In rhesus monkeys, it is possible that the absence of viral RNA in neural and reproductive  
292 tissues might have been transient due to viral clearance given the 30-day infection period of these  
293 animals. Previous reports in rhesus<sup>39</sup> and pigtail<sup>20</sup> monkeys have also shown that ZIKV persists in  
294 lymphatic tissues well beyond the clearance of virus from the serum. Although it remains unclear whether  
295 the ZIKV present in lymph nodes is replication competent, our data are nonetheless consistent with a  
296 model where the absence of CD8+ lymphocytes permits the dispersal of ZIKV.

297 CD8-depleted rhesus macaques also presented gross neural lesions at necropsy not seen in nondepleted  
298 animals. The most severe lesion occurred in the brainstem of a depleted animal that never recovered  
299 CD8<sup>+</sup> lymphocytes, and similar manifestations of encephalomalacia and axon degeneration have been  
300 reported in ZIKV infection of human fetal brain tissue<sup>40-42</sup>. Perhaps complementarily, neural lesions in  
301 the CD8-recovering rhesus macaque were less severe. Although it is tempting to speculate that the  
302 absence of CD8<sup>+</sup> lymphocytes in R25671 and R64357 allowed neural dissemination of the virus and  
303 thereby promoted neuropathy, our inability to detect ZIKV RNA in brain sections from these animals  
304 precludes this conclusion. Because ZIKV was cleared from the CSF of rhesus monkeys within 15 dpi, it is  
305 possible that virus could have also cleared from the CNS by necropsy and that these lesions were virus  
306 associated even if viral RNA was not detectable late in infection. Supporting this argument, CSF viral  
307 loads appear to be associated with ZIKV dissemination in neural tissue, given that C84545 showed the  
308 highest and most persistent CSF viremia and was also the only animal with ZIKV RNA identified in the  
309 brain. The absence of immune surveillance and IFN signaling in depleted animals might have permitted  
310 initial ZIKV infection of neural tissues, but infection could have been transient due to the eventual  
311 priming of compensatory adaptive responses. Additionally, ZIKV localizes as discrete foci in macaque  
312 tissues<sup>32</sup>, complicating the detection of sparse viral lesions within organs. It is worth noting that CNS  
313 localization of ZIKV has been observed as early as 5 dpi in acutely infected macaques<sup>15</sup>, and a separate  
314 study in rhesus monkeys failed to identify ZIKV RNA in the CNS at 14 dpi, despite diffuse patterns of  
315 viral dissemination<sup>10</sup>. These findings, together with our own, establish precedence for early CNS  
316 dissemination of ZIKV in nonhuman primates, which may be cleared later in infection.

317 In summary, the present study illustrates a pliable dynamic between ZIKV and its hosts. CD8 depletion  
318 appears to alter patterns of innate immune activation and regulation, possibly disrupting patterns of  
319 antiviral signaling. CD8 T cells may provide default adaptive immune responses to ZIKV, and their  
320 absence may induce compensatory CD4 and humoral responses. Finally, CD8<sup>+</sup> lymphocytes appear to

321 constitute frontline defenses to ZIKV, potentially limiting viral dissemination to lymphoid tissues,  
322 reproductive organs, and the CNS.

## 323 **Methods**

### 324 **Animal experiments**

325 The four adult male Indian origin rhesus macaques (*Macaca mulatta*) and five adult male cynomolgus  
326 macaques (*Macaca fascicularis*) utilized in this study were housed at the Tulane National Primate  
327 Research Center (TNPRC). The TNPRC is fully accredited by AAALAC International (Association for  
328 the Assessment and Accreditation of Laboratory Animal Care), Animal Welfare Assurance No. A3180-  
329 01. Animals were cared for in accordance with the NRC Guide for the Care and Use of Laboratory  
330 Animals and the Animal Welfare Act. Animal experiments were approved by the Institutional Animal  
331 Care and Use Committee of Tulane University (protocol P0367).

332 Two rhesus macaques (R25671 and R64357) and two cynomolgus macaques (C78777 and C18942) were  
333 depleted of CD8<sup>+</sup> lymphocytes by administration of the anti-CD8 $\alpha$  antibody MT807R1 (NHP Reagent  
334 Resource; <https://www.nhpreagents.org>)<sup>14</sup>. The initial subcutaneous administration of 10 mg/kg at 14  
335 days pre-infection was followed by three intravenous administrations of 5 mg/kg at 11, 7, and 5 days pre-  
336 infection, as per the distributor's protocol. C84545 was treated with the irrelevant control antibody anti-  
337 desmipramine (NHP Reagent Resource; <https://www.nhpreagents.org>) at the same dosages and time  
338 intervals pre-infection. All animals were subcutaneously infected with 10<sup>4</sup> PFU of a Brazilian ZIKV  
339 isolate<sup>43</sup> at 0 dpi (Fig. 1a). For data comparison, we included viral loads and complete blood count (CBC)  
340 data from a previous cohort of 4 non-pregnant female rhesus macaques (R32835, R24547, R25508,  
341 R22624) that were similarly infected with the same dose of the same Brazilian ZIKV isolate that was used  
342 in this study (Supplementary Figs. 2a-e).

343 Whole blood, CSF, and semen were obtained from animals at the indicated timepoints (Fig. 1a). PBMCs  
344 were isolated from the blood of rhesus macaques using SepMate tubes (Stemcell Technologies) according  
345 to the manufacturer's protocol or from the blood of cynomolgus macaques using Lymphoprep (Stemcell  
346 Technologies) for standard density gradient centrifugation. At necropsy, the indicated tissues were  
347 collected and snap-frozen.

## 348 **Virus quantification**

349 Viral RNA was extracted from serum and CSF using the High Pure Viral RNA Kit (Roche). Semen, as  
350 well as the indicated lymphoid, reproductive, GI, and neural tissues were homogenized in Qiazol  
351 (Qiagen) using either disposable tissue grinders (Fisherbrand) or a TissueRuptor (Qiagen), and RNA was  
352 isolated using the RNeasy Lipid Tissue Mini Kit (Qiagen). Viral RNA from body fluids and tissues was  
353 quantified using qRT-PCR as described previously <sup>44</sup>.

## 354 **Antiviral gene expression assays**

355 2.5 ml whole blood was drawn from each animal at 0, 1, 3, and 15 dpi into PAXgene blood RNA tubes  
356 (PreAnalytiX) and equilibrated to -80°C as per the manufacturer's protocol. RNA was extracted from  
357 blood samples using the PAXgene blood RNA kit (PreAnalytiX), and cDNA was synthesized using the  
358 RT2 First Strand Kit (Qiagen). Transcriptional profiles of immune signaling were generated using the  
359 nCounter NHP Immunology Panel of 770 macaque immune response genes (NanoString Technologies).  
360 In whole blood, transcriptional responses were assessed at 3 dpi relative to expression levels pre-infection  
361 using nSolver software v4.0 (NanoString Technologies). Fold change data were imported into Ingenuity  
362 Pathway Analysis (IPA) (Qiagen) to discern relevant signaling pathways and disease functions. Antiviral  
363 transcriptional responses were confirmed by way of qRT-PCR using a rhesus macaque RT2 Profiler PCR  
364 Array (Qiagen). Responses within each species and treatment group were analyzed together to identify  
365 expression levels at the indicated timepoints relative to pre-infection. Heatmaps of gene expression and



366 disease-related pathways were generated using Morpheus (<https://software.broadinstitute.org/Morpheus>).

367 PCA of antiviral gene expression was performed using ClustVis <sup>45</sup>.

368 To identify cell populations contributing to antiviral signaling in blood, the CD14 and CD8 MicroBead  
369 kits (Miltenyi Biotec) were used to sort CD14<sup>+</sup> monocytes and CD8<sup>+</sup> lymphocytes from the PBMCs of  
370 the indicated animals at peak transcriptional activity (3 dpi). RNA was isolated from cell fractions using  
371 the RNeasy Mini Kit (Qiagen), and cDNA was synthesized using the RT2 First Strand Kit (Qiagen).

372 Transcriptional profiling was performed using the nCounter NHP Immunology Panel (NanoString) and  
373 verified by RT2 qPCR Primer Assays (Qiagen) for ISG15, OAS2, and DDX58.

374 To characterize antiviral signaling in myeloid cells, PBMCs were isolated from the whole blood of 4  
375 ZIKV-naïve colony rhesus macaques as described above, and the CD14 MicroBead kit (Miltenyi Biotec)  
376 was used to isolate monocytes. Monocytes were cultured at  $1 \times 10^6$  cells/ml in RPMI-1640 medium  
377 supplemented with 1% human AB serum (Sigma), 20 ng/ml M-CSF (PeproTech), 1% L-glutamine, and  
378 1% penicillin/streptomycin. After 7 days of culture, monocytes were sufficiently differentiated into  
379 macrophages and were either infected with the same Brazilian ZIKV isolate described above or left  
380 uninfected. At 24 hpi, RNA was extracted using the RNeasy Mini Kit (Qiagen), cDNA was synthesized  
381 using the RT2 First Strand Kit (Qiagen), and transcriptional signaling was assessed using the rhesus  
382 macaque antiviral response RT2 Profiler PCR Array (Qiagen). Antiviral gene expression in ZIKV-  
383 infected MDMs was calculated relative to uninfected controls.

## 384 **Flow cytometry and gating strategy**

385 For absolute lymphocyte counts, whole blood was stained within 2 hours of blood draw for the surface  
386 markers CD45 (PerCP; DO58-1283; BD Biosciences), CD3 (FITC; SP34; BD Biosciences), CD4 (APC;  
387 L200; BD Biosciences), and CD8 (V500; SK1; BD Biosciences). Flow cytometry was performed on a BD  
388 FACSVerse instrument, and absolute counts were calculated using FACS Suite software.

389 For immunophenotyping, PBMCs from the indicated timepoints were thawed, washed, and stained using  
390 Live/Dead Fixable Aqua Dead Cell Stain Kit (Invitrogen). PBMCs were then stained for the surface  
391 markers CD16 (AL488; 3G8; BioLegend), CD169 (PE; 7-239; BioLegend), CD28 (PECF594; CD28.2;  
392 BD Biosciences), CD95 (PCP-Cy5.5; DX2; BioLegend), CD3 (PE-Cy7; SP34-2; BD Biosciences), CD8  
393 (PacBlue; SK1; BioLegend), CD14 (BV605; M5E2; BD Biosciences), HLA-DR (BV650; L243;  
394 BioLegend), NKG2A (APC; Z199; Beckman Coulter), and CD4 (APC-H7; L200; BD Biosciences). Cells  
395 were subsequently fixed in FluoroFix buffer (BioLegend), permeabilized using Perm/Wash buffer  
396 (BioLegend), and stained intracellularly for CD69 (BV711; FN50; BD Biosciences) and Ki67 (AL700;  
397 B56; BD Biosciences). Flow cytometry was performed on a BD LSRII instrument and data were analyzed  
398 using FlowJo (vX.10.4.2) and viSNE (Cytobank) softwares. For viSNE analysis, live singlet monocytes  
399 (CD14+ and/or CD16+) or live singlet CD3+ T cells were gated prior to downsampling at a minimum of  
400 500 cells per animal in FlowJo v. 10.5.3. Downsampled files for each animal were then concatenated by  
401 group (i.e., species, dpi, and treatment condition). When the number of animals differed per group,  
402 concatenated files were further downsampled to achieve an equal number of cells per group. viSNE was  
403 conducted using Cytobank with the following settings: Perplexity = 30, Iterations = 1000, Theta = 0.5,  
404 Seed = random, Compensation = internal file. For the monocyte viSNE, the following parameters were  
405 utilized in the run: Ki67, CD14, HLA-DR, CD69, CD95, CD14, and CD169. For the CD3+ T cells  
406 viSNE, the following parameters were utilized in the run: Ki67, CD4, HLA-DR, CD69, CD95, CD28,  
407 CD3, CD8.

408 For general immunophenotyping analysis, cytometry data were first gated for lymphocytes, singlets, and  
409 live cells. NK cells were considered as CD8+/CD16+. CD4 T cells (CD3+/CD4+) and CD8 T cells  
410 (CD3+/CD8+) were gated into naïve (CD28+/CD95-), central memory (CD28+/CD95+), and effector  
411 memory (CD28-/CD95+) subsets. CD3- cells were divided into B cells (DR+/CD14-/CD16-) and  
412 monocytes (classical, CD14++/CD16-; intermediate, CD14+/CD16+; nonclassical, CD14<sup>low</sup>/CD16+). Cell

413 subsets were analyzed with respect to frequency, proliferation (Ki67+) and activation (CD69+ or  
414 CD169+).

### 415 **Intracellular cytokine staining**

416 PBMCs from the indicated timepoints were thawed and rested overnight prior to stimulation with peptide  
417 pools comprising ZIKV C, M, E, and NS1 (BEI Resources). On peptide stimulation, cells were also  
418 treated with brefeldin A (BioLegend), GolgiStop (BD Biosciences), anti-CD28 (NHP Reagent Reference  
419 Program, [www.nhpreagents.org/](http://www.nhpreagents.org/)), anti-CD49d (9F10; BioLegend), and anti-CD107a (AL700; H4A3; BD  
420 Biosciences). 24 hours post-stimulation, cells were stained for the surface markers CD3 (PE-Cy7; SP34-  
421 2; BD Biosciences), CD8 (PacBlue; SK1; BioLegend), and CD4 (APC-H7; L200; BD Biosciences). Cells  
422 were also fixed and permeabilized as described above and stained intracellularly for perforin (FITC; Pf-  
423 344; Mabtech), granzyme B (PE; GB12; Invitrogen), CD69 (PE-CF594; FN50; BD Biosciences), IL-2  
424 (PCP-Cy5.5; MQ1-17H12; BD Biosciences), and IFN $\gamma$  (AL647; 4S.B3; BioLegend). Flow cytometry was  
425 performed on a BD LSRII instrument and data were analyzed using FlowJo software (vX.10.4.2).

### 426 **Plaque reduction neutralization tests**

427 ZIKV PRNTs were conducted according to previously published protocols<sup>46,47</sup>. Briefly, ZIKV MEX-I-44  
428 isolated in Tapachula, Mexico in 2016 was obtained from The University of Texas Medical Branch,  
429 Galveston, TX and cultured to passage 8 in Vero cells. Serum specimens were incubated for one hour at  
430 serial dilutions of 1:10, 1:20...1:320 with a previously frozen virus stock of known plaque forming unit  
431 (PFU). Samples were then inoculated in duplicate onto a mono-layer of Vero cells grown on 6-well plates  
432 and allowed to incubate for an additional hour. Infectious material was then removed and replaced with a  
433 1:1 mixture of Vero media and Avicel® before being incubated for 4 days. To read plaques, the Avicel®  
434 layer was fixed with 10% neutral buffered formalin. Finally, the formalin-Avicel® layer was removed  
435 and the monolayer was stained with crystal violet, washed with tap water and allowed to dry before  
436 plaques were counted manually.

437 Percent reduction in observed plaques and a PRNT90 cutoff were used for interpretation. A PRNT90 titer  
438 is the dilution of a sample at which a 90% reduction in possible plaques is observed. The maximum  
439 number of potential plaques was obtained for each run using a corresponding back-titration and a linear  
440 model was fit to the observed number of plaques for each dilution. A PRNT90 titer was derived for each  
441 sample using the linear model and the equation for a straight line in the statistical program R<sup>48</sup>. For  
442 samples that were positive but above the resolution of the PRNT assay the value of the greatest number of  
443 possible plaques for that run, as determined by the back titration, was assigned for each dilution for use  
444 with the linear model.

## 445 **Histology**

446 Tissues samples collected at necropsy were fixed in Z-Fix (Anatech), embedded in paraffin and 5  $\mu$  m  
447 thick sections were cut, adhered to charged glass slides, and either stained routinely with hematoxylin and  
448 eosin or Prussian blue.

## 449 **Statistical analysis**

450 For NLR comparison, the Mann-Whitney test was performed using GraphPad Prism v6.07 (GraphPad  
451 Software).

## 452 **References**

- 453 1 Dick, G. W., Kitchen, S. F. & Haddock, A. J. Zika virus. I. Isolations and serological specificity. *Trans*  
454 *R Soc Trop Med Hyg* **46**, 509-520 (1952).
- 455 2 Plourde, A. R. & Bloch, E. M. A Literature Review of Zika Virus. *Emerg Infect Dis* **22**, 1185-1192,  
456 doi:10.3201/eid2207.151990 (2016).
- 457 3 Slon Campos, J. L., Mongkolsapaya, J. & Screaton, G. R. The immune response against  
458 flaviviruses. *Nat Immunol* **19**, 1189-1198, doi:10.1038/s41590-018-0210-3 (2018).

- 459 4 Elong Ngono, A. *et al.* Mapping and Role of the CD8(+) T Cell Response During Primary Zika Virus  
460 Infection in Mice. *Cell Host Microbe* **21**, 35-46, doi:10.1016/j.chom.2016.12.010 (2017).
- 461 5 Huang, H. *et al.* CD8+ T Cell Immune Response in Immunocompetent Mice during Zika Virus  
462 Infection. *J Virol* **91**, doi:10.1128/jvi.00900-17 (2017).
- 463 6 Grant, A. *et al.* Zika Virus Targets Human STAT2 to Inhibit Type I Interferon Signaling. *Cell host &*  
464 *microbe* **19**, 882-890, doi:10.1016/j.chom.2016.05.009 (2016).
- 465 7 Jurado, K. A. *et al.* Antiviral CD8 T cells induce Zika-virus-associated paralysis in mice. *Nat*  
466 *Microbiol* **3**, 141-147, doi:10.1038/s41564-017-0060-z (2018).
- 467 8 Dudley, D. M. *et al.* A rhesus macaque model of Asian-lineage Zika virus infection. *Nat Commun*  
468 **7**, 12204, doi:10.1038/ncomms12204 (2016).
- 469 9 Dudley, D. M. *et al.* Miscarriage and stillbirth following maternal Zika virus infection in  
470 nonhuman primates. *Nature medicine* **24**, 1104-1107, doi:10.1038/s41591-018-0088-5 (2018).
- 471 10 Coffey, L. L. *et al.* Zika Virus Tissue and Blood Compartmentalization in Acute Infection of Rhesus  
472 Macaques. *PLoS One* **12**, e0171148, doi:10.1371/journal.pone.0171148 (2017).
- 473 11 Magnani, D. M. *et al.* Fetal demise and failed antibody therapy during Zika virus infection of  
474 pregnant macaques. *Nature communications* **9**, 1624, doi:10.1038/s41467-018-04056-4 (2018).
- 475 12 Osuna, C. E. *et al.* Zika viral dynamics and shedding in rhesus and cynomolgus macaques. *Nature*  
476 *medicine* **22**, 1448-1455, doi:10.1038/nm.4206 (2016).
- 477 13 Koide, F. *et al.* Development of a Zika Virus Infection Model in Cynomolgus Macaques. *Front*  
478 *Microbiol* **7**, 2028, doi:10.3389/fmicb.2016.02028 (2016).
- 479 14 Schmitz, J. E. *et al.* A nonhuman primate model for the selective elimination of CD8+  
480 lymphocytes using a mouse-human chimeric monoclonal antibody. *Am J Pathol* **154**, 1923-1932,  
481 doi:10.1016/S0002-9440(10)65450-8 (1999).

- 482 15 Osuna, C. E. *et al.* Zika viral dynamics and shedding in rhesus and cynomolgus macaques. *Nat*  
483 *Med* **22**, 1448-1455, doi:10.1038/nm.4206 (2016).
- 484 16 Prestwood, T. R. *et al.* Trafficking and replication patterns reveal splenic macrophages as major  
485 targets of dengue virus in mice. *J Virol* **86**, 12138-12147, doi:10.1128/JVI.00375-12 (2012).
- 486 17 Bryan, M. A. *et al.* Splenic macrophages are required for protective innate immunity against  
487 West Nile virus. *PLoS One* **13**, e0191690, doi:10.1371/journal.pone.0191690 (2018).
- 488 18 Swirski, F. K. *et al.* Identification of splenic reservoir monocytes and their deployment to  
489 inflammatory sites. *Science* **325**, 612-616, doi:10.1126/science.1175202 (2009).
- 490 19 Michlmayr, D., Andrade, P., Gonzalez, K., Balmaseda, A. & Harris, E. CD14+CD16+ monocytes are  
491 the main target of Zika virus infection in peripheral blood mononuclear cells in a paediatric study  
492 in Nicaragua. *Nat Microbiol* **2**, 1462-1470, doi:10.1038/s41564-017-0035-0 (2017).
- 493 20 O'Connor, M. A. *et al.* Early cellular innate immune responses drive Zika viral persistence and  
494 tissue tropism in pigtail macaques. *Nat Commun* **9**, 3371, doi:10.1038/s41467-018-05826-w  
495 (2018).
- 496 21 Faria, S. S. *et al.* The neutrophil-to-lymphocyte ratio: a narrative review. *Ecancermedicalscience*  
497 **10**, 702, doi:10.3332/ecancer.2016.702 (2016).
- 498 22 Lum, F. M. *et al.* Zika Virus Infection Preferentially Counterbalances Human Peripheral  
499 Monocyte and/or NK Cell Activity. *mSphere* **3**, doi:10.1128/mSphereDirect.00120-18 (2018).
- 500 23 Amir, e.-A. *et al.* viSNE enables visualization of high dimensional single-cell data and reveals  
501 phenotypic heterogeneity of leukemia. *Nat Biotechnol* **31**, 545-552, doi:10.1038/nbt.2594  
502 (2013).
- 503 24 Hirsch, A. J. *et al.* Zika Virus infection of rhesus macaques leads to viral persistence in multiple  
504 tissues. *PLoS pathogens* **13**, e1006219, doi:10.1371/journal.ppat.1006219 (2017).

- 505 25 Garman, R. H. Histology of the central nervous system. *Toxicol Pathol* **39**, 22-35,  
506 doi:10.1177/0192623310389621 (2011).
- 507 26 Michel, T., Hentges, F. & Zimmer, J. Consequences of the crosstalk between  
508 monocytes/macrophages and natural killer cells. *Front Immunol* **3**, 403,  
509 doi:10.3389/fimmu.2012.00403 (2012).
- 510 27 Dalbeth, N. *et al.* CD56bright NK cells are enriched at inflammatory sites and can engage with  
511 monocytes in a reciprocal program of activation. *J Immunol* **173**, 6418-6426 (2004).
- 512 28 Chaudhary, V. *et al.* Selective Activation of Type II Interferon Signaling by Zika Virus NS5 Protein.  
513 *J Virol* **91**, doi:10.1128/JVI.00163-17 (2017).
- 514 29 Costantini, C. & Cassatella, M. A. The defensive alliance between neutrophils and NK cells as a  
515 novel arm of innate immunity. *J Leukoc Biol* **89**, 221-233, doi:10.1189/jlb.0510250 (2011).
- 516 30 Foo, S. S. *et al.* Asian Zika virus strains target CD14+ blood monocytes and induce M2-skewed  
517 immunosuppression during pregnancy. *Nat Microbiol* **2**, 1558-1570, doi:10.1038/s41564-017-  
518 0016-3 (2017).
- 519 31 Jurado, K. A. & Iwasaki, A. Zika virus targets blood monocytes. *Nat Microbiol* **2**, 1460-1461,  
520 doi:10.1038/s41564-017-0049-7 (2017).
- 521 32 Hirsch, A. J. *et al.* Zika virus infection in pregnant rhesus macaques causes placental dysfunction  
522 and immunopathology. *Nat Commun* **9**, 263, doi:10.1038/s41467-017-02499-9 (2018).
- 523 33 Sewald, X. *et al.* Retroviruses use CD169-mediated trans-infection of permissive lymphocytes to  
524 establish infection. *Science* **350**, 563-567, doi:10.1126/science.aab2749 (2015).
- 525 34 van Dinther, D. *et al.* Functional CD169 on Macrophages Mediates Interaction with Dendritic  
526 Cells for CD8. *Cell Rep* **22**, 1484-1495, doi:10.1016/j.celrep.2018.01.021 (2018).

- 527 35 Pardy, R. D. *et al.* Analysis of the T Cell Response to Zika Virus and Identification of a Novel CD8+  
528 T Cell Epitope in Immunocompetent Mice. *PLoS Pathog* **13**, e1006184,  
529 doi:10.1371/journal.ppat.1006184 (2017).
- 530 36 Grifoni, A. *et al.* Prior Dengue virus exposure shapes T cell immunity to Zika virus in humans. *J*  
531 *Virology*, doi:10.1128/JVI.01469-17 (2017).
- 532 37 Grifoni, A. *et al.* Cutting Edge: Transcriptional Profiling Reveals Multifunctional and Cytotoxic  
533 Antiviral Responses of Zika Virus-Specific CD8. *J Immunol* **201**, 3487-3491,  
534 doi:10.4049/jimmunol.1801090 (2018).
- 535 38 Lucas, C. G. O. *et al.* Critical role of CD4+ T cells and IFN $\gamma$  signaling in antibody-mediated  
536 resistance to Zika virus infection. *Nat Commun* **9**, doi:10.1038/s41467-018-05519-4 (2018).
- 537 39 Aid, M. *et al.* Zika Virus Persistence in the Central Nervous System and Lymph Nodes of Rhesus  
538 Monkeys. *Cell* **169**, 610-620.e614, doi:10.1016/j.cell.2017.04.008 (2017).
- 539 40 Vesnaver, T. V. *et al.* Zika virus associated microcephaly/micrencephaly-fetal brain imaging in  
540 comparison with neuropathology. *BJOG* **124**, 521-525, doi:10.1111/1471-0528.14423 (2017).
- 541 41 Driggers, R. W. *et al.* Zika Virus Infection with Prolonged Maternal Viremia and Fetal Brain  
542 Abnormalities. *N Engl J Med* **374**, 2142-2151, doi:10.1056/NEJMoa1601824 (2016).
- 543 42 Petribu, N. C. L. *et al.* Common findings on head computed tomography in neonates with  
544 confirmed congenital Zika syndrome. *Radiol Bras* **51**, 366-371, doi:10.1590/0100-  
545 3984.2017.0119 (2018).
- 546 43 Bonaldo, M. C. *et al.* Isolation of Infective Zika Virus from Urine and Saliva of Patients in Brazil.  
547 *PLoS Negl Trop Dis* **10**, e0004816, doi:10.1371/journal.pntd.0004816 (2016).
- 548 44 Magnani, D. M. *et al.* Fetal demise and failed antibody therapy during Zika virus infection of  
549 pregnant macaques. *Nat Commun* **9**, 1624, doi:10.1038/s41467-018-04056-4 (2018).



- 550 45 Metsalu, T. & Vilo, J. ClustVis: a web tool for visualizing clustering of multivariate data using  
551 Principal Component Analysis and heatmap. *Nucleic Acids Res* **43**, W566-570,  
552 doi:10.1093/nar/gkv468 (2015).
- 553 46 Lieberman, M. M. *et al.* Immunogenicity and protective efficacy of a recombinant subunit West  
554 Nile virus vaccine in rhesus monkeys. *Clin Vaccine Immunol* **16**, 1332-1337,  
555 doi:10.1128/CVI.00119-09 (2009).
- 556 47 Ward, M. J. *et al.* Zika Virus and the World Health Organization Criteria for Determining Recent  
557 Infection Using Plaque Reduction Neutralization Testing. *Am J Trop Med Hyg* **99**, 780-782,  
558 doi:10.4269/ajtmh.18-0237 (2018).
- 559 48 R: A language and environment for statistical computing (R Foundation for Statistical  
560 Computing, Vienna, Austria, 2018).

## 561 **Acknowledgements**

562 This work was supported by a pilot award to N.J.M. from the Tulane National Primate Research Center  
563 base grant (NIH P51OD011104). The funders had no role in study design and interpretation.

## 564 **Author contributions**

565 B.S., A.T.P., and N.J.M. planned the studies. B.S., M.F., E.A.S., M.J.W., K.H., D.M.S., R.V.B., M.H.G.,  
566 L.A.D.M., and V.W.D. conducted the experiments. D.M.W. and M.C.B. provided reagents. B.S., M.F.,  
567 M.J.W., R.V.B., A.T.P., and N.J.M. interpreted the studies. B.S. and N.J.M. wrote the first draft. A.T.P.  
568 and N.J.M. obtained funding. All authors reviewed, edited, and approved the paper.

## 569 **Competing interests**

570 The authors declare no competing interests.

## 571 **Materials & Correspondence**

572 Material requests and correspondence should be addressed to N.J.M. ([nmaness@tulane.edu](mailto:nmaness@tulane.edu)).

## 573 **Figure legends**

### 574 **Fig. 1**

575 Delayed serum viremia and altered leukocyte kinetics in CD8-depleted macaques. **(A)** Study design. Two  
576 animals of each cohort were depleted of CD8<sup>+</sup> lymphocytes, and all animals were infected with a  
577 Brazilian isolate of ZIKV. Viremia was tracked over 30 days in cohort 1 and 14 days in cohort 2 before  
578 necropsy. Colors used in the timeline correspond to cohorts and treatment conditions. **(B)** Absolute CD8  
579 T cell counts in blood, as determined by complete blood count (CBC). (*Top*): cohort 1; (*Bottom*): cohort 2  
580 (consistent throughout). **(C)** NK cell frequency, as measured by flow cytometry. **(D)** Viral RNA in serum  
581 over infection. **(E)** Neutrophil-to-lymphocyte ratio (NLR), derived using total neutrophil and lymphocyte  
582 counts in blood from CBC data. **(F)** Fold change in NLR from 0 to 1 dpi among 4 rhesus and 4  
583 cynomolgus macaques included in the present study, in addition to a previous cohort of 4 ZIKV-infected  
584 non-pregnant female rhesus macaques. The significant ( $p \leq 0.05$ ) difference in NLR fold change was  
585 determined using a Mann-Whitney test.

### 586 **Fig. 2**

587 Differential monocyte-driven transcriptional profiles among CD8-depleted and nondepleted macaques.  
588 **(A)** Activation of downstream IFN $\alpha$  effector molecules in whole blood at 3 dpi relative to pre-infection.  
589 cyno. = cynomolgus (consistent throughout). **(B)** Fold regulation of antiviral gene expression in whole  
590 blood at 3 dpi, confirmed using a qRT-PCR array of 84 genes in the rhesus macaque genome. dep. =  
591 CD8-depleted; non. = nondepleted. **(C)** Principal component analysis (PCA) of antiviral gene expression  
592 in whole blood at 3 dpi. **(D)** Activation of downstream IFN $\alpha$  effector molecules in sorted CD14<sup>+</sup>  
593 monocytes and CD14<sup>-</sup> PBMCs at 3 dpi. **(E)** qPCR confirmation of antiviral gene expression in CD14<sup>+</sup>

594 monocytes and CD14- PBMCs at 3 dpi. Gene induction is normalized to b-actin, and fold regulation is  
595 expressed relative to 0 dpi. **(F)** Antiviral gene expression in CD8+ and CD8- fractions of PBMCs from a  
596 nondepleted rhesus macaque at 3 dpi. Gene induction is normalized to b-actin, and fold regulation is  
597 expressed relative to 15 dpi. **(G)** Comparison of antiviral gene induction in cultured, ZIKV-infected  
598 MDMs (red) and the whole blood of nondepleted rhesus macaques at 3 dpi (black). Genes included in the  
599 qPCR array relate to toll-like receptor (TLR), nod-like receptor (NLR) or type-I interferon (IFN-I)  
600 signaling. resp. = responsive.

### 601 **Fig. 3**

602 Altered monocyte activation and frequency in CD8-depleted macaques. **(A-B)** viSNE analyses of  
603 monocyte activation in rhesus (A) and cynomolgus (B) macaques, as measured by CD169 mean  
604 fluorescence intensity (MFI). The viSNE clustering profile of monocyte subsets (*left*) correspond to cell  
605 populations in the CD169 MFI heatmaps in nondepleted and CD8-depleted animals over time (*right*). **(C)**  
606 summaries of CD169 expression in total monocytes. **(D)** Induction of genes related to myeloid cell  
607 activation at 3 dpi relative to pre-infection. **(E-G)** Frequencies of classical (E), nonclassical (F), and  
608 intermediate (G) monocyte subsets in rhesus and cynomolgus macaques over time.

### 609 **Fig. 4**

610 Compensatory adaptive immune responses in CD8-depleted macaques. **(A-B)** viSNE analyses of T cell  
611 activation in rhesus (A) and cynomolgus (B) macaques, as measured by CD69 expression. The viSNE  
612 clustering profiles of CD4 and CD8 T cell subsets (*left*) correspond to cell populations in the CD69  
613 heatmaps in nondepleted and CD8-depleted animals at 1 & 10 dpi (*right*). **(C)** Proliferation of EM CD8 T  
614 cells in rhesus and cynomolgus macaques over time. **(D)** Proliferation of EM CD4 T cells in rhesus and  
615 cynomolgus macaques over time. **(E)** CD8 T cell responses in rhesus macaques, assessed by ICS of  
616 PBMCs stimulated with viral peptides derived from the indicated ZIKV proteins. CD8 T cell responses  
617 were identified by co-positivity for perforin and IFN $\gamma$ . C = capsid; M = membrane; E = envelope; NS1 =

618 nonstructural protein 1 (consistent throughout). (F) Th1 responses, determined by ICS for IL-2 and IFN $\gamma$   
619 co-positivity. (*Inset*): representative antigen-specific cytometry plots for R64357 at 30 dpi. (G) Serum  
620 neutralizing antibody titers in rhesus macaques, represented as PRNT90. (H) Proliferation of B cells in  
621 rhesus and cynomolgus macaques over time. (I) Activation of B cells in rhesus macaques over time.

## 622 **Fig. 5**

623 Enhanced tissue dissemination and neuropathology in CD8-depleted macaques. (A-E) Viral  
624 dissemination in cynomolgus macaques, including lymphatic (A), neural (B) and reproductive (C) tissues,  
625 as well as semen (D) and CSF (E). LN = lymph node; sub. wt. matter = subcortical white matter. (F-H)  
626 Viral dissemination in rhesus macaques, including lymphatic, neural, and reproductive tissues (F), as well  
627 as semen (G) and CSF (H). (I) R25671 brainstem (top) and lumbar spinal cord (bottom). *Top*: There is an  
628 area of encephalomalacia (dotted region, left) adjacent to a vessel that exhibits medial thickening (arrow,  
629 left). The area of malacia is characterized by dilated myelin sheaths with swollen axons (arrow, right) or  
630 gitter cell infiltration (asterisks, right). H&E, Bar = 100  $\mu$ m. *Bottom*: The meninges surrounding the  
631 lumbar spinal cord are multifocally infiltrated by aggregates of lymphocytes (arrows). H&E, Bar = 1 mm  
632 (left) and 100  $\mu$ m (right). (J) R64357 sciatic nerve (top) and brainstem lesions (bottom). *Top*: Small  
633 vessels within the sciatic nerve are surrounded by low numbers of lymphocytes (arrows). *Bottom*: A focal  
634 glial nodule is present within the gray matter of the brainstem (dotted region, left) with dilation of  
635 adjacent myelin sheaths and spheroid formation (arrowhead, right). H&E, Bar = 100  $\mu$ m.

## 636 **Fig. S1**

637 MT807R1 selectively depletes CD8<sup>+</sup> lymphocytes with variable recovery. (A) Flow cytometric analysis  
638 of CD8 T cell frequencies in PBMCs over time. (B-C) Absolute counts of CD4<sup>+</sup>/CD8<sup>+</sup> double-positive T  
639 cells (B) and (C) CD4 T cells prior to infection, determined by CBC.

640 **Fig. S2**

641 Comparison of virus and immune cell dynamics to a previous female cohort. Data from a previous cohort  
642 of ZIKV-infected non-pregnant female rhesus macaques is shown in gray, and data from rhesus macaques  
643 of the present study is overlaid. **(A)** Serum viral loads over the course of the studies. **(B)** CSF viral loads  
644 over the course of the studies. **(C-D)** Frequencies of neutrophils (C) and total lymphocytes (D) in whole  
645 blood over time, determined by CBC. **(E)** NLR, derived using total neutrophil and lymphocyte CBC data.

646 **Fig. S3**

647 Transcriptional responses correlate with serum viremia in nondepleted macaques. **(A)** Induction of genes  
648 related to leukocyte homing in whole blood at 3 dpi relative to pre-infection. **(B)** Activation of biological  
649 functions and disease-related pathways, as assessed by Ingenuity Pathway Analysis (IPA). **(C-D)** Patterns  
650 of antiviral gene induction at 1, 3, and 15 dpi in the whole blood of nondepleted (C) and CD8-depleted  
651 (D) rhesus macaques relative to pre-infection.

652 **Fig. S4**

653 CD8 depletion modulates monocyte phenotype during ZIKV infection. **(A-C)** Flow cytometric analysis of  
654 monocyte activation, as measured by CD169 expression in classical (A), intermediate (B), and  
655 nonclassical (C) subsets in rhesus and cynomolgus macaques. **(D)** Overall monocyte activation, as  
656 measured by CD69 expression. **(E-F)** Expression of CD95 in classical (E) and nonclassical (F) subsets.

657 **Fig. S5**

658 Reciprocal T cell responses are polyphenotypic. **(A-E)** Immunophenotyping of CD8 T cells in rhesus and  
659 cynomolgus macaques, including EM CD8 activation (A), CM CD8 activation (B) and proliferation (C),  
660 and naïve CD8 activation (D) and proliferation (E). **(F-J)** Immunophenotyping of CD4 T cells, including  
661 EM CD4 activation (F), CM CD4 activation (G) and proliferation (H), and naïve CD4 activation (I) and  
662 proliferation (J).

# Fig. 1: Delayed serum viremia and altered leukocyte kinetics

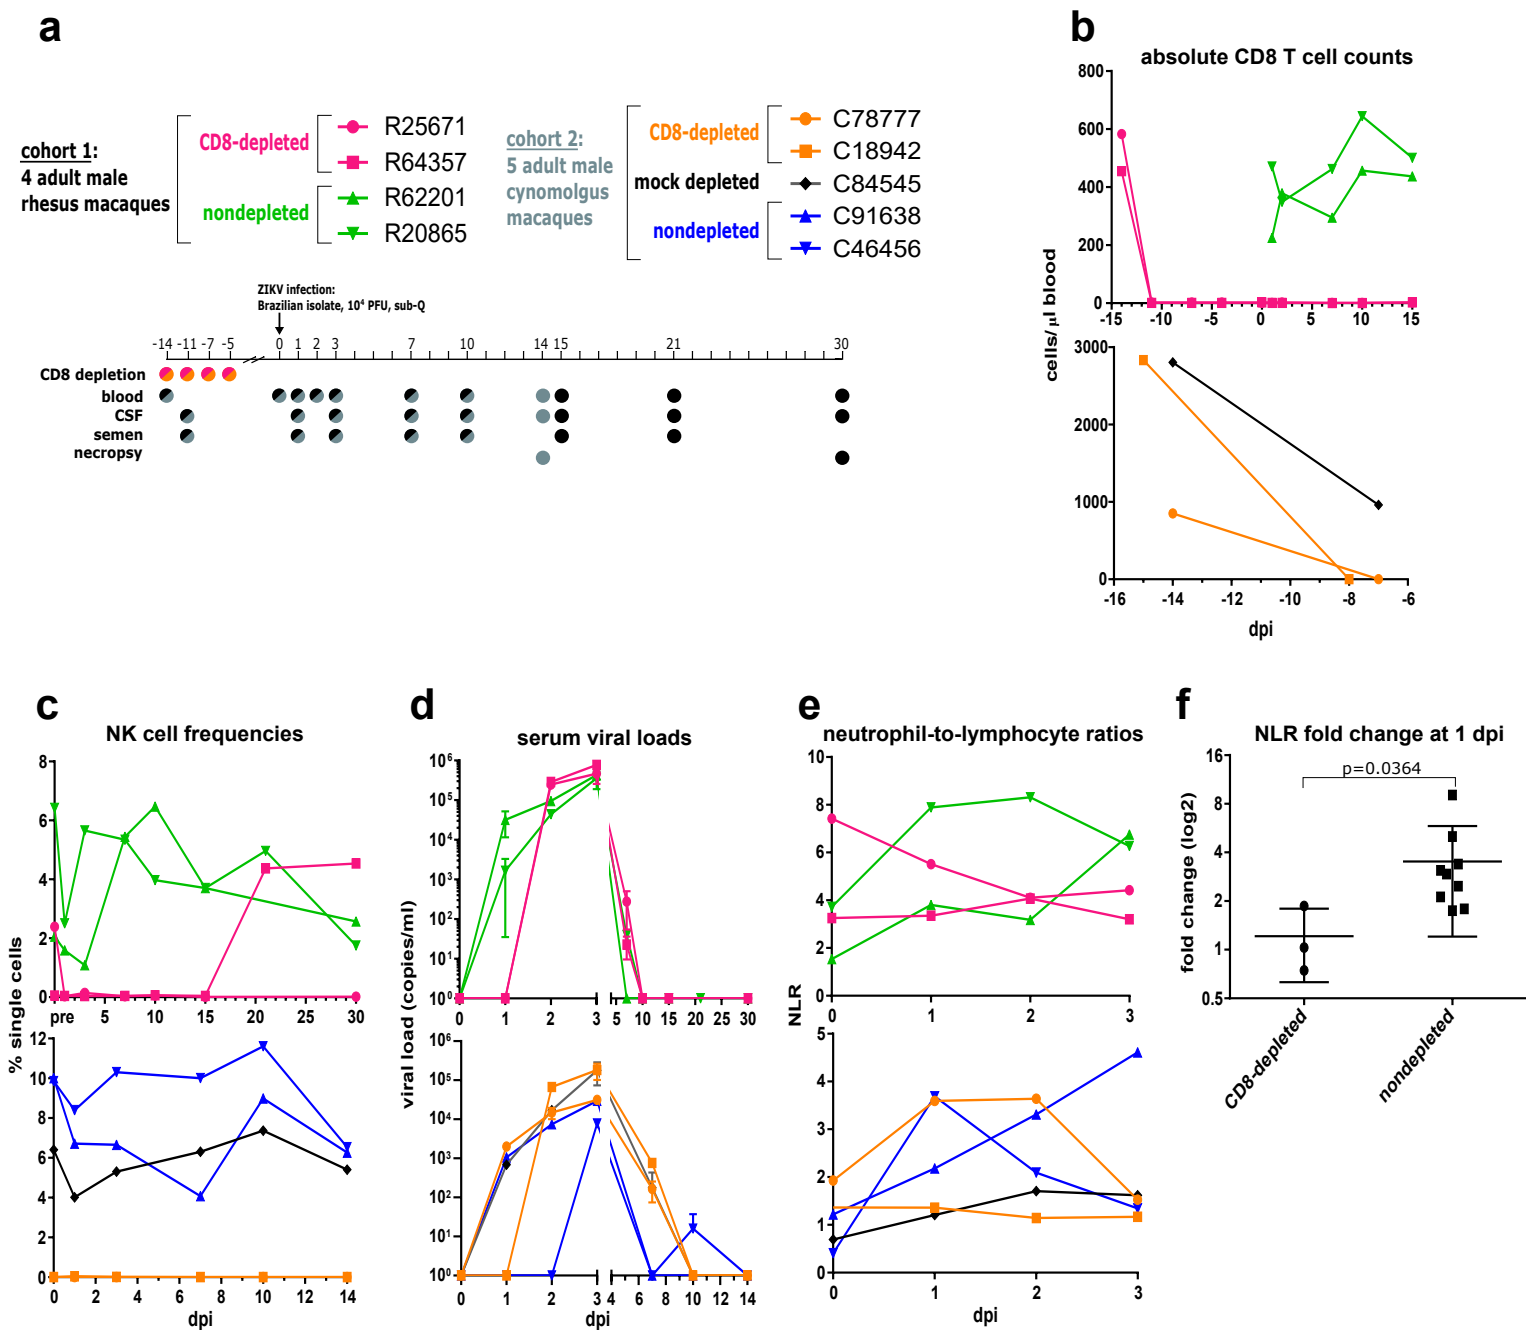

# Fig. 2: Differential monocyte-driven transcriptional profiles

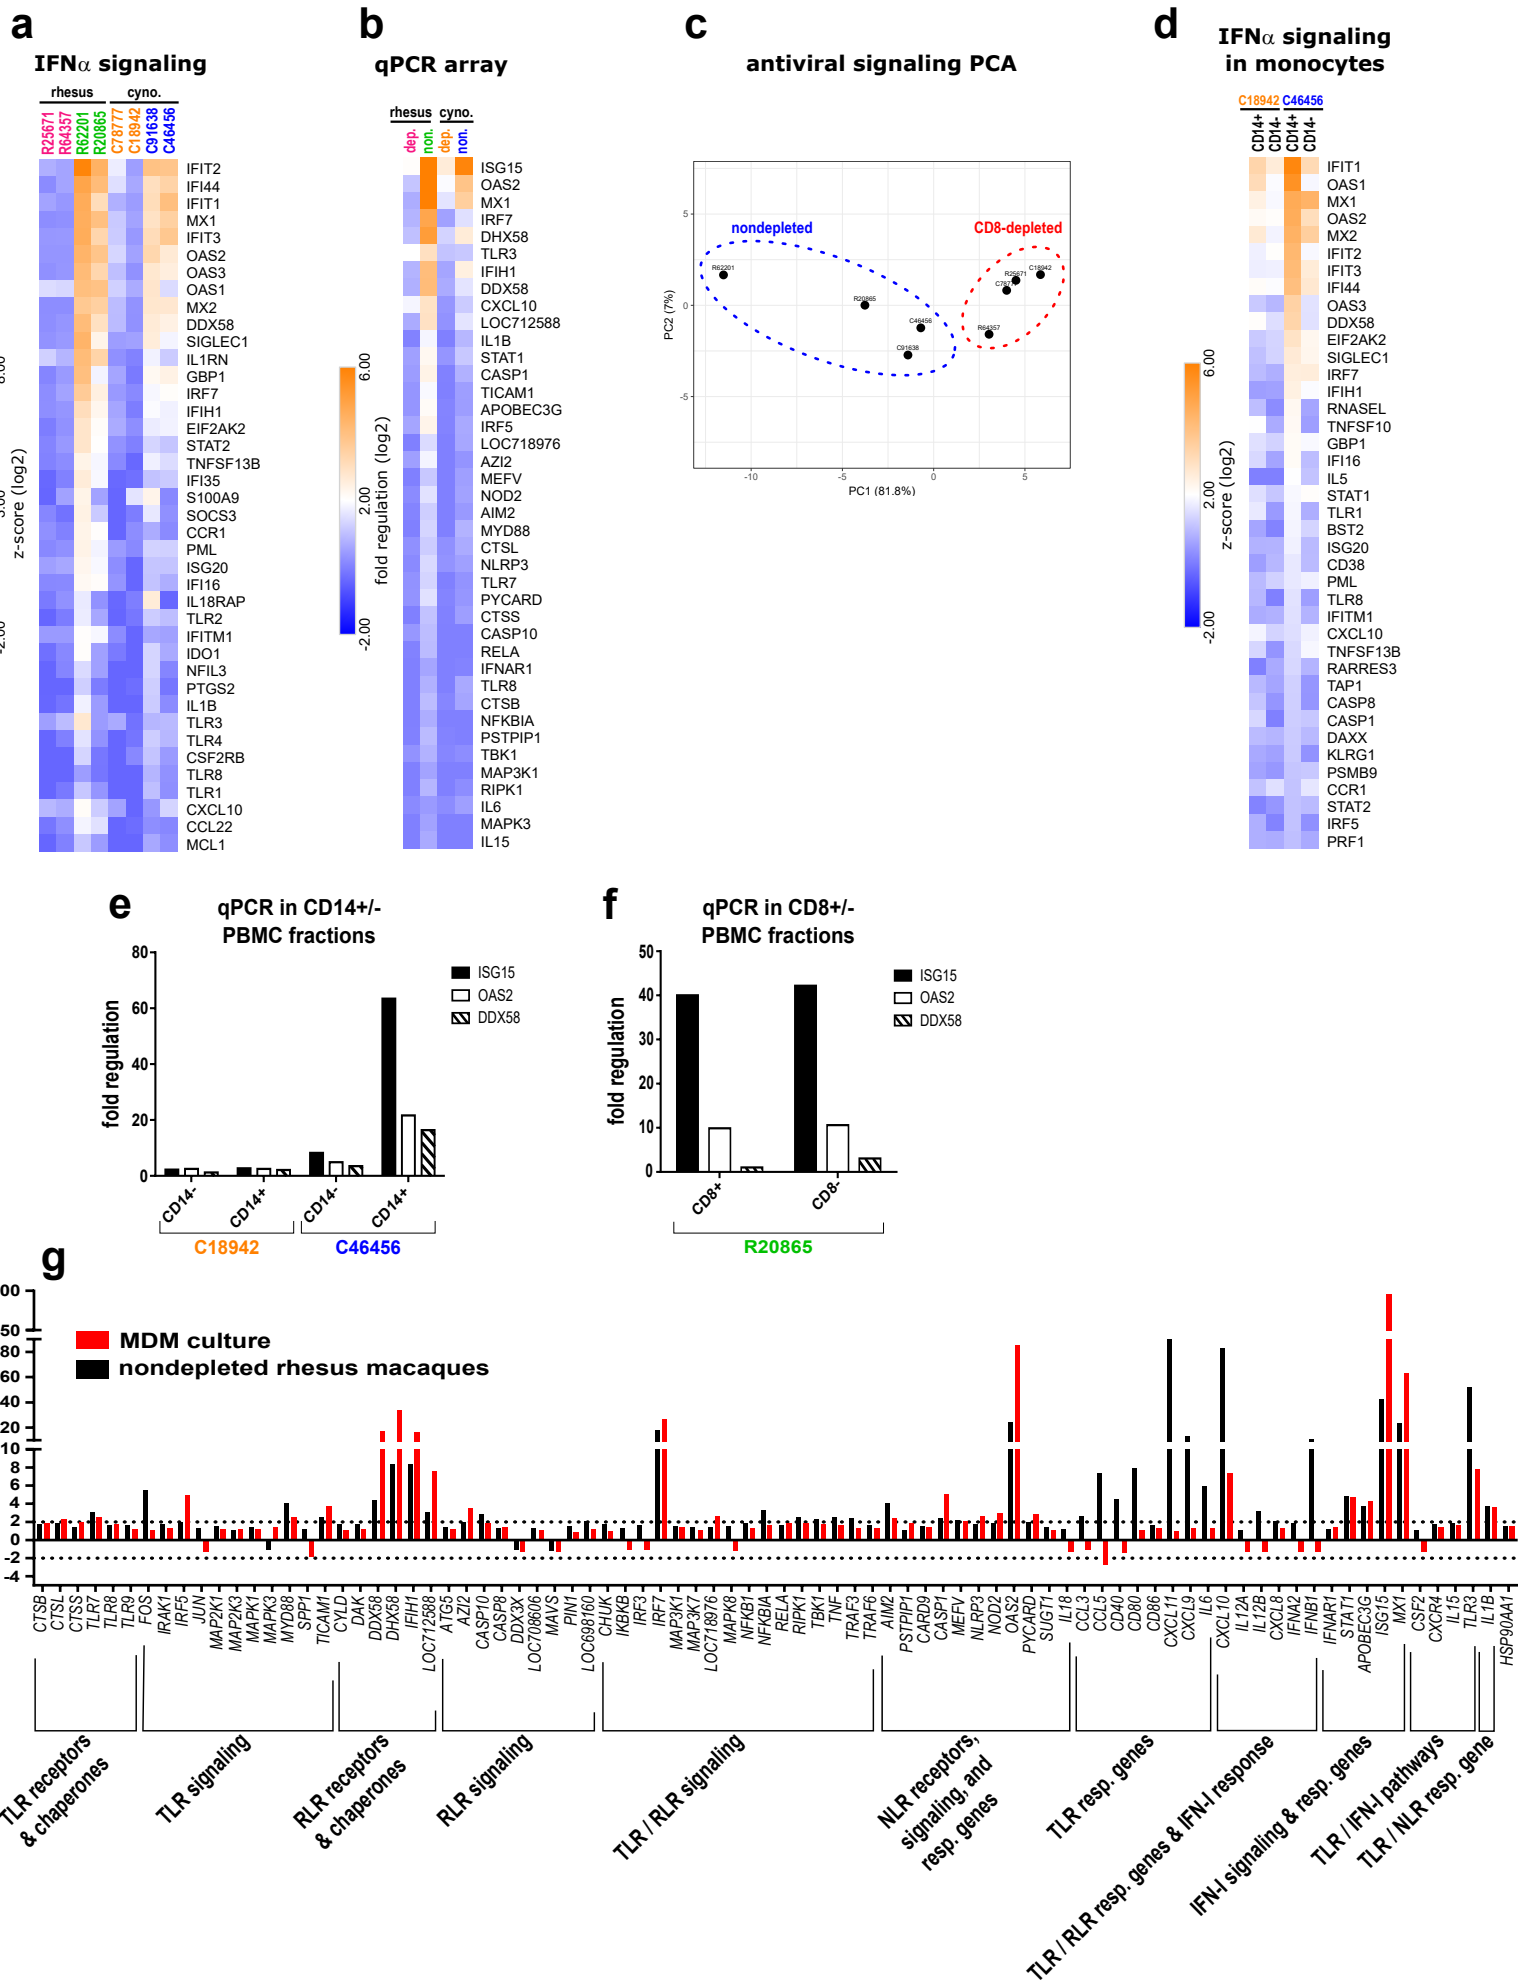

## Fig. 3: Altered monocyte activation and frequency

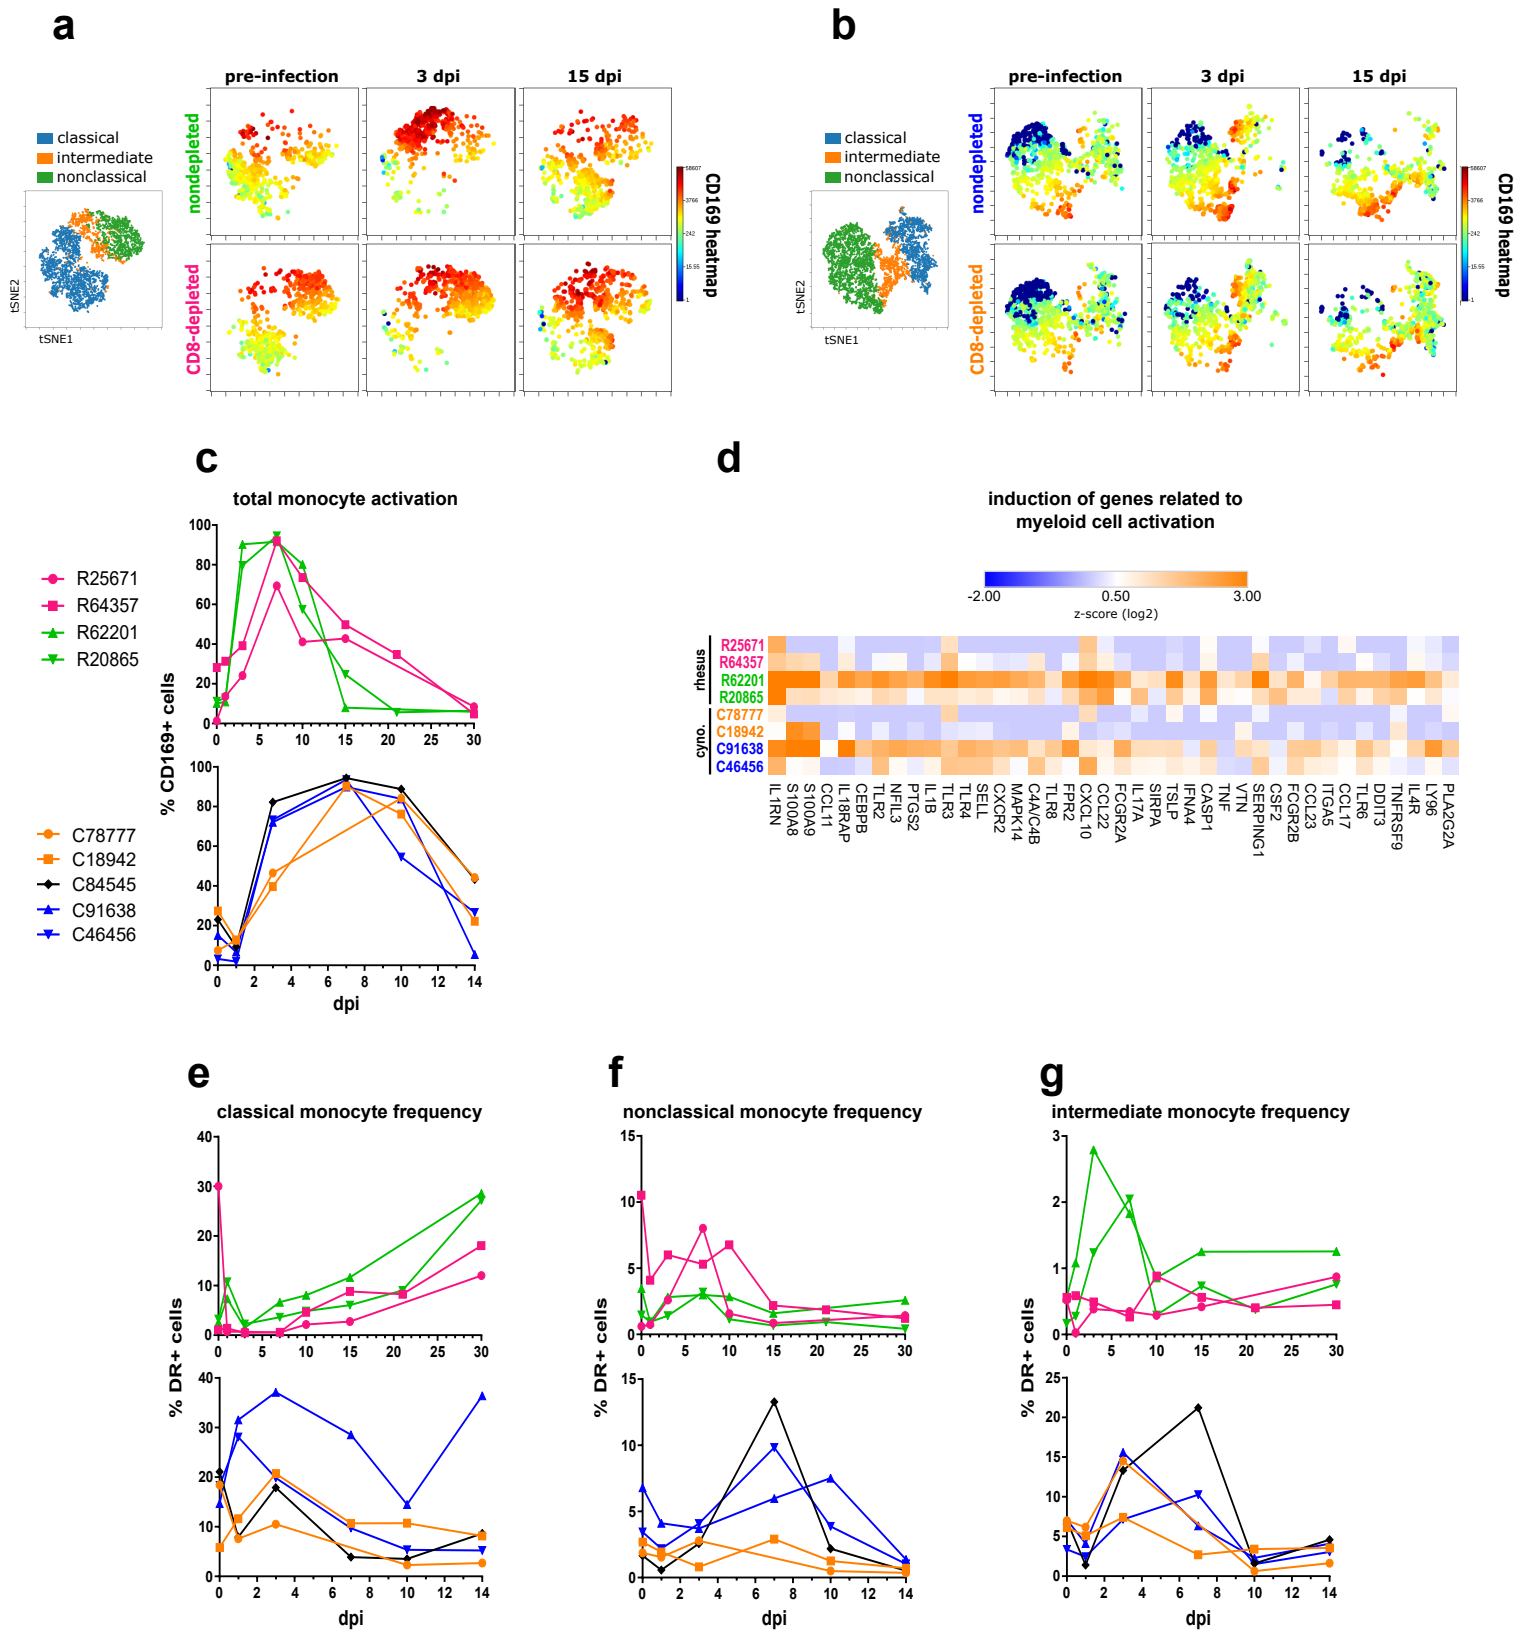



## Fig. 4: Compensatory adaptive immune responses

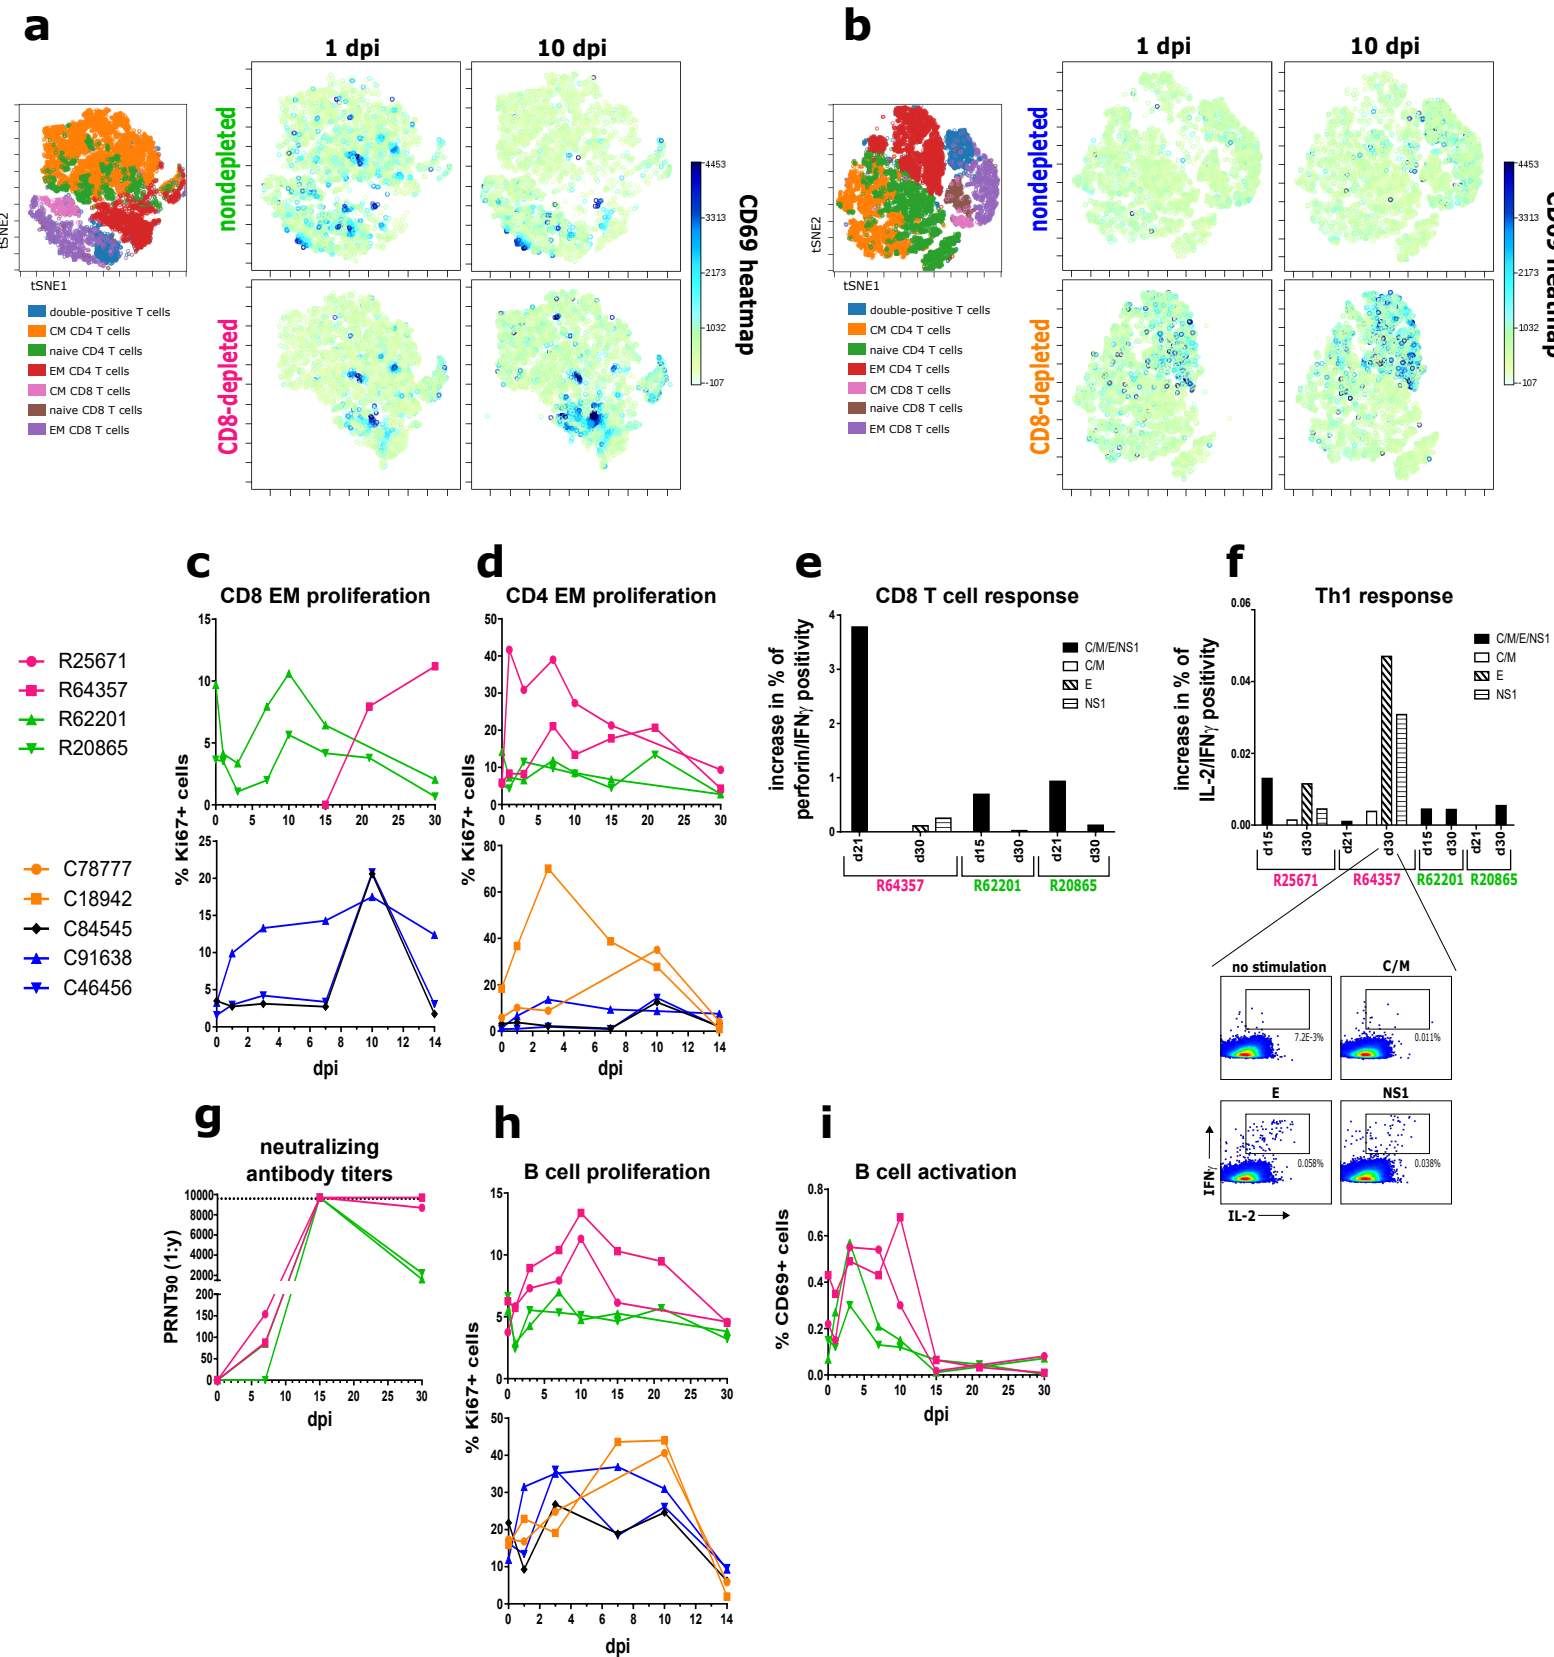

# Fig. 5: Enhanced tissue dissemination and neuropathology

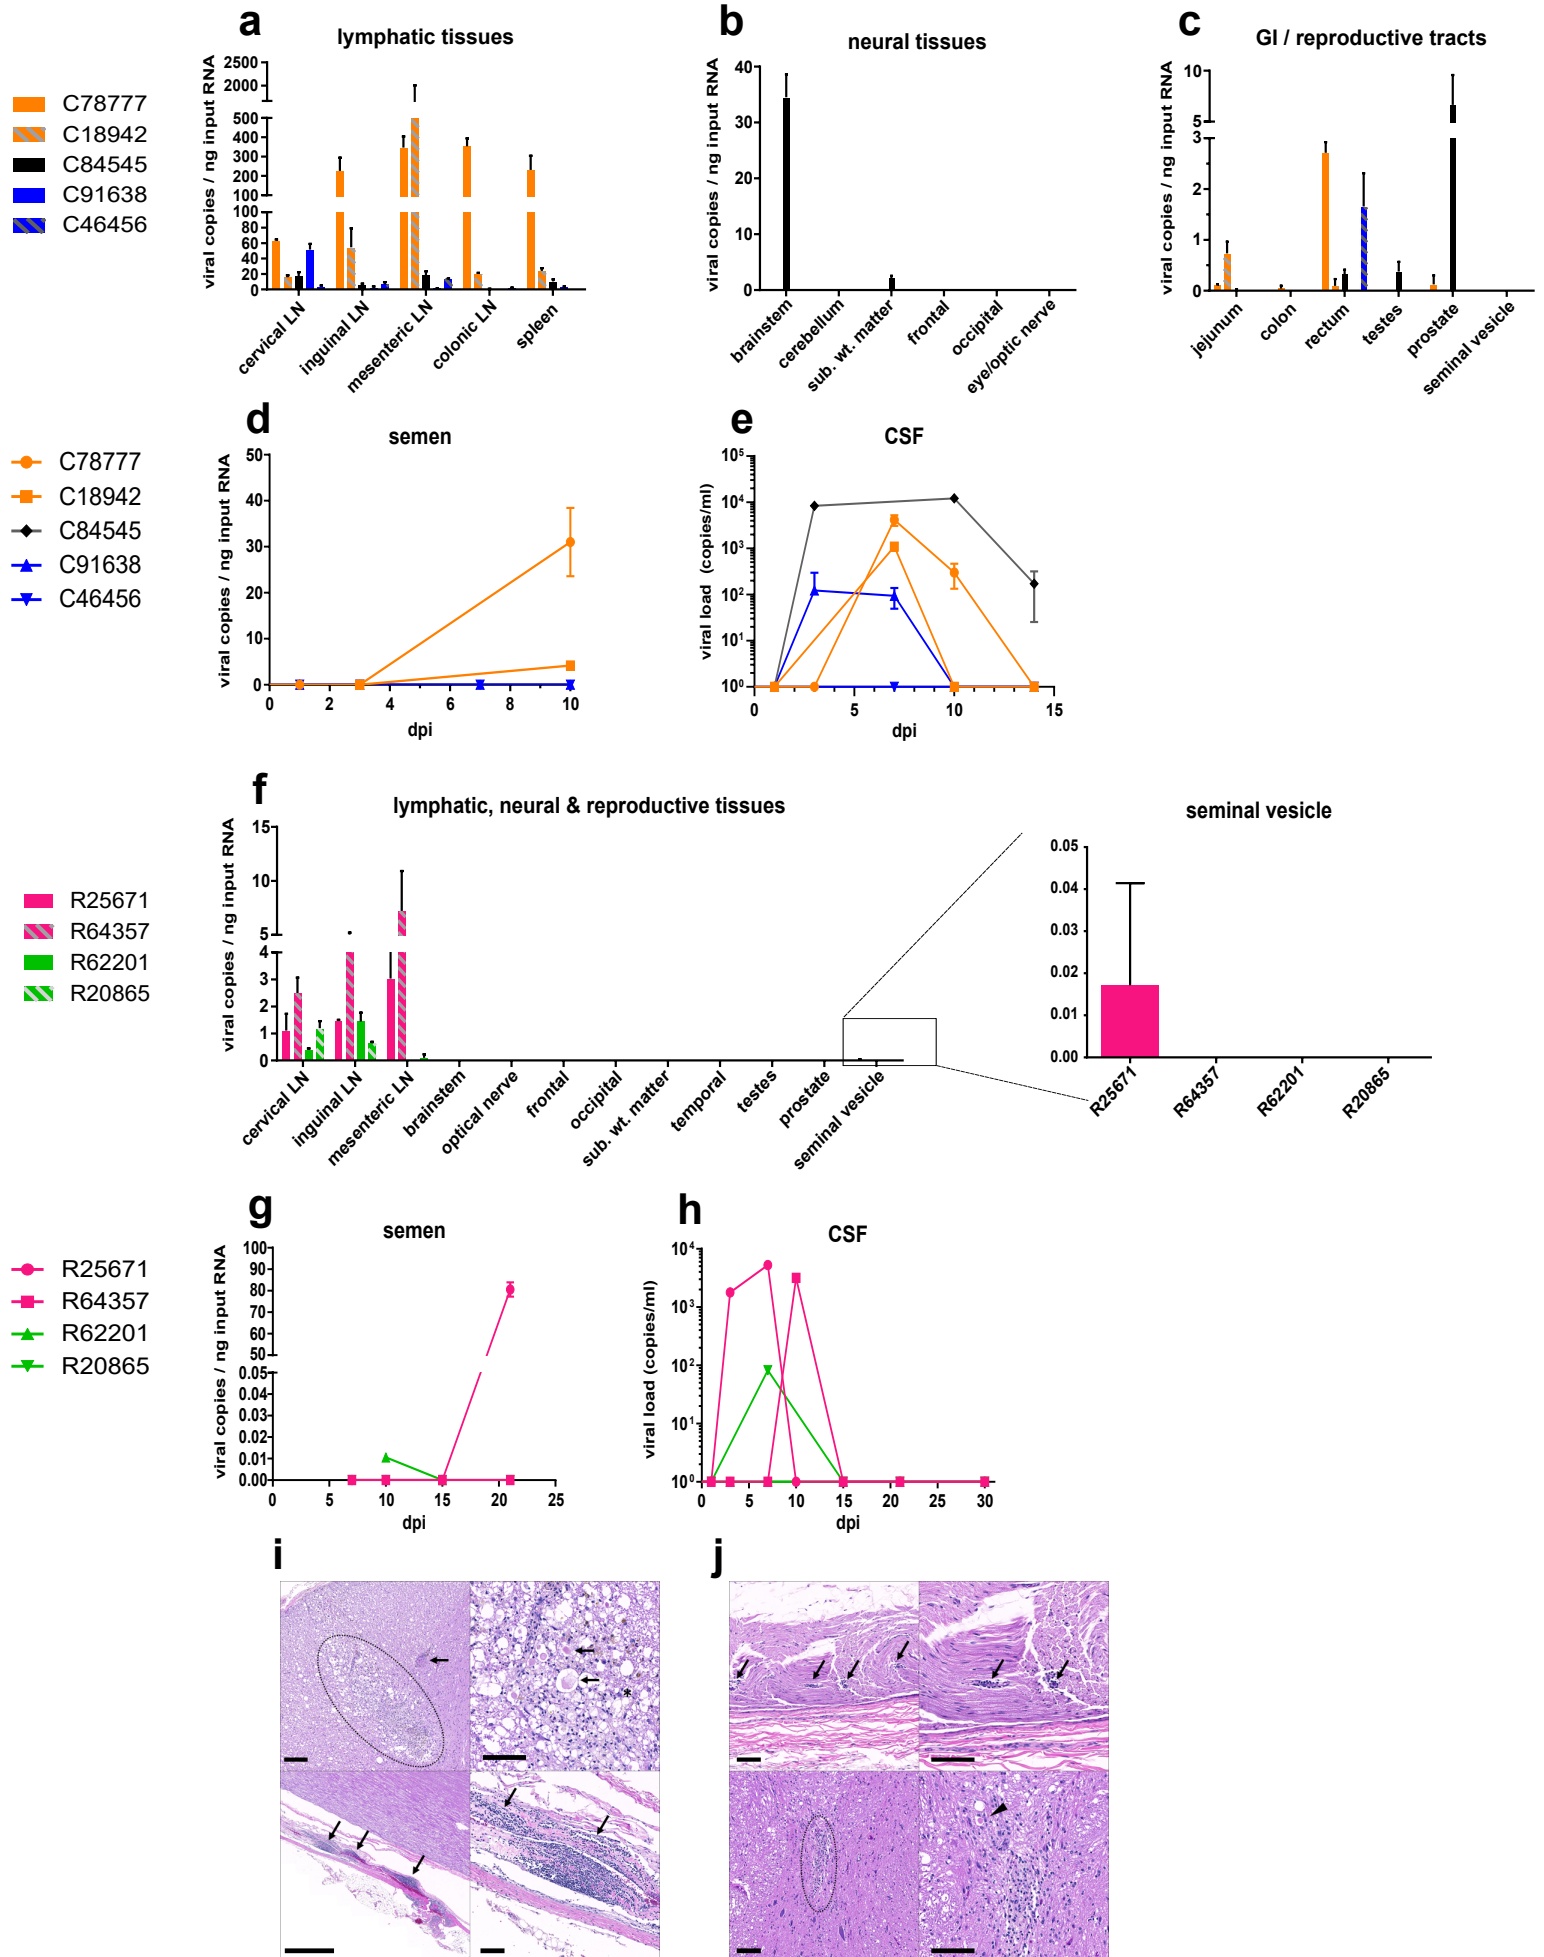

Source: https://www.biorxiv.org/content/10.1101/475418v2.full.pdf
