# Supplementary material for: CD8+ lymphocytes modulate Zika virus dynamics and tissue dissemination and orchestrate antiviral immunity
Source: bioRxiv or medRxiv preprint supplement (doi:10.1101/475418), 2019-07-11

Fig S1: Comparison of viral loads and CBC data to previous female cohort

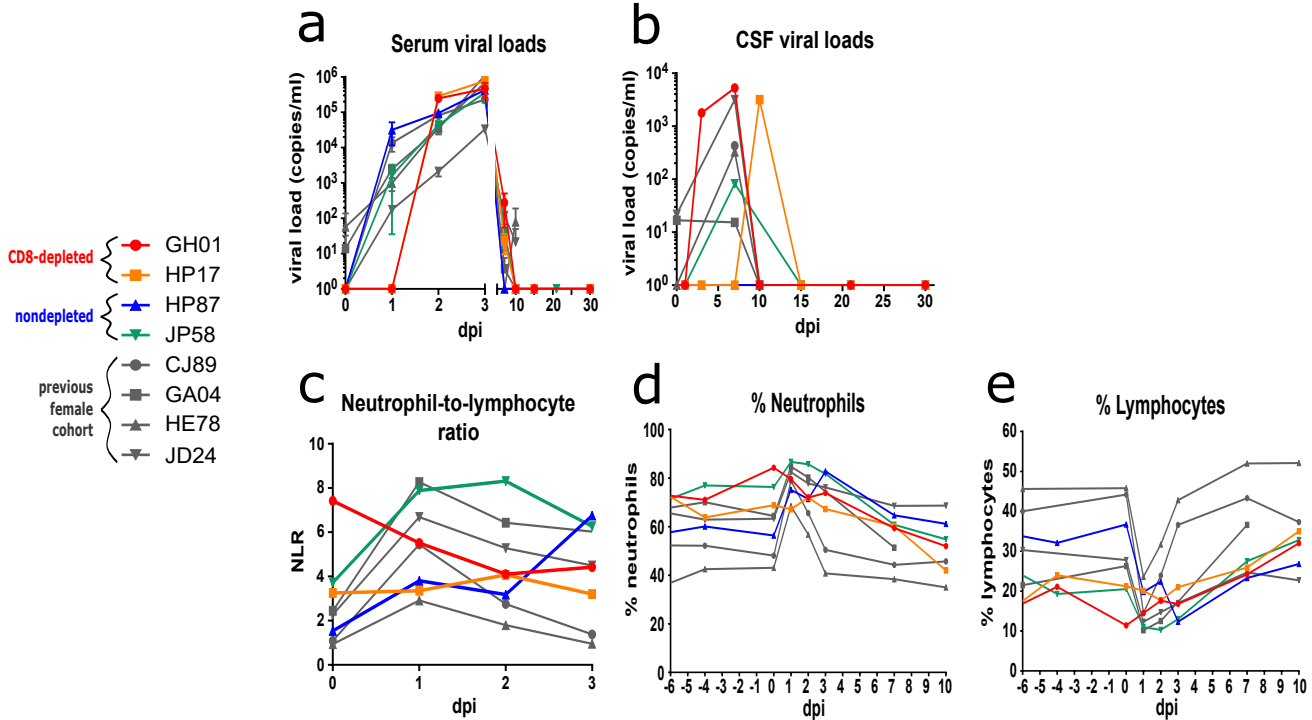

Fig S2: Animal-specific transcriptional responses

1 dpi  
3 dpi  
15 dpi

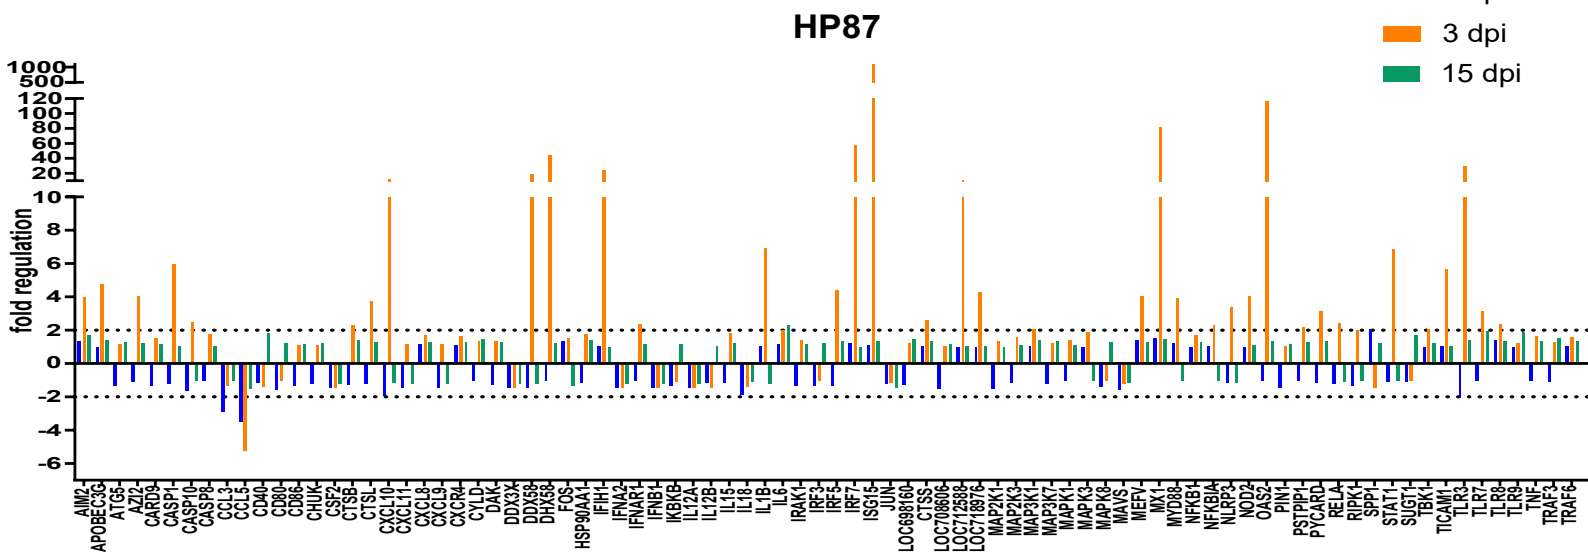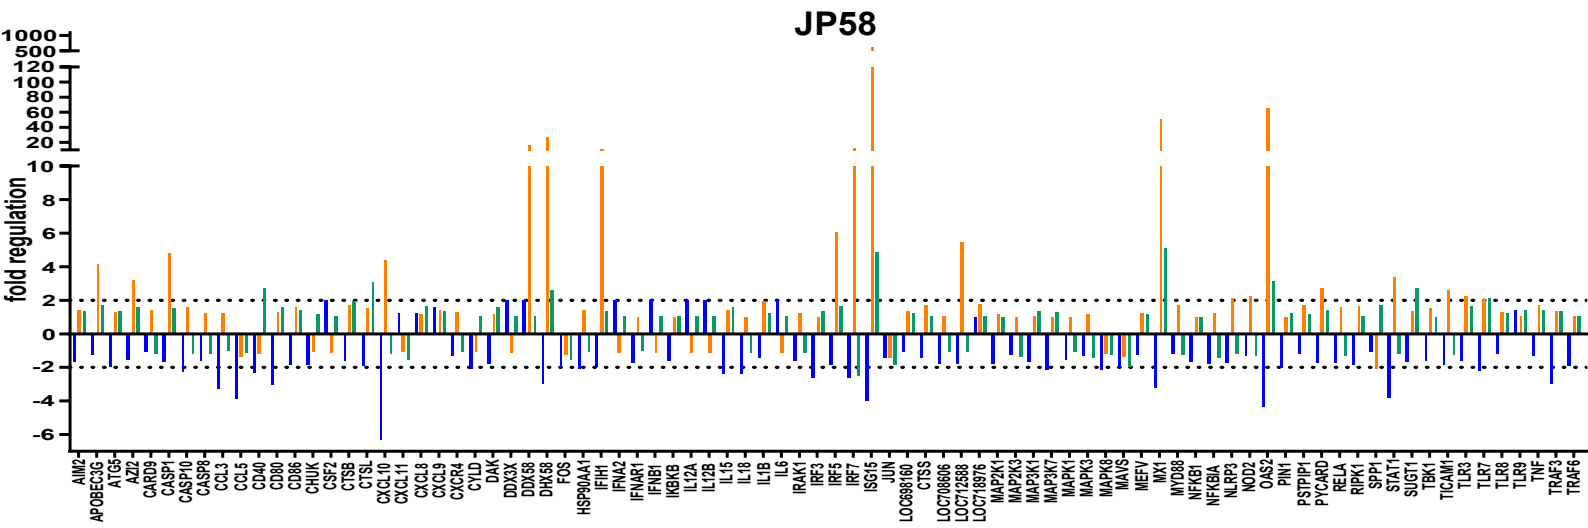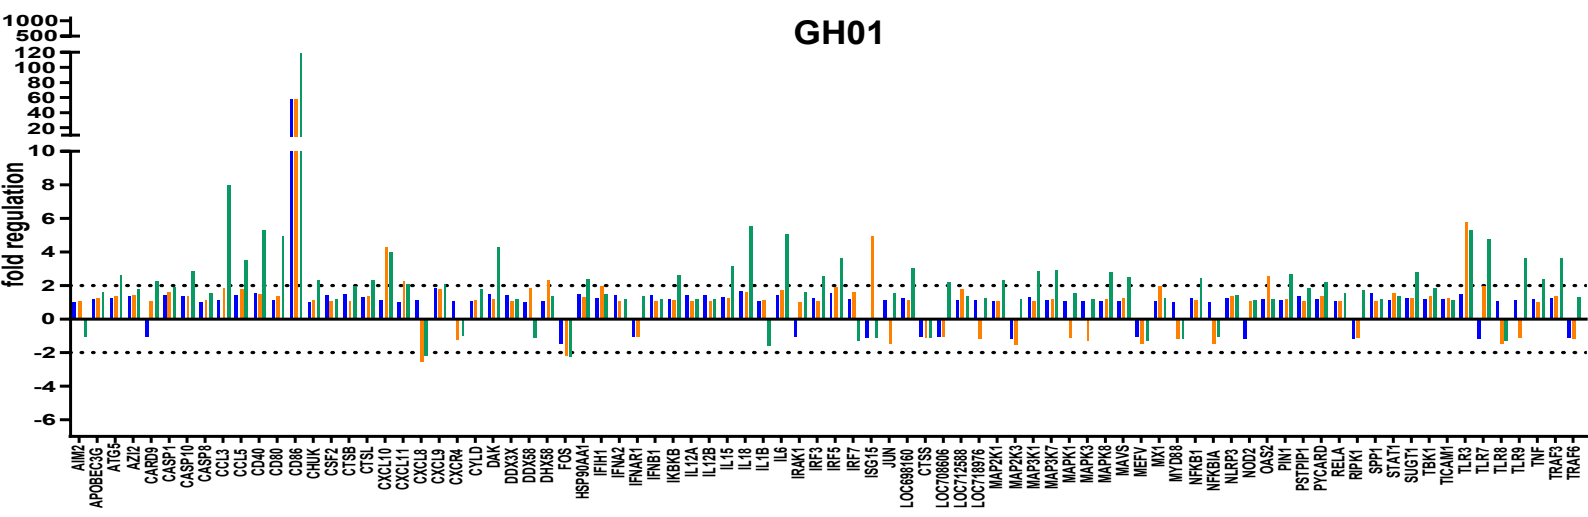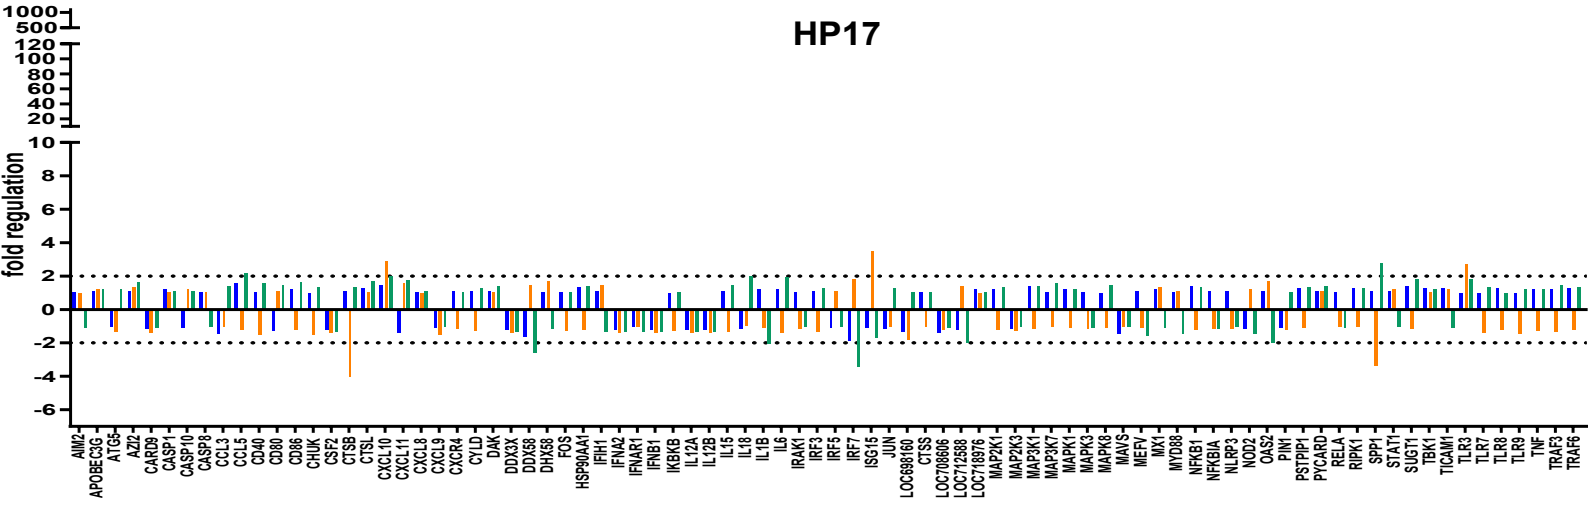

Fig S3: Comparison of antiviral gene expression in CD8+ and CD8- fractions of PBMC

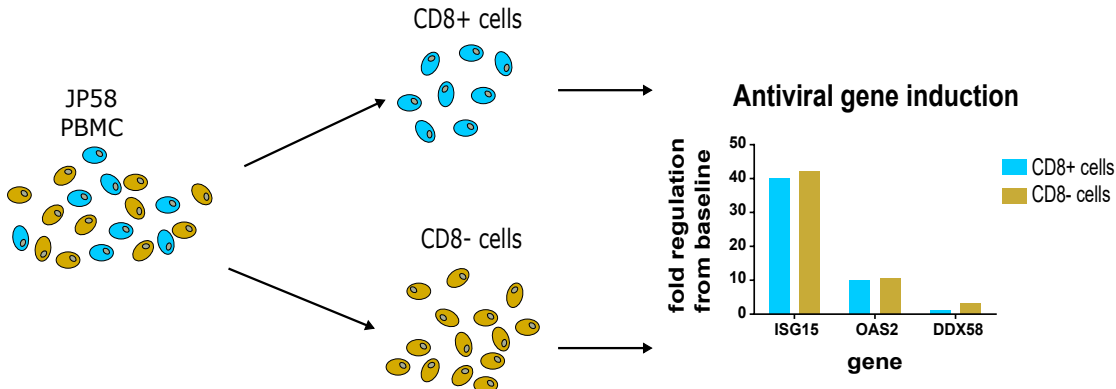

Fig S4: Modulation of monocyte phenotype by CD8 depletion

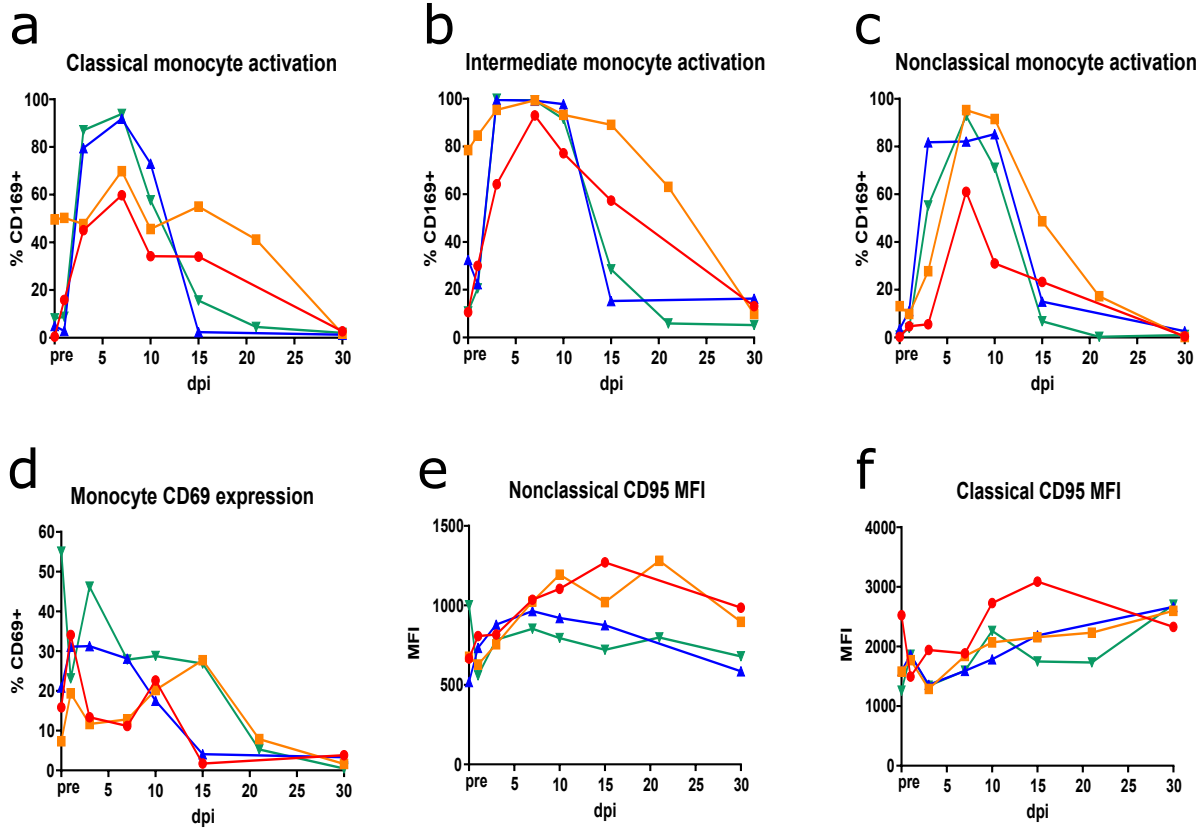

Fig S5: Adaptive immune cell immunophenotyping

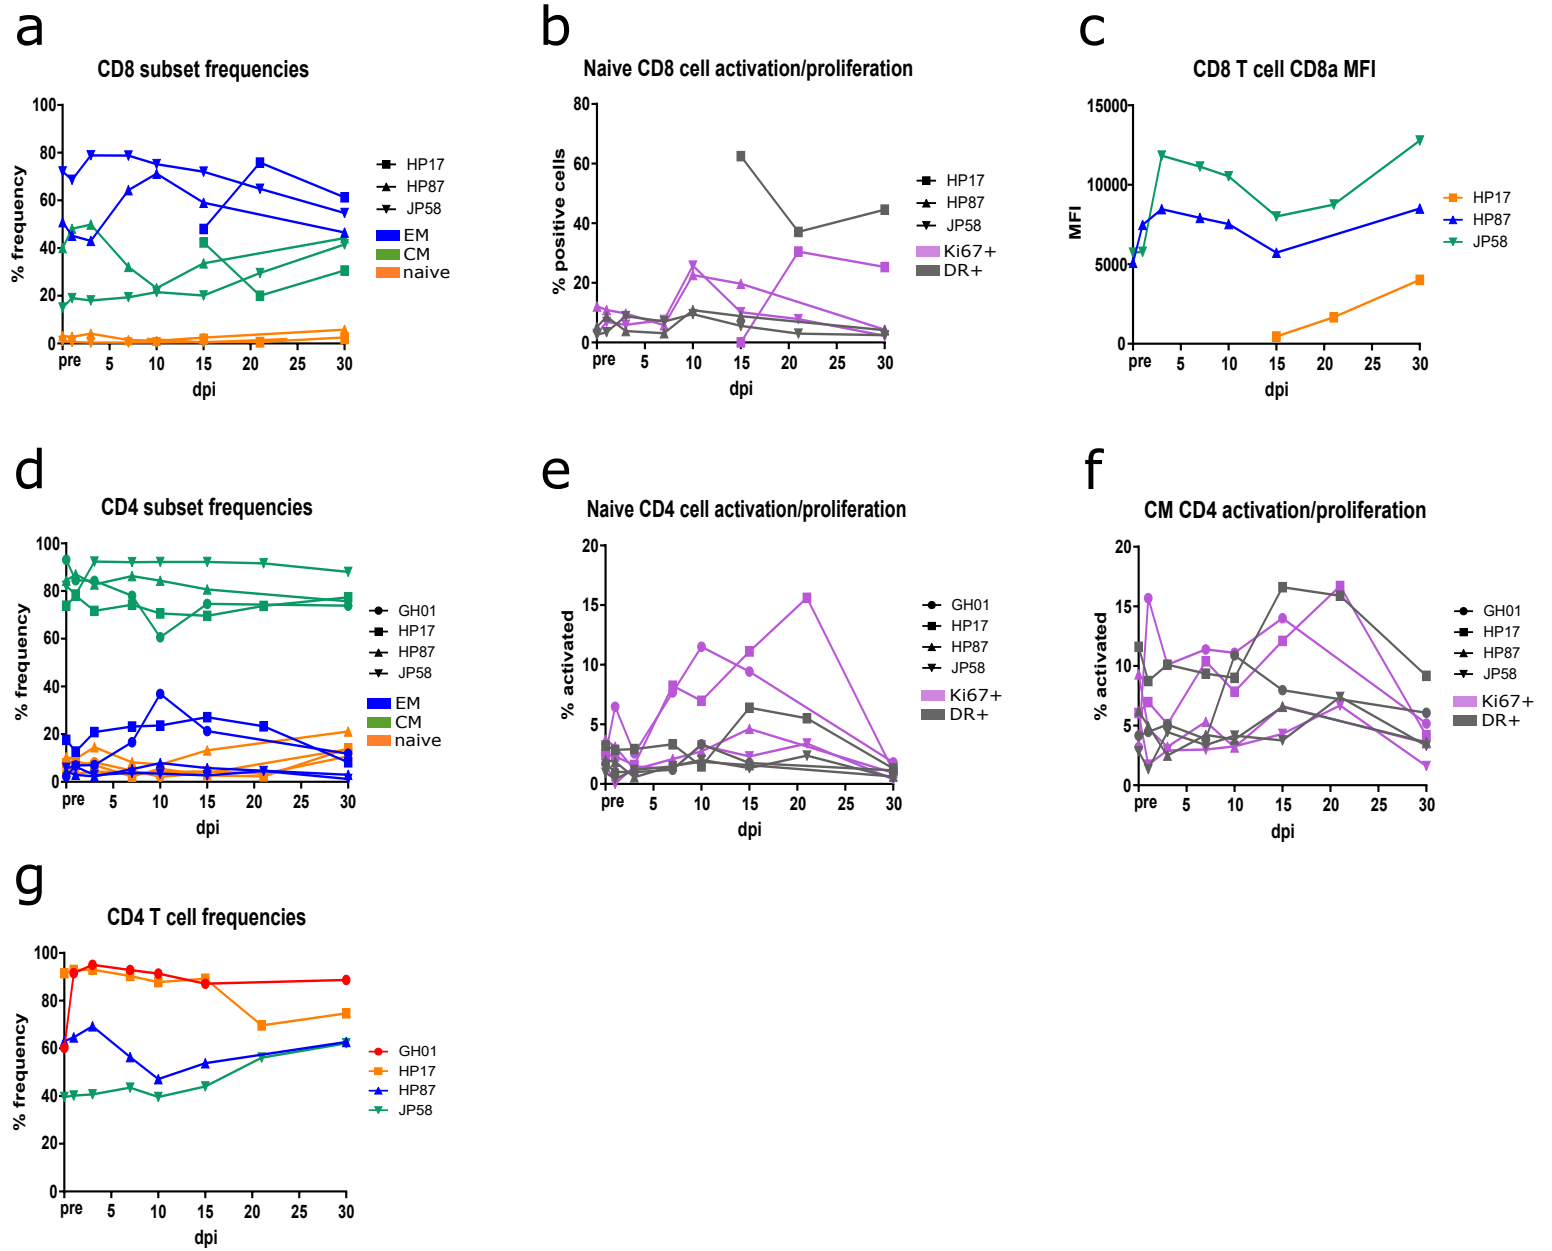

Supplement: Supplementary file [file 475418-1.pdf]
